# Supplementary material
Source: Research Square preprint supplement (doi:10.21203/rs.3.rs-9329453/v1)
Supplement: Supplementary file 1 [file 94d7a2b172377eaee71f9929.xlsx]

## Sheet: Description
Table	Description
Extended Data Table 1	Taxonomic annotation of viral proteins included in the HVIGRID resource.
Extended Data Table 2	Viral-group assignments used for stratified benchmark evaluation.
Extended Data Table 3	Coronavirus–host benchmark pairs with HVIGRID scores and BioGRID evidence annotations.
Extended Data Table 4	Predicted host factors and their shared interaction profiles across three coronaviruses.
Extended Data Table 5	Top-ranked influenza A virus–host interaction candidates predicted by HVIGRID.
Extended Data Table 6	33 shared host factors identified in the H3N2,H9N2,H1N1.
Extended Data Table 7	Viral protein sequences of H3N2,H9N2,H1N1.

## Sheet: Extended Data Table 1
UNIPROT_VIRUS	organism_name	taxid	order	family
P04608	Human immunodeficiency virus type 1 group M subtype B (isolate HXB2) (HIV-1)	11706	Ortervirales	Retroviridae
P05919	Human immunodeficiency virus type 1 group M subtype B (isolate HXB2) (HIV-1)	11706	Ortervirales	Retroviridae
P0DTD1	Severe acute respiratory syndrome coronavirus 2 (2019-nCoV) (SARS-CoV-2)	2697049	Nidovirales	Coronaviridae
P59594	Severe acute respiratory syndrome coronavirus (SARS-CoV)	694009	Nidovirales	Coronaviridae
P08393	Human herpesvirus 1 (strain 17) (HHV-1) (Human herpes simplex virus 1)	10299	Herpesvirales	Orthoherpesviridae
P0C6X7	Severe acute respiratory syndrome coronavirus (SARS-CoV)	694009	Nidovirales	Coronaviridae
P0DTC2	Severe acute respiratory syndrome coronavirus 2 (2019-nCoV) (SARS-CoV-2)	2697049	Nidovirales	Coronaviridae
P03129	Human papillomavirus type 16	333760	Zurhausenvirales	Papillomaviridae
P0DTD2	Severe acute respiratory syndrome coronavirus 2 (2019-nCoV) (SARS-CoV-2)	2697049	Nidovirales	Coronaviridae
K9N5Q8	Middle East respiratory syndrome-related coronavirus (isolate United Kingdom/H123990006/2012) (MERS-CoV) (Betacoronavirus England 1)	1263720	Nidovirales	Coronaviridae
K9N7C7	Middle East respiratory syndrome-related coronavirus (isolate United Kingdom/H123990006/2012) (MERS-CoV) (Betacoronavirus England 1)	1263720	Nidovirales	Coronaviridae
P03126	Human papillomavirus type 16	333760	Zurhausenvirales	Papillomaviridae
P04591	Human immunodeficiency virus type 1 group M subtype B (isolate HXB2) (HIV-1)	11706	Ortervirales	Retroviridae
P0DTC3	Severe acute respiratory syndrome coronavirus 2 (2019-nCoV) (SARS-CoV-2)	2697049	Nidovirales	Coronaviridae
P0DTC6	Severe acute respiratory syndrome coronavirus 2 (2019-nCoV) (SARS-CoV-2)	2697049	Nidovirales	Coronaviridae
P0DTC9	Severe acute respiratory syndrome coronavirus 2 (2019-nCoV) (SARS-CoV-2)	2697049	Nidovirales	Coronaviridae
P69723	Human immunodeficiency virus type 1 group M subtype B (isolate HXB2) (HIV-1)	11706	Ortervirales	Retroviridae
P06464	Human papillomavirus type 6b	10600	Zurhausenvirales	Papillomaviridae
F5HEZ4	Human herpesvirus 8 type P (isolate GK18) (HHV-8) (Kaposi's sarcoma-associated herpesvirus)	868565	Herpesvirales	Orthoherpesviridae
A0A288CFT1	Human immunodeficiency virus type 1 group M subtype B (isolate HXB2) (HIV-1)	11706	Ortervirales	Retroviridae
P04601	Human immunodeficiency virus type 1 group M subtype B (isolate HXB2) (HIV-1)	11706	Ortervirales	Retroviridae
P06427	Human papillomavirus 33	10586	Zurhausenvirales	Papillomaviridae
P59595	Severe acute respiratory syndrome coronavirus (SARS-CoV)	694009	Nidovirales	Coronaviridae
F5HF68	Human herpesvirus 8 type P (isolate GK18) (HHV-8) (Kaposi's sarcoma-associated herpesvirus)	868565	Herpesvirales	Orthoherpesviridae
P04585	Human immunodeficiency virus type 1 group M subtype B (isolate HXB2) (HIV-1)	11706	Ortervirales	Retroviridae
P0DTC7	Severe acute respiratory syndrome coronavirus 2 (2019-nCoV) (SARS-CoV-2)	2697049	Nidovirales	Coronaviridae
P0DTC4	Severe acute respiratory syndrome coronavirus 2 (2019-nCoV) (SARS-CoV-2)	2697049	Nidovirales	Coronaviridae
P0DTC8	Severe acute respiratory syndrome coronavirus 2 (2019-nCoV) (SARS-CoV-2)	2697049	Nidovirales	Coronaviridae
P03070	Simian virus 40 (SV40)	1891767	Sepolyvirales	Polyomaviridae
P03211	Epstein-Barr virus (strain B95-8) (HHV-4) (Human herpesvirus 4)	10377	Herpesvirales	Orthoherpesviridae
P04578	Human immunodeficiency virus type 1 group M subtype B (isolate HXB2) (HIV-1)	11706	Ortervirales	Retroviridae
P0DTC5	Severe acute respiratory syndrome coronavirus 2 (2019-nCoV) (SARS-CoV-2)	2697049	Nidovirales	Coronaviridae
P59634	Severe acute respiratory syndrome coronavirus (SARS-CoV)	694009	Nidovirales	Coronaviridae
P04020	Human papillomavirus 11	10580	Zurhausenvirales	Papillomaviridae
P0DTD8	Severe acute respiratory syndrome coronavirus 2 (2019-nCoV) (SARS-CoV-2)	2697049	Nidovirales	Coronaviridae
F5HCM1	Human cytomegalovirus (strain Merlin) (HHV-5) (Human herpesvirus 5)	295027	Herpesvirales	Orthoherpesviridae
P06428	Human papillomavirus type 8	10579	Zurhausenvirales	Papillomaviridae
P18099	Human immunodeficiency virus type 2 subtype A (isolate BEN) (HIV-2)	11714	Ortervirales	Retroviridae
Q02842	Simian immunodeficiency virus agm.grivet (isolate AGM gr-1) (SIV-agm.gri) (Simian immunodeficiency virus African green monkey grivet)	31684	Ortervirales	Retroviridae
A0A663DJA2	Severe acute respiratory syndrome coronavirus 2 (2019-nCoV) (SARS-CoV-2)	2697049	Nidovirales	Coronaviridae
P03230	Epstein-Barr virus (strain B95-8) (HHV-4) (Human herpesvirus 4)	10377	Herpesvirales	Orthoherpesviridae
P18095	Human immunodeficiency virus type 2 subtype A (isolate BEN) (HIV-2)	11714	Ortervirales	Retroviridae
P18378	Vaccinia virus (strain Western Reserve) (VACV) (Vaccinia virus (strain WR))	10254	Chitovirales	Poxviridae
Q2HR75	Human herpesvirus 8 type P (isolate GK18) (HHV-8) (Kaposi's sarcoma-associated herpesvirus)	868565	Herpesvirales	Orthoherpesviridae
P59596	Severe acute respiratory syndrome coronavirus (SARS-CoV)	694009	Nidovirales	Coronaviridae
P59637	Severe acute respiratory syndrome coronavirus (SARS-CoV)	694009	Nidovirales	Coronaviridae
P04618	Human immunodeficiency virus type 1 group M subtype B (isolate HXB2) (HIV-1)	11706	Ortervirales	Retroviridae
P59636	Severe acute respiratory syndrome coronavirus (SARS-CoV)	694009	Nidovirales	Coronaviridae
P17386	Human papillomavirus 31	10585	Zurhausenvirales	Papillomaviridae
Q9QR71	Human herpesvirus 8 type P (isolate GK18) (HHV-8) (Kaposi's sarcoma-associated herpesvirus)	868565	Herpesvirales	Orthoherpesviridae
P06462	Human papillomavirus type 6b	10600	Zurhausenvirales	Papillomaviridae
P04019	Human papillomavirus 11	10580	Zurhausenvirales	Papillomaviridae
F5HBC6	Human cytomegalovirus (strain Merlin) (HHV-5) (Human herpesvirus 5)	295027	Herpesvirales	Orthoherpesviridae
Q6SVX2	Human cytomegalovirus (strain Merlin) (HHV-5) (Human herpesvirus 5)	295027	Herpesvirales	Orthoherpesviridae
P26555	Human papillomavirus 58	10598	Zurhausenvirales	Papillomaviridae
P36802	Human papillomavirus type 10	333759	Zurhausenvirales	Papillomaviridae
P36814	Human papillomavirus 52	10618	Zurhausenvirales	Papillomaviridae
P06429	Human papillomavirus 33	10586	Zurhausenvirales	Papillomaviridae
P06430	Human papillomavirus type 8	10579	Zurhausenvirales	Papillomaviridae
P0DKB0	Human papillomavirus 31	10585	Zurhausenvirales	Papillomaviridae
F5HCV3	Human herpesvirus 8 type P (isolate GK18) (HHV-8) (Kaposi's sarcoma-associated herpesvirus)	868565	Herpesvirales	Orthoherpesviridae
P08392	Human herpesvirus 1 (strain 17) (HHV-1) (Human herpes simplex virus 1)	10299	Herpesvirales	Orthoherpesviridae
P06922	Human papillomavirus type 16	333760	Zurhausenvirales	Papillomaviridae
K9N4V7	Middle East respiratory syndrome-related coronavirus (isolate United Kingdom/H123990006/2012) (MERS-CoV) (Betacoronavirus England 1)	1263720	Nidovirales	Coronaviridae
P06492	Human herpesvirus 1 (strain 17) (HHV-1) (Human herpes simplex virus 1)	10299	Herpesvirales	Orthoherpesviridae
P12978	Epstein-Barr virus (strain B95-8) (HHV-4) (Human herpesvirus 4)	10377	Herpesvirales	Orthoherpesviridae
Q02843	Simian immunodeficiency virus agm.grivet (isolate AGM gr-1) (SIV-agm.gri) (Simian immunodeficiency virus African green monkey grivet)	31684	Ortervirales	Retroviridae
P03186	Epstein-Barr virus (strain B95-8) (HHV-4) (Human herpesvirus 4)	10377	Herpesvirales	Orthoherpesviridae
P17387	Human papillomavirus 31	10585	Zurhausenvirales	Papillomaviridae
P36313	Human herpesvirus 1 (strain 17) (HHV-1) (Human herpes simplex virus 1)	10299	Herpesvirales	Orthoherpesviridae
P06930	Human papillomavirus 5	333923	Zurhausenvirales	Papillomaviridae
Q6SW29	Human cytomegalovirus (strain Merlin) (HHV-5) (Human herpesvirus 5)	295027	Herpesvirales	Orthoherpesviridae
P36827	Human papillomavirus type 32	333763	Zurhausenvirales	Papillomaviridae
Q02840	Simian immunodeficiency virus agm.grivet (isolate AGM gr-1) (SIV-agm.gri) (Simian immunodeficiency virus African green monkey grivet)	31684	Ortervirales	Retroviridae
P36800	Human papillomavirus 7	10620	Zurhausenvirales	Papillomaviridae
P0C731	Epstein-Barr virus (strain GD1) (HHV-4) (Human gammaherpesvirus 4)	10376	Herpesvirales	Orthoherpesviridae
Q02841	Simian immunodeficiency virus agm.grivet (isolate AGM gr-1) (SIV-agm.gri) (Simian immunodeficiency virus African green monkey grivet)	31684	Ortervirales	Retroviridae
F5HHZ3	Human cytomegalovirus (strain Merlin) (HHV-5) (Human herpesvirus 5)	295027	Herpesvirales	Orthoherpesviridae
F5HIC6	Human herpesvirus 8 type P (isolate GK18) (HHV-8) (Kaposi's sarcoma-associated herpesvirus)	868565	Herpesvirales	Orthoherpesviridae
Q69554	Human herpesvirus 6A (strain Uganda-1102) (HHV-6 variant A) (Human B lymphotropic virus)	10370	Herpesvirales	Orthoherpesviridae
P59632	Severe acute respiratory syndrome coronavirus (SARS-CoV)	694009	Nidovirales	Coronaviridae
P59635	Severe acute respiratory syndrome coronavirus (SARS-CoV)	694009	Nidovirales	Coronaviridae
P90489	Human herpesvirus 8 type P (isolate GK18) (HHV-8) (Kaposi's sarcoma-associated herpesvirus)	868565	Herpesvirales	Orthoherpesviridae
P59633	Severe acute respiratory syndrome coronavirus (SARS-CoV)	694009	Nidovirales	Coronaviridae
Q07857	Human papillomavirus 4	10617	Zurhausenvirales	Papillomaviridae
Q6SW66	Human cytomegalovirus (strain Merlin) (HHV-5) (Human herpesvirus 5)	295027	Herpesvirales	Orthoherpesviridae
Q2HR98	Human herpesvirus 8 type P (isolate GK18) (HHV-8) (Kaposi's sarcoma-associated herpesvirus)	868565	Herpesvirales	Orthoherpesviridae
Q6SVZ5	Human cytomegalovirus (strain Merlin) (HHV-5) (Human herpesvirus 5)	295027	Herpesvirales	Orthoherpesviridae
Q6SWA4	Human cytomegalovirus (strain Merlin) (HHV-5) (Human herpesvirus 5)	295027	Herpesvirales	Orthoherpesviridae
Q81018	Human papillomavirus type 54	1671798	Zurhausenvirales	Papillomaviridae
Q07854	Human papillomavirus 4	10617	Zurhausenvirales	Papillomaviridae
Q2HR73	Human herpesvirus 8 type P (isolate GK18) (HHV-8) (Kaposi's sarcoma-associated herpesvirus)	868565	Herpesvirales	Orthoherpesviridae
Q6SW55	Human cytomegalovirus (strain Merlin) (HHV-5) (Human herpesvirus 5)	295027	Herpesvirales	Orthoherpesviridae
Q77Q36	Human herpesvirus 8 type P (isolate GK18) (HHV-8) (Kaposi's sarcoma-associated herpesvirus)	868565	Herpesvirales	Orthoherpesviridae
Q8AZJ5	Epstein-Barr virus (strain B95-8) (HHV-4) (Human herpesvirus 4)	10377	Herpesvirales	Orthoherpesviridae
Q6SVX3	Human cytomegalovirus (strain Merlin) (HHV-5) (Human herpesvirus 5)	295027	Herpesvirales	Orthoherpesviridae
Q77PU6	Human herpesvirus 6B (strain Z29) (HHV-6 variant B) (Human B lymphotropic virus)	36351	Herpesvirales	Orthoherpesviridae
Q9QJ12	Human herpesvirus 6B (strain Z29) (HHV-6 variant B) (Human B lymphotropic virus)	36351	Herpesvirales	Orthoherpesviridae
Q6QCM6	Human herpesvirus 3 (HHV-3) (Varicella-zoster virus)	10335	Herpesvirales	Orthoherpesviridae
Q2PJ65	Human herpesvirus 3 (HHV-3) (Varicella-zoster virus)	10335	Herpesvirales	Orthoherpesviridae
P04296	Human herpesvirus 1 (strain 17) (HHV-1) (Human herpes simplex virus 1)	10299	Herpesvirales	Orthoherpesviridae
P03107	Human papillomavirus type 16	333760	Zurhausenvirales	Papillomaviridae
P03120	Human papillomavirus type 16	333760	Zurhausenvirales	Papillomaviridae
P04293	Human herpesvirus 1 (strain 17) (HHV-1) (Human herpes simplex virus 1)	10299	Herpesvirales	Orthoherpesviridae
P04294	Human herpesvirus 1 (strain 17) (HHV-1) (Human herpes simplex virus 1)	10299	Herpesvirales	Orthoherpesviridae
Q2HR71	Human herpesvirus 8 type P (isolate GK18) (HHV-8) (Kaposi's sarcoma-associated herpesvirus)	868565	Herpesvirales	Orthoherpesviridae
Q2HR82	Human herpesvirus 8 type P (isolate GK18) (HHV-8) (Kaposi's sarcoma-associated herpesvirus)	868565	Herpesvirales	Orthoherpesviridae
Q69559	Human herpesvirus 6A (strain Uganda-1102) (HHV-6 variant A) (Human B lymphotropic virus)	10370	Herpesvirales	Orthoherpesviridae
Q2HR64	Human herpesvirus 8 type P (isolate GK18) (HHV-8) (Kaposi's sarcoma-associated herpesvirus)	868565	Herpesvirales	Orthoherpesviridae
P32888	Human herpesvirus 1 (strain 17) (HHV-1) (Human herpes simplex virus 1)	10299	Herpesvirales	Orthoherpesviridae
Q6SW84	Human cytomegalovirus (strain Merlin) (HHV-5) (Human herpesvirus 5)	295027	Herpesvirales	Orthoherpesviridae
P04015	Human papillomavirus 11	10580	Zurhausenvirales	Papillomaviridae
P0DTD3	Severe acute respiratory syndrome coronavirus 2 (2019-nCoV) (SARS-CoV-2)	2697049	Nidovirales	Coronaviridae
Q80H93	Severe acute respiratory syndrome coronavirus (SARS-CoV)	694009	Nidovirales	Coronaviridae
Q7M6R1	Human cytomegalovirus (strain AD169) (HHV-5) (Human herpesvirus 5)	10360	Herpesvirales	Orthoherpesviridae
P0C732	Epstein-Barr virus (strain GD1) (HHV-4) (Human gammaherpesvirus 4)	10376	Herpesvirales	Orthoherpesviridae
P0DKA0	Human papillomavirus type 16	333760	Zurhausenvirales	Papillomaviridae
Q69549	Human herpesvirus 6A (strain Uganda-1102) (HHV-6 variant A) (Human B lymphotropic virus)	10370	Herpesvirales	Orthoherpesviridae
Q6SW87	Human cytomegalovirus (strain Merlin) (HHV-5) (Human herpesvirus 5)	295027	Herpesvirales	Orthoherpesviridae
Q69505	Human herpesvirus 7 (strain JI) (HHV-7) (Human T lymphotropic virus)	57278	Herpesvirales	Orthoherpesviridae
P04413	Human herpesvirus 1 (strain 17) (HHV-1) (Human herpes simplex virus 1)	10299	Herpesvirales	Orthoherpesviridae
P04485	Human herpesvirus 1 (strain 17) (HHV-1) (Human herpes simplex virus 1)	10299	Herpesvirales	Orthoherpesviridae
P0DTC1	Severe acute respiratory syndrome coronavirus 2 (2019-nCoV) (SARS-CoV-2)	2697049	Nidovirales	Coronaviridae
P04014	Human papillomavirus 11	10580	Zurhausenvirales	Papillomaviridae
P04487	Human herpesvirus 1 (strain 17) (HHV-1) (Human herpes simplex virus 1)	10299	Herpesvirales	Orthoherpesviridae
P03206	Epstein-Barr virus (strain B95-8) (HHV-4) (Human herpesvirus 4)	10377	Herpesvirales	Orthoherpesviridae
P16913	Vaccinia virus (strain Western Reserve) (VACV) (Vaccinia virus (strain WR))	10254	Chitovirales	Poxviridae
P03101	Human papillomavirus type 16	333760	Zurhausenvirales	Papillomaviridae
P03114	Human papillomavirus type 16	333760	Zurhausenvirales	Papillomaviridae
P03185	Epstein-Barr virus (strain B95-8) (HHV-4) (Human herpesvirus 4)	10377	Herpesvirales	Orthoherpesviridae
P03204	Epstein-Barr virus (strain B95-8) (HHV-4) (Human herpesvirus 4)	10377	Herpesvirales	Orthoherpesviridae
P03209	Epstein-Barr virus (strain B95-8) (HHV-4) (Human herpesvirus 4)	10377	Herpesvirales	Orthoherpesviridae
P03217	Epstein-Barr virus (strain B95-8) (HHV-4) (Human herpesvirus 4)	10377	Herpesvirales	Orthoherpesviridae
P03118	Human papillomavirus type 1 (Human papillomavirus type 1a)	10583	Zurhausenvirales	Papillomaviridae
P03119	Human papillomavirus type 6b	10600	Zurhausenvirales	Papillomaviridae
P03203	Epstein-Barr virus (strain B95-8) (HHV-4) (Human herpesvirus 4)	10377	Herpesvirales	Orthoherpesviridae
P68336	Human herpesvirus 2 (strain HG52) (HHV-2) (Human herpes simplex virus 2)	10315	Herpesvirales	Orthoherpesviridae
P30117	Epstein-Barr virus (strain B95-8) (HHV-4) (Human herpesvirus 4)	10377	Herpesvirales	Orthoherpesviridae
P03207	Epstein-Barr virus (strain B95-8) (HHV-4) (Human herpesvirus 4)	10377	Herpesvirales	Orthoherpesviridae
P03222	Epstein-Barr virus (strain B95-8) (HHV-4) (Human herpesvirus 4)	10377	Herpesvirales	Orthoherpesviridae
K9N5R3	Middle East respiratory syndrome-related coronavirus (isolate United Kingdom/H123990006/2012) (MERS-CoV) (Betacoronavirus England 1)	1263720	Nidovirales	Coronaviridae
F5HB81	Human herpesvirus 8 type P (isolate GK18) (HHV-8) (Kaposi's sarcoma-associated herpesvirus)	868565	Herpesvirales	Orthoherpesviridae
K9N7A1	Middle East respiratory syndrome-related coronavirus (isolate United Kingdom/H123990006/2012) (MERS-CoV) (Betacoronavirus England 1)	1263720	Nidovirales	Coronaviridae
F5HB53	Human cytomegalovirus (strain Merlin) (HHV-5) (Human herpesvirus 5)	295027	Herpesvirales	Orthoherpesviridae
F5HGJ3	Human herpesvirus 8 type P (isolate GK18) (HHV-8) (Kaposi's sarcoma-associated herpesvirus)	868565	Herpesvirales	Orthoherpesviridae
K9N643	Middle East respiratory syndrome-related coronavirus (isolate United Kingdom/H123990006/2012) (MERS-CoV) (Betacoronavirus England 1)	1263720	Nidovirales	Coronaviridae
F5HAM0	Human cytomegalovirus (strain Merlin) (HHV-5) (Human herpesvirus 5)	295027	Herpesvirales	Orthoherpesviridae
F5HE05	Human cytomegalovirus (strain Merlin) (HHV-5) (Human herpesvirus 5)	295027	Herpesvirales	Orthoherpesviridae
F5HE12	Human cytomegalovirus (strain Merlin) (HHV-5) (Human herpesvirus 5)	295027	Herpesvirales	Orthoherpesviridae
F5HF44	Human cytomegalovirus (strain Merlin) (HHV-5) (Human herpesvirus 5)	295027	Herpesvirales	Orthoherpesviridae
F5HEU0	Human cytomegalovirus (strain Merlin) (HHV-5) (Human herpesvirus 5)	295027	Herpesvirales	Orthoherpesviridae
F5HGQ8	Human cytomegalovirus (strain Merlin) (HHV-5) (Human herpesvirus 5)	295027	Herpesvirales	Orthoherpesviridae
F5HAQ7	Human cytomegalovirus (strain Merlin) (HHV-5) (Human herpesvirus 5)	295027	Herpesvirales	Orthoherpesviridae
F5HC97	Human cytomegalovirus (strain Merlin) (HHV-5) (Human herpesvirus 5)	295027	Herpesvirales	Orthoherpesviridae
F5HFD2	Human herpesvirus 8 type P (isolate GK18) (HHV-8) (Kaposi's sarcoma-associated herpesvirus)	868565	Herpesvirales	Orthoherpesviridae
F5HI85	Human cytomegalovirus (strain Merlin) (HHV-5) (Human herpesvirus 5)	295027	Herpesvirales	Orthoherpesviridae
K9N796	Middle East respiratory syndrome-related coronavirus (isolate United Kingdom/H123990006/2012) (MERS-CoV) (Betacoronavirus England 1)	1263720	Nidovirales	Coronaviridae
F5HB40	Human cytomegalovirus (strain Merlin) (HHV-5) (Human herpesvirus 5)	295027	Herpesvirales	Orthoherpesviridae
G9I221	Human herpesvirus 2 (HHV-2) (Human herpes simplex virus 2)	10310	Herpesvirales	Orthoherpesviridae
K9URF1	Epstein-Barr virus (strain GD1) (HHV-4) (Human gammaherpesvirus 4)	10376	Herpesvirales	Orthoherpesviridae
P21605	Vaccinia virus (strain Western Reserve) (VACV) (Vaccinia virus (strain WR))	10254	Chitovirales	Poxviridae
P10220	Human herpesvirus 1 (strain 17) (HHV-1) (Human herpes simplex virus 1)	10299	Herpesvirales	Orthoherpesviridae
P36720	Human papillomavirus type 10	333759	Zurhausenvirales	Papillomaviridae
P24768	Vaccinia virus (strain Western Reserve) (VACV) (Vaccinia virus (strain WR))	10254	Chitovirales	Poxviridae
P24356	Vaccinia virus (strain Western Reserve) (VACV) (Vaccinia virus (strain WR))	10254	Chitovirales	Poxviridae
P06423	Human papillomavirus 33	10586	Zurhausenvirales	Papillomaviridae
P28282	Human herpesvirus 2 (strain HG52) (HHV-2) (Human herpes simplex virus 2)	10315	Herpesvirales	Orthoherpesviridae
P06921	Human papillomavirus 5	333923	Zurhausenvirales	Papillomaviridae
P27555	Human papillomavirus type 41	10589	Zurhausenvirales	Papillomaviridae
P31037	Vaccinia virus (strain Western Reserve) (VACV) (Vaccinia virus (strain WR))	10254	Chitovirales	Poxviridae
Q81019	Human papillomavirus type 54	1671798	Zurhausenvirales	Papillomaviridae
P21736	Human papillomavirus 45	10593	Zurhausenvirales	Papillomaviridae
Q6SW04	Human cytomegalovirus (strain Merlin) (HHV-5) (Human herpesvirus 5)	295027	Herpesvirales	Orthoherpesviridae
P06422	Human papillomavirus type 8	10579	Zurhausenvirales	Papillomaviridae
P21735	Human papillomavirus 45	10593	Zurhausenvirales	Papillomaviridae
P36780	Human papillomavirus 9	10621	Zurhausenvirales	Papillomaviridae
P0DKA6	Human papillomavirus type 18	333761	Zurhausenvirales	Papillomaviridae
A0A5J6DVN1	Human herpesvirus 1 (HHV-1) (Human herpes simplex virus 1)	10298	Herpesvirales	Orthoherpesviridae
G9I280	Human herpesvirus 2 (HHV-2) (Human herpes simplex virus 2)	10310	Herpesvirales	Orthoherpesviridae
Q6QCN2	Human herpesvirus 3 (HHV-3) (Varicella-zoster virus)	10335	Herpesvirales	Orthoherpesviridae
P10226	Human herpesvirus 1 (strain 17) (HHV-1) (Human herpes simplex virus 1)	10299	Herpesvirales	Orthoherpesviridae
P10238	Human herpesvirus 1 (strain 17) (HHV-1) (Human herpes simplex virus 1)	10299	Herpesvirales	Orthoherpesviridae
P08543	Human herpesvirus 1 (strain 17) (HHV-1) (Human herpes simplex virus 1)	10299	Herpesvirales	Orthoherpesviridae
P18094	Human immunodeficiency virus type 2 subtype A (isolate BEN) (HIV-2)	11714	Ortervirales	Retroviridae
P10230	Human herpesvirus 1 (strain 17) (HHV-1) (Human herpes simplex virus 1)	10299	Herpesvirales	Orthoherpesviridae
P09258	Varicella-zoster virus (strain Dumas) (HHV-3) (Human herpesvirus 3)	10338	Herpesvirales	Orthoherpesviridae
P09310	Varicella-zoster virus (strain Dumas) (HHV-3) (Human herpesvirus 3)	10338	Herpesvirales	Orthoherpesviridae
P10233	Human herpesvirus 1 (strain 17) (HHV-1) (Human herpes simplex virus 1)	10299	Herpesvirales	Orthoherpesviridae
P09255	Varicella-zoster virus (strain Dumas) (HHV-3) (Human herpesvirus 3)	10338	Herpesvirales	Orthoherpesviridae
P06485	Human herpesvirus 1 (strain 17) (HHV-1) (Human herpes simplex virus 1)	10299	Herpesvirales	Orthoherpesviridae
P10240	Human herpesvirus 1 (strain 17) (HHV-1) (Human herpes simplex virus 1)	10299	Herpesvirales	Orthoherpesviridae
P0C6Z5	Epstein-Barr virus (strain GD1) (HHV-4) (Human gammaherpesvirus 4)	10376	Herpesvirales	Orthoherpesviridae
P0CK55	Epstein-Barr virus (strain GD1) (HHV-4) (Human gammaherpesvirus 4)	10376	Herpesvirales	Orthoherpesviridae
P06418	Human papillomavirus 33	10586	Zurhausenvirales	Papillomaviridae
P0C6Z4	Epstein-Barr virus (strain GD1) (HHV-4) (Human gammaherpesvirus 4)	10376	Herpesvirales	Orthoherpesviridae
P10201	Human herpesvirus 1 (strain 17) (HHV-1) (Human herpes simplex virus 1)	10299	Herpesvirales	Orthoherpesviridae
P18097	Human immunodeficiency virus type 2 subtype A (isolate BEN) (HIV-2)	11714	Ortervirales	Retroviridae
P18098	Human immunodeficiency virus type 2 subtype A (isolate BEN) (HIV-2)	11714	Ortervirales	Retroviridae
P17384	Human papillomavirus 31	10585	Zurhausenvirales	Papillomaviridae
Q7TFA0	Severe acute respiratory syndrome coronavirus (SARS-CoV)	694009	Nidovirales	Coronaviridae
P06463	Human papillomavirus type 18	333761	Zurhausenvirales	Papillomaviridae
Q9WMX2	Hepatitis C virus genotype 1b (isolate Con1) (HCV)	333284	Amarillovirales	Flaviviridae
P03122	Bovine papillomavirus type 1	337052	Zurhausenvirales	Papillomaviridae
P89079	Human adenovirus D serotype 9 (HAdV-9) (Human adenovirus 9)	10527	Rowavirales	Adenoviridae
P03407	Human immunodeficiency virus type 1 group M subtype B (isolate ARV2/SF2) (HIV-1)	11685	Ortervirales	Retroviridae
P12504	Human immunodeficiency virus type 1 group M subtype B (isolate NY5) (HIV-1)	11698	Ortervirales	Retroviridae
P27958	Hepatitis C virus genotype 1a (isolate H77) (HCV)	63746	Amarillovirales	Flaviviridae
P06788	Human papillomavirus type 18	333761	Zurhausenvirales	Papillomaviridae
P13285	Epstein-Barr virus (strain B95-8) (HHV-4) (Human herpesvirus 4)	10377	Herpesvirales	Orthoherpesviridae
O12160	Human immunodeficiency virus type 1 group M subtype C (isolate 92BR025) (HIV-1)	388812	Ortervirales	Retroviridae
P10236	Human herpesvirus 1 (strain 17) (HHV-1) (Human herpes simplex virus 1)	10299	Herpesvirales	Orthoherpesviridae
P06931	Bovine papillomavirus type 1	337052	Zurhausenvirales	Papillomaviridae
P10193	Human herpesvirus 1 (strain 17) (HHV-1) (Human herpes simplex virus 1)	10299	Herpesvirales	Orthoherpesviridae
P03081	Simian virus 40 (SV40)	1891767	Sepolyvirales	Polyomaviridae
P06790	Human papillomavirus type 18	333761	Zurhausenvirales	Papillomaviridae
P22575	Saimiriine herpesvirus 2 (strain 488) (SaHV-2) (Herpesvirus saimiri)	10384	Herpesvirales	Orthoherpesviridae
P06465	Human papillomavirus type 1 (Human papillomavirus type 1a)	10583	Zurhausenvirales	Papillomaviridae
P10212	Human herpesvirus 1 (strain 17) (HHV-1) (Human herpes simplex virus 1)	10299	Herpesvirales	Orthoherpesviridae
P69616	Hepatitis E virus genotype 1 (isolate Human/Burma) (HEV-1)	31767	Hepelivirales	Hepeviridae
Q6SW46	Human cytomegalovirus (strain Merlin) (HHV-5) (Human herpesvirus 5)	295027	Herpesvirales	Orthoherpesviridae
O92972	Hepatitis C virus genotype 1b (strain HC-J4) (HCV)	420174	Amarillovirales	Flaviviridae
Q8AZK7	Epstein-Barr virus (strain B95-8) (HHV-4) (Human herpesvirus 4)	10377	Herpesvirales	Orthoherpesviridae
P26663	Hepatitis C virus genotype 1b (isolate BK) (HCV)	11105	Amarillovirales	Flaviviridae
P29846	Hepatitis C virus genotype 1b (isolate Taiwan) (HCV)	31645	Amarillovirales	Flaviviridae
P11207	Parainfluenza virus 5 (strain W3) (PIV5) (Simian virus 5)	11208	Mononegavirales	Paramyxoviridae
Q99IB8	Hepatitis C virus genotype 2a (isolate JFH-1) (HCV)	356411	Amarillovirales	Flaviviridae
Q03463	Hepatitis C virus genotype 1b (isolate HC-J1) (HCV)	421877	Amarillovirales	Flaviviridae
P0C739	Epstein-Barr virus (strain B95-8) (HHV-4) (Human herpesvirus 4)	10377	Herpesvirales	Orthoherpesviridae
P12977	Epstein-Barr virus (strain B95-8) (HHV-4) (Human herpesvirus 4)	10377	Herpesvirales	Orthoherpesviridae
Q64770	Fowl adenovirus A serotype 1 (strain CELO / Phelps) (FAdV-1) (Avian adenovirus gal1 (strain Phelps))	10553	Rowavirales	Adenoviridae
P03179	Epstein-Barr virus (strain B95-8) (HHV-4) (Human herpesvirus 4)	10377	Herpesvirales	Orthoherpesviridae
P17361	Vaccinia virus (strain Western Reserve) (VACV) (Vaccinia virus (strain WR))	10254	Chitovirales	Poxviridae
P20639	Vaccinia virus (strain Copenhagen) (VACV)	10249	Chitovirales	Poxviridae
P68467	Vaccinia virus (strain Copenhagen) (VACV)	10249	Chitovirales	Poxviridae
P68451	Vaccinia virus (strain L-IVP) (VACV)	31531	Chitovirales	Poxviridae
Q77E16	Human papillomavirus type 16	333760	Zurhausenvirales	Papillomaviridae
O39474	Hepacivirus hominis	3052230	Amarillovirales	Flaviviridae
A7Y3Z3	Human papillomavirus type 16	333760	Zurhausenvirales	Papillomaviridae
Q8JSK4	Human adenovirus B serotype 3 (HAdV-3) (Human adenovirus 3)	45659	Rowavirales	Adenoviridae
Q8UYL3	Vaccinia virus (VACV) (Orthopoxvirus vaccinia)	10245	Chitovirales	Poxviridae
P26554	Human papillomavirus 51	10595	Zurhausenvirales	Papillomaviridae
Q6Q1S2	Human coronavirus NL63 (HCoV-NL63)	277944	Nidovirales	Coronaviridae
P14340	Dengue virus type 2 (strain Thailand/NGS-C/1944) (DENV-2)	11065	Amarillovirales	Flaviviridae
Q77CE4	Bovine herpesvirus 1.1 (strain Cooper) (BoHV-1) (Infectious bovine rhinotracheitis virus)	10323	Herpesvirales	Orthoherpesviridae
P27228	Human papillomavirus 35	10587	Zurhausenvirales	Papillomaviridae
P03427	Influenza A virus (strain A/Wilson-Smith/1933 H1N1) (Influenza A virus (strain A/WS/1933 H1N1))	381518	Articulavirales	Orthomyxoviridae
P03496	Influenza A virus (strain A/Puerto Rico/8/1934 H1N1)	211044	Articulavirales	Orthomyxoviridae
Q5EP34	Influenza A virus (strain A/Vietnam/1203/2004 H5N1)	284218	Articulavirales	Orthomyxoviridae
P06935	West Nile virus (WNV)	11082	Amarillovirales	Flaviviridae
P0C6U8	Severe acute respiratory syndrome coronavirus (SARS-CoV)	694009	Nidovirales	Coronaviridae
P69699	Human immunodeficiency virus type 1 group M subtype B (isolate BH10) (HIV-1)	11678	Ortervirales	Retroviridae
Q05906	Equine herpesvirus 1 (strain Kentucky A) (EHV-1) (Equine abortion virus)	10329	Herpesvirales	Orthoherpesviridae
P0DOF2	Rabies virus (strain ERA) (RABV)	11295	Mononegavirales	Rhabdoviridae
P89884	Murid herpesvirus 4 (MuHV-4) (Murine gammaherpesvirus 68)	33708	Herpesvirales	Orthoherpesviridae
K0BWD0	Human betacoronavirus 2c (isolate EMC/2012) (HCoV-EMC)	1235996	Nidovirales	Coronaviridae
Q77YB1	Human respiratory syncytial virus A (strain A2)	11259	Mononegavirales	Pneumoviridae
Q72497	Human immunodeficiency virus type 1 (HIV-1)	11676	Ortervirales	Retroviridae
Q6UPD4	SARS coronavirus HB	253634	Nidovirales	Coronaviridae
Q66479	Human enterovirus 71 (strain 7423/MS/87) (EV71) (EV-71)	103922	Picornavirales	Picornaviridae
P19712	Classical swine fever virus (strain Alfort/Tuebingen) (CSFV) (Hog cholera virus)	358805	Amarillovirales	Flaviviridae
P04488	Human herpesvirus 1 (strain 17) (HHV-1) (Human herpes simplex virus 1)	10299	Herpesvirales	Orthoherpesviridae
Q9WC28	Hepatitis E virus genotype 1 (isolate Human/India/Hyderabad) (HEV-1)	512346	Hepelivirales	Hepeviridae
P17150	Human cytomegalovirus (strain AD169) (HHV-5) (Human herpesvirus 5)	10360	Herpesvirales	Orthoherpesviridae
P06932	Human papillomavirus 5	333923	Zurhausenvirales	Papillomaviridae
P10224	Human herpesvirus 1 (strain 17) (HHV-1) (Human herpes simplex virus 1)	10299	Herpesvirales	Orthoherpesviridae
P0C6N0	Epstein-Barr virus (strain AG876) (HHV-4) (Human herpesvirus 4)	82830	Herpesvirales	Orthoherpesviridae
P14357	Vaccinia virus (strain Western Reserve) (VACV) (Vaccinia virus (strain WR))	10254	Chitovirales	Poxviridae
P36801	Human papillomavirus 9	10621	Zurhausenvirales	Papillomaviridae
Q88489	Tick-borne encephalitis virus	11084	Amarillovirales	Flaviviridae
Q91NH1	Dengue virus type 1 (DENV-1)	11053	Amarillovirales	Flaviviridae
K0BRG7	Human betacoronavirus 2c (isolate EMC/2012) (HCoV-EMC)	1235996	Nidovirales	Coronaviridae
P10229	Human herpesvirus 1 (strain 17) (HHV-1) (Human herpes simplex virus 1)	10299	Herpesvirales	Orthoherpesviridae
P17367	Vaccinia virus (strain Western Reserve) (VACV) (Vaccinia virus (strain WR))	10254	Chitovirales	Poxviridae
Q69140	Epstein-Barr virus (strain AG876) (HHV-4) (Human herpesvirus 4)	82830	Herpesvirales	Orthoherpesviridae
A0A060A633	Hepatitis B virus (HBV)	10407	Blubervirales	Hepadnaviridae
Q8JSN5	Influenza A virus (A/Paris/908/97(H3N2))	158611	Articulavirales	Orthomyxoviridae
Q8JSN6	Influenza A virus (A/Paris/908/97(H3N2))	158611	Articulavirales	Orthomyxoviridae
Q9DUN1	Human herpesvirus 8 (HHV-8) (Kaposi's sarcoma-associated herpesvirus)	37296	Herpesvirales	Orthoherpesviridae
P03433	Influenza A virus (strain A/Puerto Rico/8/1934 H1N1)	211044	Articulavirales	Orthomyxoviridae
P08411	Semliki forest virus (SFV)	11033	Martellivirales	Togaviridae
Q85601	Human T-cell leukemia virus 2 (HTLV-2)	11909	Ortervirales	Retroviridae
P03410	Human T-cell leukemia virus 2 (HTLV-2)	11909	Ortervirales	Retroviridae
P0C206	Human T-cell leukemia virus 1 (isolate Caribbea HS-35 subtype A) (HTLV-1)	11927	Ortervirales	Retroviridae
P04620	Human immunodeficiency virus type 1 group M subtype B (isolate BRU/LAI) (HIV-1)	11686	Ortervirales	Retroviridae
P06477	Human herpesvirus 1 (strain 17) (HHV-1) (Human herpes simplex virus 1)	10299	Herpesvirales	Orthoherpesviridae
P03508	Influenza A virus (strain A/Puerto Rico/8/1934 H1N1)	211044	Articulavirales	Orthomyxoviridae
P24830	Human papillomavirus 39	10588	Zurhausenvirales	Papillomaviridae
P16494	Bunyamwera virus (BUNV)	35304	Elliovirales	Peribunyaviridae
Q9E7P0	Dengue virus type 2 (DENV-2)	11060	Amarillovirales	Flaviviridae
Q0A2H1	Influenza A virus (strain A/Chicken/Scotland/1959 H5N1)	402527	Articulavirales	Orthomyxoviridae
Q2PJP0	Influenza A virus (A/chicken/Kurgan/3/2005(H5N1))	363744	Articulavirales	Orthomyxoviridae
Q2PJP1	Influenza A virus (A/chicken/Kurgan/3/2005(H5N1))	363744	Articulavirales	Orthomyxoviridae
A6YJF2	Influenza A virus (A/migratory duck/Hong Kong/MPS180/2003(H4N6))	442553	Articulavirales	Orthomyxoviridae
Q20MD1	Influenza A virus (strain A/Udorn/1972 H3N2)	385599	Articulavirales	Orthomyxoviridae
R9WKI0	Influenza A virus (A/Puerto Rico/8-LVD3/1934(H1N1))	1343791	Articulavirales	Orthomyxoviridae
Q20MH4	Influenza A virus (strain A/Wilson-Smith/1933 H1N1) (Influenza A virus (strain A/WS/1933 H1N1))	381518	Articulavirales	Orthomyxoviridae
Q6DP94	Influenza A virus (A/Vietnam/1194/2004(H5N1))	644788	Articulavirales	Orthomyxoviridae
Q6VE52	Influenza A virus (A/chicken/Netherlands/1/03(H7N7))	251307	Articulavirales	Orthomyxoviridae
Q6J8G2	Hepatitis E virus genotype 3 (isolate Swine/United States/swUS1) (HEV-3) (Hepatitis E virus genotype 3 (isolate Swine/United States/Meng))	512345	Hepelivirales	Hepeviridae
Q76R61	Hepatitis B virus genotype C subtype ayr (isolate Human/Japan/Okamoto/-) (HBV-C)	928302	Blubervirales	Hepadnaviridae
P03466	Influenza A virus (strain A/Puerto Rico/8/1934 H1N1)	211044	Articulavirales	Orthomyxoviridae
P04288	Human herpesvirus 1 (strain 17) (HHV-1) (Human herpes simplex virus 1)	10299	Herpesvirales	Orthoherpesviridae
Q1HVG1	Epstein-Barr virus (strain AG876) (HHV-4) (Human herpesvirus 4)	82830	Herpesvirales	Orthoherpesviridae
P10217	Human herpesvirus 1 (strain 17) (HHV-1) (Human herpes simplex virus 1)	10299	Herpesvirales	Orthoherpesviridae
P36778	Human papillomavirus 3	10614	Zurhausenvirales	Papillomaviridae
P23372	Vaccinia virus (strain Western Reserve) (VACV) (Vaccinia virus (strain WR))	10254	Chitovirales	Poxviridae
P36791	Human papillomavirus type 32	333763	Zurhausenvirales	Papillomaviridae
P36817	Human papillomavirus 9	10621	Zurhausenvirales	Papillomaviridae
Q1H8W6	Chikungunya virus (CHIKV)	37124	Martellivirales	Togaviridae
O09234	Dengue virus type 2 (strain Thailand/16681/1984) (DENV-2)	31634	Amarillovirales	Flaviviridae
P10239	Human herpesvirus 1 (strain 17) (HHV-1) (Human herpes simplex virus 1)	10299	Herpesvirales	Orthoherpesviridae
Q1HVG4	Epstein-Barr virus (strain AG876) (HHV-4) (Human herpesvirus 4)	82830	Herpesvirales	Orthoherpesviridae
Q1HVI8	Epstein-Barr virus (strain AG876) (HHV-4) (Human herpesvirus 4)	82830	Herpesvirales	Orthoherpesviridae
Q20MD2	Influenza A virus (strain A/Udorn/1972 H3N2)	385599	Articulavirales	Orthomyxoviridae
P88983	Murid herpesvirus 4 (MuHV-4) (Murine gammaherpesvirus 68)	33708	Herpesvirales	Orthoherpesviridae
O41947	Murid herpesvirus 4 (MuHV-4) (Murine gammaherpesvirus 68)	33708	Herpesvirales	Orthoherpesviridae
Q2KRY7	Human adenovirus C serotype 5 (HAdV-5) (Human adenovirus 5)	28285	Rowavirales	Adenoviridae
P88987	Murid herpesvirus 4 (MuHV-4) (Murine gammaherpesvirus 68)	33708	Herpesvirales	Orthoherpesviridae
P03322	Rous sarcoma virus subgroup C (strain Prague) (RSV-Pr-C)	11888	Ortervirales	Retroviridae
P04298	Vaccinia virus (strain Western Reserve) (VACV) (Vaccinia virus (strain WR))	10254	Chitovirales	Poxviridae
P14079	Human T-cell leukemia virus 1 (isolate Caribbea HS-35 subtype A) (HTLV-1)	11927	Ortervirales	Retroviridae
P14335	Kunjin virus (strain MRM61C)	11078	Amarillovirales	Flaviviridae
P06929	Human papillomavirus type 1 (Human papillomavirus type 1a)	10583	Zurhausenvirales	Papillomaviridae
P10204	Human herpesvirus 1 (strain 17) (HHV-1) (Human herpes simplex virus 1)	10299	Herpesvirales	Orthoherpesviridae
Q9WMB4	Measles virus (strain Ichinose-B95a) (MeV) (Subacute sclerose panencephalitis virus)	645098	Mononegavirales	Paramyxoviridae
Q8QXP6	Japanese encephalitis virus (JEV)	11072	Amarillovirales	Flaviviridae
P0C737	Epstein-Barr virus (strain AG876) (HHV-4) (Human herpesvirus 4)	82830	Herpesvirales	Orthoherpesviridae
Q20P38	Influenza A virus (strain A/Equine/Prague/1/1956 H7N7)	380337	Articulavirales	Orthomyxoviridae
P0CK48	Epstein-Barr virus (strain AG876) (HHV-4) (Human herpesvirus 4)	82830	Herpesvirales	Orthoherpesviridae
Q1K9H5	Influenza A virus (strain A/Wilson-Smith/1933 H1N1) (Influenza A virus (strain A/WS/1933 H1N1))	381518	Articulavirales	Orthomyxoviridae
Q77UU1	Human papillomavirus type 6	31552	Zurhausenvirales	Papillomaviridae
Q8JSN8	Influenza A virus (A/Paris/908/97(H3N2))	158611	Articulavirales	Orthomyxoviridae
Q76Z97	Human papillomavirus type 18	333761	Zurhausenvirales	Papillomaviridae
Q1HVB5	Epstein-Barr virus (strain AG876) (HHV-4) (Human herpesvirus 4)	82830	Herpesvirales	Orthoherpesviridae
P0CK57	Epstein-Barr virus (strain AG876) (HHV-4) (Human herpesvirus 4)	82830	Herpesvirales	Orthoherpesviridae
P88993	Murid herpesvirus 4 (MuHV-4) (Murine gammaherpesvirus 68)	33708	Herpesvirales	Orthoherpesviridae
O41949	Murid herpesvirus 4 (MuHV-4) (Murine gammaherpesvirus 68)	33708	Herpesvirales	Orthoherpesviridae
O41958	Murid herpesvirus 4 (MuHV-4) (Murine gammaherpesvirus 68)	33708	Herpesvirales	Orthoherpesviridae
P03431	Influenza A virus (strain A/Puerto Rico/8/1934 H1N1)	211044	Articulavirales	Orthomyxoviridae
P03428	Influenza A virus (strain A/Puerto Rico/8/1934 H1N1)	211044	Articulavirales	Orthomyxoviridae
P10231	Human herpesvirus 1 (strain 17) (HHV-1) (Human herpes simplex virus 1)	10299	Herpesvirales	Orthoherpesviridae
O92551	Influenza A virus (strain A/Equine/Prague/1/1956 H7N7)	380337	Articulavirales	Orthomyxoviridae
Q0A2H0	Influenza A virus (strain A/Chicken/Scotland/1959 H5N1)	402527	Articulavirales	Orthomyxoviridae
D2E1L9	SARS coronavirus wtic-MB	698419	Nidovirales	Coronaviridae
Q1HVB8	Epstein-Barr virus (strain AG876) (HHV-4) (Human herpesvirus 4)	82830	Herpesvirales	Orthoherpesviridae
Q20MH3	Influenza A virus (strain A/Wilson-Smith/1933 H1N1) (Influenza A virus (strain A/WS/1933 H1N1))	381518	Articulavirales	Orthomyxoviridae
Q6QT26	Influenza A virus (A/Vietnam/1196/2004(H5N1))	261268	Articulavirales	Orthomyxoviridae
Q20MC8	Influenza A virus (strain A/Udorn/1972 H3N2)	385599	Articulavirales	Orthomyxoviridae
F5CGQ0	Influenza A virus (A/reassortant/CDC2005712034(California/07/2004 x Puerto Rico/8/1934)(H3N2))	997555	Articulavirales	Orthomyxoviridae
Q20MC6	Influenza A virus (strain A/Udorn/1972 H3N2)	385599	Articulavirales	Orthomyxoviridae
Q6DP93	Influenza A virus (A/Vietnam/1194/2004(H5N1))	644788	Articulavirales	Orthomyxoviridae
P90486	Human herpesvirus 8 type M	435895	Herpesvirales	Orthoherpesviridae
A0A097NZ28	Orthohantavirus seoulense	3052498	Elliovirales	Hantaviridae
Q3SBS4	Influenza A virus (A/chicken/Guangdong/6/97(H9N2))	329599	Articulavirales	Orthomyxoviridae
Q0NJW0	Variola virus	10255	Chitovirales	Poxviridae
O41970	Murid herpesvirus 4 (MuHV-4) (Murine gammaherpesvirus 68)	33708	Herpesvirales	Orthoherpesviridae
A0A5K6WAZ8	Human adenovirus C serotype 1 (HAdV-1) (Human adenovirus 1)	10533	Rowavirales	Adenoviridae
O41941	Murid herpesvirus 4 (MuHV-4) (Murine gammaherpesvirus 68)	33708	Herpesvirales	Orthoherpesviridae
P14349	Human spumaretrovirus (SFVcpz(hu)) (Human foamy virus)	11963	Ortervirales	Retroviridae
P03086	JC polyomavirus (JCPyV) (JCV)	10632	Sepolyvirales	Polyomaviridae
P14076	Human T-cell leukemia virus 1 (isolate Caribbea HS-35 subtype A) (HTLV-1)	11927	Ortervirales	Retroviridae
Q91B85	Alkhumra hemorrhagic fever virus (ALKV) (Alkhurma hemorrhagic fever virus)	172148	Amarillovirales	Flaviviridae
P03332	Moloney murine leukemia virus (isolate Shinnick) (MoMLV)	928306	Ortervirales	Retroviridae
Q76R62	Hepatitis B virus genotype C subtype ayr (isolate Human/Japan/Okamoto/-) (HBV-C)	928302	Blubervirales	Hepadnaviridae
P03255	Human adenovirus C serotype 5 (HAdV-5) (Human adenovirus 5)	28285	Rowavirales	Adenoviridae
Q1HVF7	Epstein-Barr virus (strain AG876) (HHV-4) (Human herpesvirus 4)	82830	Herpesvirales	Orthoherpesviridae
P03493	Influenza B virus (strain B/Lee/1940)	518987	Articulavirales	Orthomyxoviridae
P10228	Human herpesvirus 1 (strain 17) (HHV-1) (Human herpes simplex virus 1)	10299	Herpesvirales	Orthoherpesviridae
P36799	Human papillomavirus 3	10614	Zurhausenvirales	Papillomaviridae
P36810	Human papillomavirus type 32	333763	Zurhausenvirales	Papillomaviridae
Q805H7	Vaccinia virus (strain Western Reserve) (VACV) (Vaccinia virus (strain WR))	10254	Chitovirales	Poxviridae
P0C705	Epstein-Barr virus (strain AG876) (HHV-4) (Human herpesvirus 4)	82830	Herpesvirales	Orthoherpesviridae
P10227	Human herpesvirus 1 (strain 17) (HHV-1) (Human herpes simplex virus 1)	10299	Herpesvirales	Orthoherpesviridae
A5Z256	Influenza A virus (A/Turkey/651242/2006(H5N1))	440390	Articulavirales	Orthomyxoviridae
H9XIJ5	Influenza A virus (strain A/Victoria/3/1975 H3N2)	392809	Articulavirales	Orthomyxoviridae
Q6VGS8	Human adenovirus C serotype 5 (HAdV-5) (Human adenovirus 5)	28285	Rowavirales	Adenoviridae
A0A0C7TBS6	Epstein-Barr virus (strain GD1) (HHV-4) (Human gammaherpesvirus 4)	10376	Herpesvirales	Orthoherpesviridae
A0A0C7TA99	Epstein-Barr virus (strain GD1) (HHV-4) (Human gammaherpesvirus 4)	10376	Herpesvirales	Orthoherpesviridae
P03188	Epstein-Barr virus (strain B95-8) (HHV-4) (Human herpesvirus 4)	10377	Herpesvirales	Orthoherpesviridae
P19811	Equine arteritis virus (strain Bucyrus) (EAV)	299386	Nidovirales	Arteriviridae
P68331	Human herpesvirus 1 (strain 17) (HHV-1) (Human herpes simplex virus 1)	10299	Herpesvirales	Orthoherpesviridae
P24835	Human papillomavirus 39	10588	Zurhausenvirales	Papillomaviridae
P0C763	Epstein-Barr virus (strain AG876) (HHV-4) (Human herpesvirus 4)	82830	Herpesvirales	Orthoherpesviridae
O55777	Hendra virus (isolate Horse/Autralia/Hendra/1994)	928303	Mononegavirales	Paramyxoviridae
P0CK54	Epstein-Barr virus (strain AG876) (HHV-4) (Human herpesvirus 4)	82830	Herpesvirales	Orthoherpesviridae
P0C6Z1	Epstein-Barr virus (strain AG876) (HHV-4) (Human herpesvirus 4)	82830	Herpesvirales	Orthoherpesviridae
Q5ERI7	West Nile virus (WNV)	11082	Amarillovirales	Flaviviridae
P0C6Z9	Epstein-Barr virus (strain AG876) (HHV-4) (Human herpesvirus 4)	82830	Herpesvirales	Orthoherpesviridae
Q80HW9	Vaccinia virus (strain Western Reserve) (VACV) (Vaccinia virus (strain WR))	10254	Chitovirales	Poxviridae
P10191	Human herpesvirus 1 (strain 17) (HHV-1) (Human herpes simplex virus 1)	10299	Herpesvirales	Orthoherpesviridae
Q1I2B2	Influenza A virus (strain A/Wilson-Smith/1933 H1N1) (Influenza A virus (strain A/WS/1933 H1N1))	381518	Articulavirales	Orthomyxoviridae
E7BBT6	Human papillomavirus type 6	31552	Zurhausenvirales	Papillomaviridae
Q20MD0	Influenza A virus (strain A/Udorn/1972 H3N2)	385599	Articulavirales	Orthomyxoviridae
Q9QLP4	Human papillomavirus type 6	31552	Zurhausenvirales	Papillomaviridae
P06792	Human papillomavirus type 18	333761	Zurhausenvirales	Papillomaviridae
P0C723	Epstein-Barr virus (strain AG876) (HHV-4) (Human herpesvirus 4)	82830	Herpesvirales	Orthoherpesviridae
M1VNY3	Mumps orthorubulavirus (MuV)	2560602	Mononegavirales	Paramyxoviridae
P88980	Murid herpesvirus 4 (MuHV-4) (Murine gammaherpesvirus 68)	33708	Herpesvirales	Orthoherpesviridae
P27915	Dengue virus type 3 (strain Philippines/H87/1956) (DENV-3)	408870	Amarillovirales	Flaviviridae
Q997F2	Nipah virus	3052225	Mononegavirales	Paramyxoviridae
Q58HT7	Dengue virus type 4 (strain Philippines/H241/1956) (DENV-4)	408686	Amarillovirales	Flaviviridae
O57285	Sendai virus (strain Ohita) (SeV)	302272	Mononegavirales	Paramyxoviridae
P03105	Human papillomavirus type 1 (Human papillomavirus type 1a)	10583	Zurhausenvirales	Papillomaviridae
P04013	Human papillomavirus 11	10580	Zurhausenvirales	Papillomaviridae
P68563	Vaccinia virus (strain Western Reserve) (VACV) (Vaccinia virus (strain WR))	10254	Chitovirales	Poxviridae
A0A097PIH4	Dengue virus type 1 (DENV-1)	11053	Amarillovirales	Flaviviridae
Q9DLD6	Newcastle disease virus (strain Chicken/United States/B1/48) (NDV)	652953	Mononegavirales	Paramyxoviridae
P06486	Human herpesvirus 1 (strain 17) (HHV-1) (Human herpes simplex virus 1)	10299	Herpesvirales	Orthoherpesviridae
A0A220NMU2	Human papillomavirus type 16	333760	Zurhausenvirales	Papillomaviridae
P03296	Vaccinia virus (strain Western Reserve) (VACV) (Vaccinia virus (strain WR))	10254	Chitovirales	Poxviridae
W5QKN2	Mammalian orthorubulavirus 5	2560580	Mononegavirales	Paramyxoviridae
P88995	Murid herpesvirus 4 (MuHV-4) (Murine gammaherpesvirus 68)	33708	Herpesvirales	Orthoherpesviridae
P89653	Murid herpesvirus 4 (MuHV-4) (Murine gammaherpesvirus 68)	33708	Herpesvirales	Orthoherpesviridae
D3JIT9	Human adenovirus A serotype 18 (HAdV-18) (Human adenovirus 18)	10528	Rowavirales	Adenoviridae
Q917N9	La Piedad-Michoacan-Mexico virus (LPMV)	3052562	Mononegavirales	Paramyxoviridae
P88990	Murid herpesvirus 4 (MuHV-4) (Murine gammaherpesvirus 68)	33708	Herpesvirales	Orthoherpesviridae
Q91NG9	Tioman virus	162013	Mononegavirales	Paramyxoviridae
Q91MK2	Menangle virus	152219	Mononegavirales	Paramyxoviridae
P03317	Sindbis virus (SINV)	11034	Martellivirales	Togaviridae
P03485	Influenza A virus (strain A/Puerto Rico/8/1934 H1N1)	211044	Articulavirales	Orthomyxoviridae
P0DSV8	Variola virus	10255	Chitovirales	Poxviridae
P14075	Human T-cell leukemia virus 1 (isolate Caribbea HS-35 subtype A) (HTLV-1)	11927	Ortervirales	Retroviridae
Q1HVH9	Epstein-Barr virus (strain AG876) (HHV-4) (Human herpesvirus 4)	82830	Herpesvirales	Orthoherpesviridae
P12848	Vaccinia virus (strain Western Reserve) (VACV) (Vaccinia virus (strain WR))	10254	Chitovirales	Poxviridae
P68466	Vaccinia virus (strain Western Reserve) (VACV) (Vaccinia virus (strain WR))	10254	Chitovirales	Poxviridae
P03227	Epstein-Barr virus (strain B95-8) (HHV-4) (Human herpesvirus 4)	10377	Herpesvirales	Orthoherpesviridae
P15059	Vaccinia virus (strain Western Reserve) (VACV) (Vaccinia virus (strain WR))	10254	Chitovirales	Poxviridae
Q1K9H2	Influenza A virus (strain A/Wilson-Smith/1933 H1N1) (Influenza A virus (strain A/WS/1933 H1N1))	381518	Articulavirales	Orthomyxoviridae
Q30NB4	Influenza A virus (A/New York/238/2005(H3N2))	335361	Articulavirales	Orthomyxoviridae
A4URT5	Measles morbillivirus	11234	Mononegavirales	Paramyxoviridae
Q20MD4	Influenza A virus (strain A/Udorn/1972 H3N2)	385599	Articulavirales	Orthomyxoviridae
O41951	Murid herpesvirus 4 (MuHV-4) (Murine gammaherpesvirus 68)	33708	Herpesvirales	Orthoherpesviridae
P88991	Murid herpesvirus 4 (MuHV-4) (Murine gammaherpesvirus 68)	33708	Herpesvirales	Orthoherpesviridae
O41931	Murid herpesvirus 4 (MuHV-4) (Murine gammaherpesvirus 68)	33708	Herpesvirales	Orthoherpesviridae
O41954	Murid herpesvirus 4 (MuHV-4) (Murine gammaherpesvirus 68)	33708	Herpesvirales	Orthoherpesviridae
O41952	Murid herpesvirus 4 (MuHV-4) (Murine gammaherpesvirus 68)	33708	Herpesvirales	Orthoherpesviridae
O41964	Murid herpesvirus 4 (MuHV-4) (Murine gammaherpesvirus 68)	33708	Herpesvirales	Orthoherpesviridae
P88988	Murid herpesvirus 4 (MuHV-4) (Murine gammaherpesvirus 68)	33708	Herpesvirales	Orthoherpesviridae
P03132	Adeno-associated virus 2 (isolate Srivastava/1982) (AAV-2)	648242	Piccovirales	Parvoviridae
Q69027	Hepatitis B virus genotype C subtype ayr (isolate Human/Japan/Okamoto/-) (HBV-C)	928302	Blubervirales	Hepadnaviridae
P03208	Epstein-Barr virus (strain B95-8) (HHV-4) (Human herpesvirus 4)	10377	Herpesvirales	Orthoherpesviridae
P03200	Epstein-Barr virus (strain B95-8) (HHV-4) (Human herpesvirus 4)	10377	Herpesvirales	Orthoherpesviridae
P0C6L3	Hepatitis delta virus genotype I (isolate D380) (HDV)	31762		Kolmioviridae
Q9EMA9	Measles virus (strain Edmonston) (MeV) (Subacute sclerose panencephalitis virus)	11235	Mononegavirales	Paramyxoviridae
P06747	Rabies virus (strain Pasteur vaccins / PV) (RABV)	103929	Mononegavirales	Rhabdoviridae
P03383	Human T-cell leukemia virus 2 (HTLV-2)	11909	Ortervirales	Retroviridae
Q89268	Adeno-associated virus 2 (isolate Srivastava/1982) (AAV-2)	648242	Piccovirales	Parvoviridae
P06481	Human herpesvirus 1 (strain 17) (HHV-1) (Human herpes simplex virus 1)	10299	Herpesvirales	Orthoherpesviridae
P11158	Vaccinia virus (strain Western Reserve) (VACV) (Vaccinia virus (strain WR))	10254	Chitovirales	Poxviridae
Q805P6	Vaccinia virus (strain Western Reserve) (VACV) (Vaccinia virus (strain WR))	10254	Chitovirales	Poxviridae
Q9IBY5	Measles virus (strain Edmonston-Schwarz vaccine) (MeV) (Subacute sclerose panencephalitis virus)	132487	Mononegavirales	Paramyxoviridae
Q76SB6	Human herpesvirus 8 type M	435895	Herpesvirales	Orthoherpesviridae
Q6DPA0	Influenza A virus (A/Qa/Thailand/57/2004(H5N1))	284213	Articulavirales	Orthomyxoviridae
A0A1X9T7Z8	Cowpox virus (CPV)	10243	Chitovirales	Poxviridae
Q2Q067	Human T-cell leukemia virus type I	11908	Ortervirales	Retroviridae
Q98184	Molluscum contagiosum virus subtype 1 (MOCV) (MCVI)	10280	Chitovirales	Poxviridae
A0A2H4PJV3	Human herpesvirus 2 (HHV-2) (Human herpes simplex virus 2)	10310	Herpesvirales	Orthoherpesviridae
O56232	Bovine leukemia virus (BLV)	11901	Ortervirales	Retroviridae
P03346	Human T-cell leukemia virus 2 (HTLV-2)	11909	Ortervirales	Retroviridae
P03363	Human T-cell leukemia virus 2 (HTLV-2)	11909	Ortervirales	Retroviridae
P69722	Human immunodeficiency virus type 1 group M subtype B (isolate PCV12) (HIV-1)	11679	Ortervirales	Retroviridae
P03212	Epstein-Barr virus (strain B95-8) (HHV-4) (Human herpesvirus 4)	10377	Herpesvirales	Orthoherpesviridae
P09503	Saimiriine herpesvirus 2 (strain 11) (SaHV-2) (Herpesvirus saimiri)	10383	Herpesvirales	Orthoherpesviridae
F5HAW0	Human herpesvirus 8 type P (isolate GK18) (HHV-8) (Kaposi's sarcoma-associated herpesvirus)	868565	Herpesvirales	Orthoherpesviridae
P0C6Z3	Epstein-Barr virus (strain AG876) (HHV-4) (Human herpesvirus 4)	82830	Herpesvirales	Orthoherpesviridae
Q1HVE9	Epstein-Barr virus (strain AG876) (HHV-4) (Human herpesvirus 4)	82830	Herpesvirales	Orthoherpesviridae
P03215	Epstein-Barr virus (strain B95-8) (HHV-4) (Human herpesvirus 4)	10377	Herpesvirales	Orthoherpesviridae
Q1HVF6	Epstein-Barr virus (strain AG876) (HHV-4) (Human herpesvirus 4)	82830	Herpesvirales	Orthoherpesviridae
P03246	Human adenovirus C serotype 5 (HAdV-5) (Human adenovirus 5)	28285	Rowavirales	Adenoviridae
P10205	Human herpesvirus 1 (strain 17) (HHV-1) (Human herpes simplex virus 1)	10299	Herpesvirales	Orthoherpesviridae
P68343	Epstein-Barr virus (strain AG876) (HHV-4) (Human herpesvirus 4)	82830	Herpesvirales	Orthoherpesviridae
P03224	Epstein-Barr virus (strain B95-8) (HHV-4) (Human herpesvirus 4)	10377	Herpesvirales	Orthoherpesviridae
P88951	Human herpesvirus 8 type M	435895	Herpesvirales	Orthoherpesviridae
Q2RBU1	Influenza A virus (A/Canterbury/02/2005(H3N2))	353437	Articulavirales	Orthomyxoviridae
Q81983	Human papillomavirus 5	333923	Zurhausenvirales	Papillomaviridae
Q3KSP2	Epstein-Barr virus (strain GD1) (HHV-4) (Human gammaherpesvirus 4)	10376	Herpesvirales	Orthoherpesviridae
V5KTY7	Epstein-Barr virus (strain GD1) (HHV-4) (Human gammaherpesvirus 4)	10376	Herpesvirales	Orthoherpesviridae
O41957	Murid herpesvirus 4 (MuHV-4) (Murine gammaherpesvirus 68)	33708	Herpesvirales	Orthoherpesviridae
Q30NP4	Influenza A virus (strain A/Beijing/39/1975 H3N2)	383596	Articulavirales	Orthomyxoviridae
P27313	Puumala virus (strain Sotkamo/V-2969/81)	39002	Elliovirales	Hantaviridae
P11258	Vaccinia virus (strain Western Reserve) (VACV) (Vaccinia virus (strain WR))	10254	Chitovirales	Poxviridae
P04491	Human adenovirus A serotype 12 (HAdV-12) (Human adenovirus 12)	28282	Rowavirales	Adenoviridae
P10219	Human herpesvirus 1 (strain 17) (HHV-1) (Human herpes simplex virus 1)	10299	Herpesvirales	Orthoherpesviridae
P0CAP7	Epstein-Barr virus (strain AG876) (HHV-4) (Human herpesvirus 4)	82830	Herpesvirales	Orthoherpesviridae
Q1HVB3	Epstein-Barr virus (strain AG876) (HHV-4) (Human herpesvirus 4)	82830	Herpesvirales	Orthoherpesviridae
Q69022	Epstein-Barr virus (strain AG876) (HHV-4) (Human herpesvirus 4)	82830	Herpesvirales	Orthoherpesviridae
P03324	UR2 avian sarcoma virus (UR2SV) (Avian sarcoma virus (strain UR2))	354090	Ortervirales	Retroviridae
Q1HVH8	Epstein-Barr virus (strain AG876) (HHV-4) (Human herpesvirus 4)	82830	Herpesvirales	Orthoherpesviridae
P03189	Epstein-Barr virus (strain B95-8) (HHV-4) (Human herpesvirus 4)	10377	Herpesvirales	Orthoherpesviridae
P03232	Epstein-Barr virus (strain B95-8) (HHV-4) (Human herpesvirus 4)	10377	Herpesvirales	Orthoherpesviridae
P0C742	Epstein-Barr virus (strain AG876) (HHV-4) (Human herpesvirus 4)	82830	Herpesvirales	Orthoherpesviridae
O41969	Murid herpesvirus 4 (MuHV-4) (Murine gammaherpesvirus 68)	33708	Herpesvirales	Orthoherpesviridae
Q3SBS5	Influenza A virus (A/chicken/Guangdong/6/97(H9N2))	329599	Articulavirales	Orthomyxoviridae
A0A0C7TUY8	Epstein-Barr virus (strain GD1) (HHV-4) (Human gammaherpesvirus 4)	10376	Herpesvirales	Orthoherpesviridae
D7GMA9	Human papillomavirus 11	10580	Zurhausenvirales	Papillomaviridae
O41946	Murid herpesvirus 4 (MuHV-4) (Murine gammaherpesvirus 68)	33708	Herpesvirales	Orthoherpesviridae
Q3KSQ1	Epstein-Barr virus (strain GD1) (HHV-4) (Human gammaherpesvirus 4)	10376	Herpesvirales	Orthoherpesviridae
O41932	Murid herpesvirus 4 (MuHV-4) (Murine gammaherpesvirus 68)	33708	Herpesvirales	Orthoherpesviridae
P10186	Human herpesvirus 1 (strain 17) (HHV-1) (Human herpes simplex virus 1)	10299	Herpesvirales	Orthoherpesviridae
P03452	Influenza A virus (strain A/Puerto Rico/8/1934 H1N1)	211044	Articulavirales	Orthomyxoviridae
P0C6X9	Murine coronavirus (strain A59) (MHV-A59) (Murine hepatitis virus)	11142	Nidovirales	Coronaviridae
P06927	Human papillomavirus type 16	333760	Zurhausenvirales	Papillomaviridae
P10225	Human herpesvirus 1 (strain 17) (HHV-1) (Human herpes simplex virus 1)	10299	Herpesvirales	Orthoherpesviridae
Q1HVH2	Epstein-Barr virus (strain AG876) (HHV-4) (Human herpesvirus 4)	82830	Herpesvirales	Orthoherpesviridae
Q80908	Human papillomavirus 38	37959	Zurhausenvirales	Papillomaviridae
P03281	Human adenovirus C serotype 5 (HAdV-5) (Human adenovirus 5)	28285	Rowavirales	Adenoviridae
P06491	Human herpesvirus 1 (strain 17) (HHV-1) (Human herpes simplex virus 1)	10299	Herpesvirales	Orthoherpesviridae
Q1HVD1	Epstein-Barr virus (strain AG876) (HHV-4) (Human herpesvirus 4)	82830	Herpesvirales	Orthoherpesviridae
Q80907	Human papillomavirus 38	37959	Zurhausenvirales	Papillomaviridae
P03177	Epstein-Barr virus (strain B95-8) (HHV-4) (Human herpesvirus 4)	10377	Herpesvirales	Orthoherpesviridae
P0C744	Epstein-Barr virus (strain AG876) (HHV-4) (Human herpesvirus 4)	82830	Herpesvirales	Orthoherpesviridae
P24766	Vaccinia virus (strain Western Reserve) (VACV) (Vaccinia virus (strain WR))	10254	Chitovirales	Poxviridae
Q66674	Equine herpesvirus 2 (strain 86/87) (EHV-2)	82831	Herpesvirales	Orthoherpesviridae
Q38SR2	Influenza A virus (A/Hong Kong/43/1975(H3N2))	351266	Articulavirales	Orthomyxoviridae
O41956	Murid herpesvirus 4 (MuHV-4) (Murine gammaherpesvirus 68)	33708	Herpesvirales	Orthoherpesviridae
P88996	Murid herpesvirus 4 (MuHV-4) (Murine gammaherpesvirus 68)	33708	Herpesvirales	Orthoherpesviridae
Q9ICL0	Kappapapillomavirus 2	10623	Zurhausenvirales	Papillomaviridae
P88986	Murid herpesvirus 4 (MuHV-4) (Murine gammaherpesvirus 68)	33708	Herpesvirales	Orthoherpesviridae
P10210	Human herpesvirus 1 (strain 17) (HHV-1) (Human herpes simplex virus 1)	10299	Herpesvirales	Orthoherpesviridae
Q9IH62	Nipah virus	3052225	Mononegavirales	Paramyxoviridae
P29128	Bovine herpesvirus 1.1 (strain Cooper) (BoHV-1) (Infectious bovine rhinotracheitis virus)	10323	Herpesvirales	Orthoherpesviridae
Q04360	Epstein-Barr virus (strain B95-8) (HHV-4) (Human herpesvirus 4)	10377	Herpesvirales	Orthoherpesviridae
P03247	Human adenovirus C serotype 2 (HAdV-2) (Human adenovirus 2)	10515	Rowavirales	Adenoviridae
P16749	Human cytomegalovirus (strain AD169) (HHV-5) (Human herpesvirus 5)	10360	Herpesvirales	Orthoherpesviridae
P10215	Human herpesvirus 1 (strain 17) (HHV-1) (Human herpes simplex virus 1)	10299	Herpesvirales	Orthoherpesviridae
P10218	Human herpesvirus 1 (strain 17) (HHV-1) (Human herpes simplex virus 1)	10299	Herpesvirales	Orthoherpesviridae
Q81870	Hepatitis E virus genotype 1 (isolate Human/China/HeBei/1987) (HEV)	652674	Hepelivirales	Hepeviridae
P03193	Epstein-Barr virus (strain B95-8) (HHV-4) (Human herpesvirus 4)	10377	Herpesvirales	Orthoherpesviridae
Q69138	Epstein-Barr virus (strain AG876) (HHV-4) (Human herpesvirus 4)	82830	Herpesvirales	Orthoherpesviridae
P26669	Vaccinia virus (strain Western Reserve) (VACV) (Vaccinia virus (strain WR))	10254	Chitovirales	Poxviridae
P25214	Epstein-Barr virus (strain B95-8) (HHV-4) (Human herpesvirus 4)	10377	Herpesvirales	Orthoherpesviridae
P68710	Vaccinia virus (strain Western Reserve) (VACV) (Vaccinia virus (strain WR))	10254	Chitovirales	Poxviridae
A0A384KQ78	Human papillomavirus type 16	333760	Zurhausenvirales	Papillomaviridae
O41962	Murid herpesvirus 4 (MuHV-4) (Murine gammaherpesvirus 68)	33708	Herpesvirales	Orthoherpesviridae
A0A0C7TRZ7	Epstein-Barr virus (strain GD1) (HHV-4) (Human gammaherpesvirus 4)	10376	Herpesvirales	Orthoherpesviridae
P88992	Murid herpesvirus 4 (MuHV-4) (Murine gammaherpesvirus 68)	33708	Herpesvirales	Orthoherpesviridae
Q07041	Variola virus	10255	Chitovirales	Poxviridae
Q1HVD6	Epstein-Barr virus (strain AG876) (HHV-4) (Human herpesvirus 4)	82830	Herpesvirales	Orthoherpesviridae
P03205	Epstein-Barr virus (strain B95-8) (HHV-4) (Human herpesvirus 4)	10377	Herpesvirales	Orthoherpesviridae
P0C6Y1	Avian infectious bronchitis virus (strain Beaudette) (IBV)	11122	Nidovirales	Coronaviridae
P19893	Human cytomegalovirus (strain AD169) (HHV-5) (Human herpesvirus 5)	10360	Herpesvirales	Orthoherpesviridae
P0DOF8	Influenza A virus (strain A/Udorn/1972 H3N2)	385599	Articulavirales	Orthomyxoviridae
P51519	Bovine leukemia virus (BLV)	11901	Ortervirales	Retroviridae
P03089	JC polyomavirus (JCPyV) (JCV)	10632	Sepolyvirales	Polyomaviridae
P06821	Influenza A virus (strain A/Puerto Rico/8/1934 H1N1)	211044	Articulavirales	Orthomyxoviridae
P03113	Human papillomavirus type 6b	10600	Zurhausenvirales	Papillomaviridae
Q69028	Hepatitis B virus genotype C subtype ayr (isolate Human/Japan/Okamoto/-) (HBV-C)	928302	Blubervirales	Hepadnaviridae
Q80HV3	Vaccinia virus (strain Western Reserve) (VACV) (Vaccinia virus (strain WR))	10254	Chitovirales	Poxviridae
Q8JU44	West Nile virus (WNV)	11082	Amarillovirales	Flaviviridae
P21124	Caprine arthritis encephalitis virus (strain Cork) (CAEV-Co)	11661	Ortervirales	Retroviridae
Q1HVG2	Epstein-Barr virus (strain AG876) (HHV-4) (Human herpesvirus 4)	82830	Herpesvirales	Orthoherpesviridae
P68345	Epstein-Barr virus (strain AG876) (HHV-4) (Human herpesvirus 4)	82830	Herpesvirales	Orthoherpesviridae
Q8AZJ3	Epstein-Barr virus (strain B95-8) (HHV-4) (Human herpesvirus 4)	10377	Herpesvirales	Orthoherpesviridae
P03199	Epstein-Barr virus (strain B95-8) (HHV-4) (Human herpesvirus 4)	10377	Herpesvirales	Orthoherpesviridae
P17371	Vaccinia virus (strain Western Reserve) (VACV) (Vaccinia virus (strain WR))	10254	Chitovirales	Poxviridae
P30119	Epstein-Barr virus (strain B95-8) (HHV-4) (Human herpesvirus 4)	10377	Herpesvirales	Orthoherpesviridae
Q20MD5	Influenza A virus (strain A/Udorn/1972 H3N2)	385599	Articulavirales	Orthomyxoviridae
P88981	Murid herpesvirus 4 (MuHV-4) (Murine gammaherpesvirus 68)	33708	Herpesvirales	Orthoherpesviridae
P04305	Vaccinia virus (strain Western Reserve) (VACV) (Vaccinia virus (strain WR))	10254	Chitovirales	Poxviridae
P06789	Human papillomavirus type 18	333761	Zurhausenvirales	Papillomaviridae
P68619	Vaccinia virus (strain Western Reserve) (VACV) (Vaccinia virus (strain WR))	10254	Chitovirales	Poxviridae
Q9WMB5	Measles virus (strain Ichinose-B95a) (MeV) (Subacute sclerose panencephalitis virus)	645098	Mononegavirales	Paramyxoviridae
P13889	Rubella virus (strain Therien) (RUBV)	11045	Hepelivirales	Matonaviridae
Q65212	African swine fever virus (strain Badajoz 1971 Vero-adapted) (Ba71V) (ASFV)	10498	Asfuvirales	Asfarviridae
Q88918	Tula orthohantavirus (TULV) (Tula virus)	3052503	Elliovirales	Hantaviridae
P24935	Human adenovirus C serotype 2 (HAdV-2) (Human adenovirus 2)	10515	Rowavirales	Adenoviridae
Q80HT9	Vaccinia virus (strain Western Reserve) (VACV) (Vaccinia virus (strain WR))	10254	Chitovirales	Poxviridae
P0C569	Mokola virus (MOKV)	12538	Mononegavirales	Rhabdoviridae
P08671	Rabies virus (strain Pasteur vaccins / PV) (RABV)	103929	Mononegavirales	Rhabdoviridae
P16727	Human cytomegalovirus (strain AD169) (HHV-5) (Human herpesvirus 5)	10360	Herpesvirales	Orthoherpesviridae
Q9QR69	Human herpesvirus 8 type P (isolate GK18) (HHV-8) (Kaposi's sarcoma-associated herpesvirus)	868565	Herpesvirales	Orthoherpesviridae
H8Y6L2	Alkhumra hemorrhagic fever virus (ALKV) (Alkhurma hemorrhagic fever virus)	172148	Amarillovirales	Flaviviridae
Q88940	Walleye dermal sarcoma virus (WDSV)	39720	Ortervirales	Retroviridae
O41955	Murid herpesvirus 4 (MuHV-4) (Murine gammaherpesvirus 68)	33708	Herpesvirales	Orthoherpesviridae
P27311	Human adenovirus C serotype 2 (HAdV-2) (Human adenovirus 2)	10515	Rowavirales	Adenoviridae
J9Z5B4	Human mastadenovirus C	129951	Rowavirales	Adenoviridae
A0A220NM13	Human papillomavirus type 16	333760	Zurhausenvirales	Papillomaviridae
Q9Q2P1	Epstein-Barr virus (strain GD1) (HHV-4) (Human gammaherpesvirus 4)	10376	Herpesvirales	Orthoherpesviridae
P0DOE7	Human respiratory syncytial virus A (strain A2)	11259	Mononegavirales	Pneumoviridae
P03259	Human adenovirus A serotype 12 (HAdV-12) (Human adenovirus 12)	28282	Rowavirales	Adenoviridae
P03134	Murine minute virus (strain MVM prototype) (MVM) (Murine minute virus (strain MVM(p)))	648235	Piccovirales	Parvoviridae
P24772	Vaccinia virus (strain Western Reserve) (VACV) (Vaccinia virus (strain WR))	10254	Chitovirales	Poxviridae
P03267	Human adenovirus C serotype 2 (HAdV-2) (Human adenovirus 2)	10515	Rowavirales	Adenoviridae
Q1HVJ2	Epstein-Barr virus (strain AG876) (HHV-4) (Human herpesvirus 4)	82830	Herpesvirales	Orthoherpesviridae
P03275	Human adenovirus C serotype 2 (HAdV-2) (Human adenovirus 2)	10515	Rowavirales	Adenoviridae
P0C717	Epstein-Barr virus (strain AG876) (HHV-4) (Human herpesvirus 4)	82830	Herpesvirales	Orthoherpesviridae
P36711	Human adenovirus A serotype 12 (HAdV-12) (Human adenovirus 12)	28282	Rowavirales	Adenoviridae
P0C726	Epstein-Barr virus (strain AG876) (HHV-4) (Human herpesvirus 4)	82830	Herpesvirales	Orthoherpesviridae
P0DOT5	Variola virus (isolate Human/India/Ind3/1967) (VARV) (Smallpox virus)	587200	Chitovirales	Poxviridae
P04492	Human adenovirus A serotype 12 (HAdV-12) (Human adenovirus 12)	28282	Rowavirales	Adenoviridae
Q01043	Saimiriine herpesvirus 2 (strain 11) (SaHV-2) (Herpesvirus saimiri)	10383	Herpesvirales	Orthoherpesviridae
Q07275	Epstein-Barr virus (strain AG876) (HHV-4) (Human herpesvirus 4)	82830	Herpesvirales	Orthoherpesviridae
Q77UU2	Human papillomavirus type 6	31552	Zurhausenvirales	Papillomaviridae
Q6VGW0	Human adenovirus C serotype 5 (HAdV-5) (Human adenovirus 5)	28285	Rowavirales	Adenoviridae
B9UPF3	Human papillomavirus 11	10580	Zurhausenvirales	Papillomaviridae
V5KU41	Epstein-Barr virus (strain GD1) (HHV-4) (Human gammaherpesvirus 4)	10376	Herpesvirales	Orthoherpesviridae
O41966	Murid herpesvirus 4 (MuHV-4) (Murine gammaherpesvirus 68)	33708	Herpesvirales	Orthoherpesviridae
A0A1P7U033	Epstein-Barr virus (strain AG876) (HHV-4) (Human herpesvirus 4)	82830	Herpesvirales	Orthoherpesviridae
Q98325	Molluscum contagiosum virus subtype 1 (MOCV) (MCVI)	10280	Chitovirales	Poxviridae
P03468	Influenza A virus (strain A/Puerto Rico/8/1934 H1N1)	211044	Articulavirales	Orthomyxoviridae
P03254	Human adenovirus C serotype 2 (HAdV-2) (Human adenovirus 2)	10515	Rowavirales	Adenoviridae
F5HGH5	Human herpesvirus 8 type P (isolate GK18) (HHV-8) (Kaposi's sarcoma-associated herpesvirus)	868565	Herpesvirales	Orthoherpesviridae
P04295	Human herpesvirus 1 (strain 17) (HHV-1) (Human herpes simplex virus 1)	10299	Herpesvirales	Orthoherpesviridae
Q3ZK64	Rotavirus A (isolate RVA/Human/Belgium/B4106/2000/G3P11[14]) (RV-A) (Rotavirus A (isolate B4106))	578843	Reovirales	Sedoreoviridae
P0C6Z6	Epstein-Barr virus (strain AG876) (HHV-4) (Human herpesvirus 4)	82830	Herpesvirales	Orthoherpesviridae
Q82630	Avian infectious bursal disease virus (isolate Chicken/UK/UK661/1989) (IBDV) (Gumboro disease virus)	644440		Birnaviridae
F5HC71	Human cytomegalovirus (strain Merlin) (HHV-5) (Human herpesvirus 5)	295027	Herpesvirales	Orthoherpesviridae
P0C6Z8	Epstein-Barr virus (strain AG876) (HHV-4) (Human herpesvirus 4)	82830	Herpesvirales	Orthoherpesviridae
Q7TFA1	Severe acute respiratory syndrome coronavirus (SARS-CoV)	694009	Nidovirales	Coronaviridae
Q1K9H6	Influenza A virus (strain A/Wilson-Smith/1933 H1N1) (Influenza A virus (strain A/WS/1933 H1N1))	381518	Articulavirales	Orthomyxoviridae
P06426	Human papillomavirus 33	10586	Zurhausenvirales	Papillomaviridae
Q1HVD3	Epstein-Barr virus (strain AG876) (HHV-4) (Human herpesvirus 4)	82830	Herpesvirales	Orthoherpesviridae
Q1K9G9	Influenza A virus (strain A/Wilson-Smith/1933 H1N1) (Influenza A virus (strain A/WS/1933 H1N1))	381518	Articulavirales	Orthomyxoviridae
O41927	Murid herpesvirus 4 (MuHV-4) (Murine gammaherpesvirus 68)	33708	Herpesvirales	Orthoherpesviridae
B1A9Q8	Murine herpesvirus 72	135748	Herpesvirales	Orthoherpesviridae
K9UT94	Epstein-Barr virus (strain GD1) (HHV-4) (Human gammaherpesvirus 4)	10376	Herpesvirales	Orthoherpesviridae
O41963	Murid herpesvirus 4 (MuHV-4) (Murine gammaherpesvirus 68)	33708	Herpesvirales	Orthoherpesviridae
P88924	Human herpesvirus 8 type M	435895	Herpesvirales	Orthoherpesviridae
P13199	Saimiriine herpesvirus 2 (strain 11) (SaHV-2) (Herpesvirus saimiri)	10383	Herpesvirales	Orthoherpesviridae
P27949	African swine fever virus (strain Badajoz 1971 Vero-adapted) (Ba71V) (ASFV)	10498	Asfuvirales	Asfarviridae
P07567	Mason-Pfizer monkey virus (MPMV) (Simian Mason-Pfizer virus)	11855	Ortervirales	Retroviridae
P03416	Murine coronavirus (strain A59) (MHV-A59) (Murine hepatitis virus)	11142	Nidovirales	Coronaviridae
Q8BB25	Porcine hemagglutinating encephalomyelitis virus (strain 67N) (HEV-67N)	230237	Nidovirales	Coronaviridae
P04494	Human adenovirus C serotype 5 (HAdV-5) (Human adenovirus 5)	28285	Rowavirales	Adenoviridae
P16791	Human cytomegalovirus (strain AD169) (HHV-5) (Human herpesvirus 5)	10360	Herpesvirales	Orthoherpesviridae
P32543	Equine infectious anemia virus (isolate CL22) (EIAV)	31675	Ortervirales	Retroviridae
P68716	Vaccinia virus (strain Western Reserve) (VACV) (Vaccinia virus (strain WR))	10254	Chitovirales	Poxviridae
Q2VC93	Influenza A virus (strain A/Seal/Massachusetts/1/1980 H7N7)	384493	Articulavirales	Orthomyxoviridae
F5HDA4	Human herpesvirus 8 type P (isolate GK18) (HHV-8) (Kaposi's sarcoma-associated herpesvirus)	868565	Herpesvirales	Orthoherpesviridae
Q89270	Adeno-associated virus 2 (isolate Srivastava/1982) (AAV-2)	648242	Piccovirales	Parvoviridae
P16087	Feline immunodeficiency virus (isolate Petaluma) (FIV)	11674	Ortervirales	Retroviridae
P14739	Bacillus phage PBS2 (Bacteriophage PBS2)	10684
O09720	Human respiratory syncytial virus A (strain S-2) (HRSV-S2)	410078	Mononegavirales	Pneumoviridae
O57263	Vaccinia virus (strain Ankara) (VACV)	126794	Chitovirales	Poxviridae
P89654	Murid herpesvirus 4 (MuHV-4) (Murine gammaherpesvirus 68)	33708	Herpesvirales	Orthoherpesviridae
Q5I3N2	Bluetongue virus (BTV)	40051	Reovirales	Sedoreoviridae
O41925	Murid herpesvirus 4 (MuHV-4) (Murine gammaherpesvirus 68)	33708	Herpesvirales	Orthoherpesviridae
G9I284	Human herpesvirus 2 (HHV-2) (Human herpes simplex virus 2)	10310	Herpesvirales	Orthoherpesviridae
Q69091	Human herpesvirus 1 (strain 17) (HHV-1) (Human herpes simplex virus 1)	10299	Herpesvirales	Orthoherpesviridae
P03495	Influenza A virus (strain A/Udorn/307/1972 H3N2)	381517	Articulavirales	Orthomyxoviridae
P10211	Human herpesvirus 1 (strain 17) (HHV-1) (Human herpes simplex virus 1)	10299	Herpesvirales	Orthoherpesviridae
P69720	Human immunodeficiency virus type 1 group M subtype B (isolate BH10) (HIV-1)	11678	Ortervirales	Retroviridae
P69730	Equine infectious anemia virus (isolate 1369) (EIAV)	11670	Ortervirales	Retroviridae
O55527	Sendai virus (strain Ohita) (SeV)	302272	Mononegavirales	Paramyxoviridae
P17372	Vaccinia virus (strain Western Reserve) (VACV) (Vaccinia virus (strain WR))	10254	Chitovirales	Poxviridae
P68446	Vaccinia virus (strain Western Reserve) (VACV) (Vaccinia virus (strain WR))	10254	Chitovirales	Poxviridae
P10209	Human herpesvirus 1 (strain 17) (HHV-1) (Human herpes simplex virus 1)	10299	Herpesvirales	Orthoherpesviridae
P68600	Vaccinia virus (strain Western Reserve) (VACV) (Vaccinia virus (strain WR))	10254	Chitovirales	Poxviridae
Q20MC9	Influenza A virus (strain A/Udorn/1972 H3N2)	385599	Articulavirales	Orthomyxoviridae
M0QVI9	Human adenovirus 43	46938	Rowavirales	Adenoviridae
M0QUH6	Human adenovirus 24	46926	Rowavirales	Adenoviridae
Q98822	Human adenovirus F serotype 41 (HAdV-41) (Human adenovirus 41)	10524	Rowavirales	Adenoviridae
B9A6D9	Human adenovirus D37	52275	Rowavirales	Adenoviridae
C4P226	Human adenovirus 28	46930	Rowavirales	Adenoviridae
M0QTU7	Human adenovirus 30	46932	Rowavirales	Adenoviridae
O41939	Murid herpesvirus 4 (MuHV-4) (Murine gammaherpesvirus 68)	33708	Herpesvirales	Orthoherpesviridae
C4P224	Human adenovirus 28	46930	Rowavirales	Adenoviridae
Q8BEL4	Human adenovirus E serotype 4 (HAdV-4) (Human adenovirus 4)	28280	Rowavirales	Adenoviridae
P03409	Human T-cell leukemia virus 1 (strain Japan ATK-1 subtype A) (HTLV-1)	11926	Ortervirales	Retroviridae
P04326	Human immunodeficiency virus type 1 group M subtype B (isolate PCV12) (HIV-1)	11679	Ortervirales	Retroviridae
P0C774	Measles virus (strain Ichinose-B95a) (MeV) (Subacute sclerose panencephalitis virus)	645098	Mononegavirales	Paramyxoviridae
Q9QPN3	Human immunodeficiency virus type 1 group M subtype B (isolate Lai) (HIV-1)	290579	Ortervirales	Retroviridae
P03116	Bovine papillomavirus type 1	337052	Zurhausenvirales	Papillomaviridae
P04324	Human immunodeficiency virus type 1 group M subtype B (isolate PCV12) (HIV-1)	11679	Ortervirales	Retroviridae
Q2HRB6	Human herpesvirus 8 type P (isolate GK18) (HHV-8) (Kaposi's sarcoma-associated herpesvirus)	868565	Herpesvirales	Orthoherpesviridae
P29991	Dengue virus type 2 (strain 16681-PDK53) (DENV-2)	31635	Amarillovirales	Flaviviridae
P69700	Human immunodeficiency virus type 1 group M subtype B (isolate HXB3) (HIV-1)	11707	Ortervirales	Retroviridae
P69721	Human immunodeficiency virus type 1 group M subtype B (isolate BRU/LAI) (HIV-1)	11686	Ortervirales	Retroviridae
Q77M19	Measles virus (strain Edmonston-Schwarz vaccine) (MeV) (Subacute sclerose panencephalitis virus)	132487	Mononegavirales	Paramyxoviridae
P03182	Epstein-Barr virus (strain B95-8) (HHV-4) (Human herpesvirus 4)	10377	Herpesvirales	Orthoherpesviridae
P00524	Rous sarcoma virus subgroup A (strain Schmidt-Ruppin) (RSV-SR-A)	269446	Ortervirales	Retroviridae
P08160	Autographa californica nuclear polyhedrosis virus (AcMNPV)	46015	Lefavirales	Baculoviridae
Q4AE16	Hepatitis B virus (HBV)	10407	Blubervirales	Hepadnaviridae
Q8V1H6	Hepatitis B virus (HBV)	10407	Blubervirales	Hepadnaviridae
Q77YG0	Human immunodeficiency virus type 1 (HIV-1)	11676	Ortervirales	Retroviridae
P0C722	Epstein-Barr virus (strain GD1) (HHV-4) (Human gammaherpesvirus 4)	10376	Herpesvirales	Orthoherpesviridae
O92837	Simian virus 40 (SV40)	1891767	Sepolyvirales	Polyomaviridae
Q98147	Human herpesvirus 8 (HHV-8) (Kaposi's sarcoma-associated herpesvirus)	37296	Herpesvirales	Orthoherpesviridae
P26664	Hepatitis C virus genotype 1a (isolate 1) (HCV)	11104	Amarillovirales	Flaviviridae
P03087	Simian virus 40 (SV40)	1891767	Sepolyvirales	Polyomaviridae
P05888	Human immunodeficiency virus type 1 group M subtype B (isolate MN) (HIV-1)	11696	Ortervirales	Retroviridae
O12161	Human immunodeficiency virus type 1 group M subtype C (isolate 92BR025) (HIV-1)	388812	Ortervirales	Retroviridae
P03072	JC polyomavirus (JCPyV) (JCV)	10632	Sepolyvirales	Polyomaviridae
P04325	Human immunodeficiency virus type 1 group M subtype B (isolate PCV12) (HIV-1)	11679	Ortervirales	Retroviridae
P03127	Cottontail rabbit papillomavirus (strain Kansas) (CRPV) (Papillomavirus sylvilagi)	31553	Zurhausenvirales	Papillomaviridae
P68318	Vaccinia virus (strain Copenhagen) (VACV)	10249	Chitovirales	Poxviridae
Q90VU7	Human immunodeficiency virus type 1 (HIV-1)	11676	Ortervirales	Retroviridae
Q9Q2G4	Human immunodeficiency virus type 1 (HIV-1)	11676	Ortervirales	Retroviridae
Q76353	Human immunodeficiency virus type 1 (HIV-1)	11676	Ortervirales	Retroviridae
P36741	Human papillomavirus 45	10593	Zurhausenvirales	Papillomaviridae
P04012	Human papillomavirus 11	10580	Zurhausenvirales	Papillomaviridae
Q9J0X9	Human herpesvirus 1 (HHV-1) (Human herpes simplex virus 1)	10298	Herpesvirales	Orthoherpesviridae
A0MPS7	Human papillomavirus type 16	333760	Zurhausenvirales	Papillomaviridae
Q6JGG5	Human adenovirus A serotype 31 (HAdV-31) (Human adenovirus 31)	10529	Rowavirales	Adenoviridae
Q9DUM3	Human herpesvirus 8 (HHV-8) (Kaposi's sarcoma-associated herpesvirus)	37296	Herpesvirales	Orthoherpesviridae
Q8BDF8	Vaccinia virus (VACV) (Orthopoxvirus vaccinia)	10245	Chitovirales	Poxviridae
Q8V1E7	African swine fever virus (ASFV)	10497	Asfuvirales	Asfarviridae
Q8V2D1	Human cytomegalovirus (HHV-5) (Human herpesvirus 5)	10359	Herpesvirales	Orthoherpesviridae
F5HDE4	Human herpesvirus 8 type P (isolate GK18) (HHV-8) (Kaposi's sarcoma-associated herpesvirus)	868565	Herpesvirales	Orthoherpesviridae
A0A0B5AC19	SFTS phlebovirus (isolate SFTSV/Human/China/HB29/2010) (Severe fever with thrombocytopenia virus)	992212	Hareavirales	Phenuiviridae
P12497	Human immunodeficiency virus type 1 group M subtype B (isolate NY5) (HIV-1)	11698	Ortervirales	Retroviridae
Q05127	Zaire ebolavirus (strain Mayinga-76) (ZEBOV) (Zaire Ebola virus)	128952	Mononegavirales	Filoviridae
Q9DGW5	Gallid herpesvirus 2 (strain Chicken/Md5/ATCC VR-987) (GaHV-2) (Marek's disease herpesvirus type 1)	10389	Herpesvirales	Orthoherpesviridae
P12520	Human immunodeficiency virus type 1 group M subtype B (isolate NY5) (HIV-1)	11698	Ortervirales	Retroviridae
Q5EG65	Hepatitis C virus (isolate Glasgow) (HCV)	329389	Amarillovirales	Flaviviridae
P03418	Human respiratory syncytial virus A (strain A2)	11259	Mononegavirales	Pneumoviridae
P05928	Human immunodeficiency virus type 1 group M subtype B (isolate BRU/LAI) (HIV-1)	11686	Ortervirales	Retroviridae
P26662	Hepatitis C virus genotype 1b (isolate Japanese) (HCV)	11116	Amarillovirales	Flaviviridae
P0C045	Hepatitis C virus genotype 1a (isolate H77) (HCV)	63746	Amarillovirales	Flaviviridae
P0C746	Human T-cell leukemia virus 1 (strain Japan ATK-1 subtype A) (HTLV-1)	11926	Ortervirales	Retroviridae
Q4KRW3	Human respiratory syncytial virus	11250	Mononegavirales	Pneumoviridae
Q91AU0	Hepatitis C virus genotype 1b (HCV)	31647	Amarillovirales	Flaviviridae
O93077	Hepacivirus hominis	3052230	Amarillovirales	Flaviviridae
K4P3M7	Bovine herpesvirus 1 (BoHV-1)	10320	Herpesvirales	Orthoherpesviridae
K7Y1A2	Hepacivirus hominis	3052230	Amarillovirales	Flaviviridae
Q8QVZ0	Hepatitis C virus genotype 1b (HCV)	31647	Amarillovirales	Flaviviridae
W5VXH5	Dabie bandavirus (Severe fever with thrombocytopenia virus) (Huaiyangshan banyangvirus)	1003835	Hareavirales	Phenuiviridae
P21530	Classical swine fever virus (strain Brescia) (CSFV) (Hog cholera virus)	11098	Amarillovirales	Flaviviridae
P17473	Equine herpesvirus 1 (strain Kentucky A) (EHV-1) (Equine abortion virus)	10329	Herpesvirales	Orthoherpesviridae
Q66677	Equine herpesvirus 2 (strain 86/87) (EHV-2)	82831	Herpesvirales	Orthoherpesviridae
Q68871	Classical swine fever virus - Alfort/187	358769	Amarillovirales	Flaviviridae
C5E519	Influenza A virus (A/New York/1682/2009(H1N1))	643960	Articulavirales	Orthomyxoviridae
Q6DPW5	Influenza A virus (strain A/Vietnam/1203/2004 H5N1)	284218	Articulavirales	Orthomyxoviridae
C5E526	Influenza A virus (A/New York/1682/2009(H1N1))	643960	Articulavirales	Orthomyxoviridae
P87662	Equid alphaherpesvirus 1 (Equine herpesvirus 1)	10326	Herpesvirales	Orthoherpesviridae
Q20MH8	Influenza A virus (strain A/Wilson-Smith/1933 H1N1) (Influenza A virus (strain A/WS/1933 H1N1))	381518	Articulavirales	Orthomyxoviridae
Q5EP37	Influenza A virus (strain A/Vietnam/1203/2004 H5N1)	284218	Articulavirales	Orthomyxoviridae
B4URF7	Influenza A virus (A/WSN/1933(H1N1))	382835	Articulavirales	Orthomyxoviridae
U5TQE9	Human herpesvirus 1 (HHV-1) (Human herpes simplex virus 1)	10298	Herpesvirales	Orthoherpesviridae
Q194T2	Influenza A virus (A/WSN/1933(H1N1))	382835	Articulavirales	Orthomyxoviridae
C5E522	Influenza A virus (A/New York/1682/2009(H1N1))	643960	Articulavirales	Orthomyxoviridae
Q5EP28	Influenza A virus (strain A/Vietnam/1203/2004 H5N1)	284218	Articulavirales	Orthomyxoviridae
I6T1Z2	Influenza A virus (strain A/Aichi/2/1968 H3N2)	387139	Articulavirales	Orthomyxoviridae
L8B1Q7	Equid alphaherpesvirus 1 (Equine herpesvirus 1)	10326	Herpesvirales	Orthoherpesviridae
Q4VW77	Bovine herpesvirus 1 (BoHV-1)	10320	Herpesvirales	Orthoherpesviridae
Q67020	Influenza A virus (A/WSN/1933(H1N1))	382835	Articulavirales	Orthomyxoviridae
Q5NTY3	Equid alphaherpesvirus 1 (Equine herpesvirus 1)	10326	Herpesvirales	Orthoherpesviridae
P0C6X5	Human coronavirus NL63 (HCoV-NL63)	277944	Nidovirales	Coronaviridae
P15659	Influenza A virus (strain A/Wilson-Smith/1933 H1N1) (Influenza A virus (strain A/WS/1933 H1N1))	381518	Articulavirales	Orthomyxoviridae
P69479	Rabies virus (strain ERA) (RABV)	11295	Mononegavirales	Rhabdoviridae
Q84291	Human papillomavirus type 6a	37122	Zurhausenvirales	Papillomaviridae
P24837	Human papillomavirus 39	10588	Zurhausenvirales	Papillomaviridae
Q84292	Human papillomavirus type 6a	37122	Zurhausenvirales	Papillomaviridae
A0A2R4KP93	Middle East respiratory syndrome-related coronavirus (MERS-CoV)	1335626	Nidovirales	Coronaviridae
Q77UV9	Human herpesvirus 8 (HHV-8) (Kaposi's sarcoma-associated herpesvirus)	37296	Herpesvirales	Orthoherpesviridae
Q76RH3	Human herpesvirus 8 (HHV-8) (Kaposi's sarcoma-associated herpesvirus)	37296	Herpesvirales	Orthoherpesviridae
Q1HVL8	Human coronavirus 229E (HCoV-229E)	11137	Nidovirales	Coronaviridae
Q1HVL3	Human coronavirus 229E (HCoV-229E)	11137	Nidovirales	Coronaviridae
Q76S40	Human herpesvirus 8 (HHV-8) (Kaposi's sarcoma-associated herpesvirus)	37296	Herpesvirales	Orthoherpesviridae
Q98143	Human herpesvirus 8 (HHV-8) (Kaposi's sarcoma-associated herpesvirus)	37296	Herpesvirales	Orthoherpesviridae
Q1HVK9	Human coronavirus 229E (HCoV-229E)	11137	Nidovirales	Coronaviridae
E5LBS6	Human herpesvirus 8 (HHV-8) (Kaposi's sarcoma-associated herpesvirus)	37296	Herpesvirales	Orthoherpesviridae
E5LBV4	Human herpesvirus 8 (HHV-8) (Kaposi's sarcoma-associated herpesvirus)	37296	Herpesvirales	Orthoherpesviridae
O40931	Human herpesvirus 8 (HHV-8) (Kaposi's sarcoma-associated herpesvirus)	37296	Herpesvirales	Orthoherpesviridae
F5HFL9	Human herpesvirus 8 (HHV-8) (Kaposi's sarcoma-associated herpesvirus)	37296	Herpesvirales	Orthoherpesviridae
Q76TK5	Human herpesvirus 8 (HHV-8) (Kaposi's sarcoma-associated herpesvirus)	37296	Herpesvirales	Orthoherpesviridae
Q98140	Human herpesvirus 8 (HHV-8) (Kaposi's sarcoma-associated herpesvirus)	37296	Herpesvirales	Orthoherpesviridae
P0C6W4	Bat coronavirus HKU5 (BtCoV) (BtCoV/HKU5/2004)	694008	Nidovirales	Coronaviridae
K9N638	Middle East respiratory syndrome-related coronavirus (isolate United Kingdom/H123990006/2012) (MERS-CoV) (Betacoronavirus England 1)	1263720	Nidovirales	Coronaviridae
P0C6T5	Bat coronavirus HKU5 (BtCoV) (BtCoV/HKU5/2004)	694008	Nidovirales	Coronaviridae
P0C6X0	Bovine coronavirus (strain Quebec) (BCoV) (BCV)	11133	Nidovirales	Coronaviridae
P0C6V0	Murine coronavirus (strain A59) (MHV-A59) (Murine hepatitis virus)	11142	Nidovirales	Coronaviridae
Q9IK90	Nipah virus	3052225	Mononegavirales	Paramyxoviridae
P04134	Porcine transmissible gastroenteritis coronavirus (strain Purdue) (TGEV)	11151	Nidovirales	Coronaviridae
P36298	Canine coronavirus (strain Insavc-1) (CCoV) (Canine enteric coronavirus)	36391	Nidovirales	Coronaviridae
A3EXH0	Bat coronavirus HKU9 (BtCoV) (BtCoV/HKU9)	694006	Nidovirales	Coronaviridae
A3EXD7	Bat coronavirus HKU5 (BtCoV) (BtCoV/HKU5/2004)	694008	Nidovirales	Coronaviridae
P24411	Porcine respiratory coronavirus (strain RM4) (PRCoV) (PRCV)	11148	Nidovirales	Coronaviridae
Q3I5I7	Bat coronavirus Rp3/2004 (BtCoV/Rp3/2004) (SARS-like coronavirus Rp3)	349344	Nidovirales	Coronaviridae
U5WI05	Bat SARS-like coronavirus WIV1	1415852	Nidovirales	Coronaviridae
P0DTF1	Severe acute respiratory syndrome coronavirus 2 (2019-nCoV) (SARS-CoV-2)	2697049	Nidovirales	Coronaviridae
R9UQ53	Middle East respiratory syndrome-related coronavirus (MERS-CoV)	1335626	Nidovirales	Coronaviridae
K0BVN3	Human betacoronavirus 2c (isolate EMC/2012) (HCoV-EMC)	1235996	Nidovirales	Coronaviridae
Q19QW5	Severe acute respiratory syndrome coronavirus (SARS-CoV)	694009	Nidovirales	Coronaviridae
J9TC74	Severe acute respiratory syndrome coronavirus (SARS-CoV)	694009	Nidovirales	Coronaviridae
P05780	Influenza A virus (strain A/Wilson-Smith/1933 H1N1) (Influenza A virus (strain A/WS/1933 H1N1))	381518	Articulavirales	Orthomyxoviridae
P57083	Human herpesvirus 1 (strain Patton) (HHV-1) (Human herpes simplex virus 1)	10308	Herpesvirales	Orthoherpesviridae
P0C6W5	Bat coronavirus HKU9 (BtCoV) (BtCoV/HKU9)	694006	Nidovirales	Coronaviridae
P0C6X4	Human coronavirus HKU1 (isolate N5) (HCoV-HKU1)	443241	Nidovirales	Coronaviridae
P15130	Human coronavirus 229E (HCoV-229E)	11137	Nidovirales	Coronaviridae
P30020	Bovine herpesvirus 1.1 (strain P8-2) (BoHV-1) (Infectious bovine rhinotracheitis virus)	10324	Herpesvirales	Orthoherpesviridae
F5HC33	Human cytomegalovirus (strain Merlin) (HHV-5) (Human herpesvirus 5)	295027	Herpesvirales	Orthoherpesviridae
P10527	Bovine coronavirus (strain Mebus) (BCoV) (BCV)	11132	Nidovirales	Coronaviridae
Q809B7	Semliki forest virus (SFV)	11033	Martellivirales	Togaviridae
Q5GDB5	SARS coronavirus PC4-145	296839	Nidovirales	Coronaviridae
Q7TLC7	Severe acute respiratory syndrome coronavirus (SARS-CoV)	694009	Nidovirales	Coronaviridae
P19739	Human coronavirus 229E (HCoV-229E)	11137	Nidovirales	Coronaviridae
Q4JQU3	Varicella-zoster virus (strain Oka vaccine) (HHV-3) (Human herpesvirus 3)	341980	Herpesvirales	Orthoherpesviridae
A3EXD1	Bat coronavirus HKU5 (BtCoV) (BtCoV/HKU5/2004)	694008	Nidovirales	Coronaviridae
Q19QW4	Severe acute respiratory syndrome coronavirus (SARS-CoV)	694009	Nidovirales	Coronaviridae
A0A3G5BIZ0	SARS coronavirus Urbani	228330	Nidovirales	Coronaviridae
Q19QW2	Severe acute respiratory syndrome coronavirus (SARS-CoV)	694009	Nidovirales	Coronaviridae
Q6S8E0	Severe acute respiratory syndrome coronavirus (SARS-CoV)	694009	Nidovirales	Coronaviridae
Q7T6S2	Severe acute respiratory syndrome coronavirus (SARS-CoV)	694009	Nidovirales	Coronaviridae
Q98823	Human herpesvirus 8 (HHV-8) (Kaposi's sarcoma-associated herpesvirus)	37296	Herpesvirales	Orthoherpesviridae
P05777	Influenza A virus (strain A/Wilson-Smith/1933 H1N1) (Influenza A virus (strain A/WS/1933 H1N1))	381518	Articulavirales	Orthomyxoviridae
Q05323	Zaire ebolavirus (strain Mayinga-76) (ZEBOV) (Zaire Ebola virus)	128952	Mononegavirales	Filoviridae
P03470	Influenza A virus (strain A/Wilson-Smith/1933 H1N1) (Influenza A virus (strain A/WS/1933 H1N1))	381518	Articulavirales	Orthomyxoviridae
P03430	Influenza A virus (strain A/Wilson-Smith/1933 H1N1) (Influenza A virus (strain A/WS/1933 H1N1))	381518	Articulavirales	Orthomyxoviridae
A0A024B7W1	Zika virus (isolate ZIKV/Human/French Polynesia/10087PF/2013) (ZIKV)	2043570	Amarillovirales	Flaviviridae
P09992	Lymphocytic choriomeningitis virus (strain Armstrong) (LCMV)	11624	Hareavirales	Arenaviridae
Q6Q1R8	Human coronavirus NL63 (HCoV-NL63)	277944	Nidovirales	Coronaviridae
P15682	Influenza A virus (strain A/Wilson-Smith/1933 H1N1) (Influenza A virus (strain A/WS/1933 H1N1))	381518	Articulavirales	Orthomyxoviridae
P33469	Human coronavirus OC43 (HCoV-OC43)	31631	Nidovirales	Coronaviridae
F5HC79	Human cytomegalovirus (strain Merlin) (HHV-5) (Human herpesvirus 5)	295027	Herpesvirales	Orthoherpesviridae
P17388	Human papillomavirus 31	10585	Zurhausenvirales	Papillomaviridae
Q2HRD4	Human herpesvirus 8 type P (isolate GK18) (HHV-8) (Kaposi's sarcoma-associated herpesvirus)	868565	Herpesvirales	Orthoherpesviridae
Q5MQC6	Human coronavirus HKU1 (isolate N1) (HCoV-HKU1)	443239	Nidovirales	Coronaviridae
P17383	Human papillomavirus 31	10585	Zurhausenvirales	Papillomaviridae
K9N4V0	Middle East respiratory syndrome-related coronavirus (isolate United Kingdom/H123990006/2012) (MERS-CoV) (Betacoronavirus England 1)	1263720	Nidovirales	Coronaviridae
F5HE44	Human cytomegalovirus (strain Merlin) (HHV-5) (Human herpesvirus 5)	295027	Herpesvirales	Orthoherpesviridae
F5HGT1	Human cytomegalovirus (strain Merlin) (HHV-5) (Human herpesvirus 5)	295027	Herpesvirales	Orthoherpesviridae
P06461	Human papillomavirus type 6b	10600	Zurhausenvirales	Papillomaviridae
P06460	Human papillomavirus type 6b	10600	Zurhausenvirales	Papillomaviridae
G3CKS7	Epstein-Barr virus (strain GD1) (HHV-4) (Human gammaherpesvirus 4)	10376	Herpesvirales	Orthoherpesviridae
Q05320	Zaire ebolavirus (strain Mayinga-76) (ZEBOV) (Zaire Ebola virus)	128952	Mononegavirales	Filoviridae
Q05128	Zaire ebolavirus (strain Mayinga-76) (ZEBOV) (Zaire Ebola virus)	128952	Mononegavirales	Filoviridae
Q32ZE1	Zika virus (ZIKV)	64320	Amarillovirales	Flaviviridae
P03315	Semliki forest virus (SFV)	11033	Martellivirales	Togaviridae
P90495	Human herpesvirus 8 type P (isolate GK18) (HHV-8) (Kaposi's sarcoma-associated herpesvirus)	868565	Herpesvirales	Orthoherpesviridae
F5HGP1	Human cytomegalovirus (strain Merlin) (HHV-5) (Human herpesvirus 5)	295027	Herpesvirales	Orthoherpesviridae
F5HAC7	Human cytomegalovirus (strain Merlin) (HHV-5) (Human herpesvirus 5)	295027	Herpesvirales	Orthoherpesviridae
F5HE74	Human cytomegalovirus (strain Merlin) (HHV-5) (Human herpesvirus 5)	295027	Herpesvirales	Orthoherpesviridae
F5HGU6	Human cytomegalovirus (strain Merlin) (HHV-5) (Human herpesvirus 5)	295027	Herpesvirales	Orthoherpesviridae
Q6SW92	Human cytomegalovirus (strain Merlin) (HHV-5) (Human herpesvirus 5)	295027	Herpesvirales	Orthoherpesviridae
F5HG68	Human cytomegalovirus (strain Merlin) (HHV-5) (Human herpesvirus 5)	295027	Herpesvirales	Orthoherpesviridae
B4URF0	Influenza A virus (A/WSN/1933(H1N1))	382835	Articulavirales	Orthomyxoviridae
A0A218M2D5	Lymphocytic choriomeningitis virus (strain Armstrong) (LCMV)	11624	Hareavirales	Arenaviridae
F5HB41	Human cytomegalovirus (strain Merlin) (HHV-5) (Human herpesvirus 5)	295027	Herpesvirales	Orthoherpesviridae
F5HDE7	Human cytomegalovirus (strain Merlin) (HHV-5) (Human herpesvirus 5)	295027	Herpesvirales	Orthoherpesviridae
F5H991	Human cytomegalovirus (strain Merlin) (HHV-5) (Human herpesvirus 5)	295027	Herpesvirales	Orthoherpesviridae
B8ZX42	Merkel cell polyomavirus	493803	Sepolyvirales	Polyomaviridae
O92597	Human herpesvirus 8 (HHV-8) (Kaposi's sarcoma-associated herpesvirus)	37296	Herpesvirales	Orthoherpesviridae
P88925	Human herpesvirus 8 type M	435895	Herpesvirales	Orthoherpesviridae
Q69117	Epstein-Barr virus (strain GD1) (HHV-4) (Human gammaherpesvirus 4)	10376	Herpesvirales	Orthoherpesviridae
P08363	Bluetongue virus 10 (isolate USA) (BTV 10)	10900	Reovirales	Sedoreoviridae
Q6SW98	Human cytomegalovirus (strain Merlin) (HHV-5) (Human herpesvirus 5)	295027	Herpesvirales	Orthoherpesviridae
Q6SWB9	Human cytomegalovirus (strain Merlin) (HHV-5) (Human herpesvirus 5)	295027	Herpesvirales	Orthoherpesviridae
F5HCP3	Human cytomegalovirus (strain Merlin) (HHV-5) (Human herpesvirus 5)	295027	Herpesvirales	Orthoherpesviridae
Q6SW43	Human cytomegalovirus (strain Merlin) (HHV-5) (Human herpesvirus 5)	295027	Herpesvirales	Orthoherpesviridae
F5HEA3	Human cytomegalovirus (strain Merlin) (HHV-5) (Human herpesvirus 5)	295027	Herpesvirales	Orthoherpesviridae
Q6SW99	Human cytomegalovirus (strain Merlin) (HHV-5) (Human herpesvirus 5)	295027	Herpesvirales	Orthoherpesviridae
F5HDK1	Human cytomegalovirus (strain Merlin) (HHV-5) (Human herpesvirus 5)	295027	Herpesvirales	Orthoherpesviridae
F5H9T4	Human cytomegalovirus (strain Merlin) (HHV-5) (Human herpesvirus 5)	295027	Herpesvirales	Orthoherpesviridae
F5HC16	Human cytomegalovirus (strain Merlin) (HHV-5) (Human herpesvirus 5)	295027	Herpesvirales	Orthoherpesviridae
F5HDD3	Human cytomegalovirus (strain Merlin) (HHV-5) (Human herpesvirus 5)	295027	Herpesvirales	Orthoherpesviridae
P0CK50	Epstein-Barr virus (strain AG876) (HHV-4) (Human herpesvirus 4)	82830	Herpesvirales	Orthoherpesviridae
Q6SWC4	Human cytomegalovirus (strain Merlin) (HHV-5) (Human herpesvirus 5)	295027	Herpesvirales	Orthoherpesviridae
F5HA06	Human cytomegalovirus (strain Merlin) (HHV-5) (Human herpesvirus 5)	295027	Herpesvirales	Orthoherpesviridae
F5HAY6	Human cytomegalovirus (strain Merlin) (HHV-5) (Human herpesvirus 5)	295027	Herpesvirales	Orthoherpesviridae
Q76RI2	Human herpesvirus 8 (HHV-8) (Kaposi's sarcoma-associated herpesvirus)	37296	Herpesvirales	Orthoherpesviridae
B8ZX49	Merkel cell polyomavirus	493803	Sepolyvirales	Polyomaviridae
Q77Q82	Human herpesvirus 8 (HHV-8) (Kaposi's sarcoma-associated herpesvirus)	37296	Herpesvirales	Orthoherpesviridae
V9LLU8	Human cytomegalovirus (strain Merlin) (HHV-5) (Human herpesvirus 5)	295027	Herpesvirales	Orthoherpesviridae
H9EJ66	Human coronavirus NL63 (HCoV-NL63)	277944	Nidovirales	Coronaviridae
P29990	Dengue virus type 2 (strain Thailand/16681/1984) (DENV-2)	31634	Amarillovirales	Flaviviridae
P03454	Influenza A virus (strain A/Wilson-Smith/1933 H1N1) (Influenza A virus (strain A/WS/1933 H1N1))	381518	Articulavirales	Orthomyxoviridae
Q82506	Influenza A virus (strain A/Wilson-Smith/1933 H1N1) (Influenza A virus (strain A/WS/1933 H1N1))	381518	Articulavirales	Orthomyxoviridae
Q6SW59	Human cytomegalovirus (strain Merlin) (HHV-5) (Human herpesvirus 5)	295027	Herpesvirales	Orthoherpesviridae
Q6SW70	Human cytomegalovirus (strain Merlin) (HHV-5) (Human herpesvirus 5)	295027	Herpesvirales	Orthoherpesviridae
P17389	Human papillomavirus 31	10585	Zurhausenvirales	Papillomaviridae
Q6SW73	Human cytomegalovirus (strain Merlin) (HHV-5) (Human herpesvirus 5)	295027	Herpesvirales	Orthoherpesviridae
F5HAR3	Human cytomegalovirus (strain Merlin) (HHV-5) (Human herpesvirus 5)	295027	Herpesvirales	Orthoherpesviridae
Q6SWB7	Human cytomegalovirus (strain Merlin) (HHV-5) (Human herpesvirus 5)	295027	Herpesvirales	Orthoherpesviridae
F5H9Z4	Human cytomegalovirus (strain Merlin) (HHV-5) (Human herpesvirus 5)	295027	Herpesvirales	Orthoherpesviridae
F5HDC7	Human cytomegalovirus (strain Merlin) (HHV-5) (Human herpesvirus 5)	295027	Herpesvirales	Orthoherpesviridae
F5H9I4	Human cytomegalovirus (strain Merlin) (HHV-5) (Human herpesvirus 5)	295027	Herpesvirales	Orthoherpesviridae
Q6SWD3	Human cytomegalovirus (strain Merlin) (HHV-5) (Human herpesvirus 5)	295027	Herpesvirales	Orthoherpesviridae
F5HE69	Human cytomegalovirus (strain Merlin) (HHV-5) (Human herpesvirus 5)	295027	Herpesvirales	Orthoherpesviridae
F7V998	Human cytomegalovirus (strain Merlin) (HHV-5) (Human herpesvirus 5)	295027	Herpesvirales	Orthoherpesviridae
P88926	Human herpesvirus 8 type M	435895	Herpesvirales	Orthoherpesviridae
V9LLT8	Human cytomegalovirus (strain Merlin) (HHV-5) (Human herpesvirus 5)	295027	Herpesvirales	Orthoherpesviridae
A2ICZ0	Human coronavirus 229E (HCoV-229E)	11137	Nidovirales	Coronaviridae
A0A6B9W2G5	Severe acute respiratory syndrome coronavirus 2 (2019-nCoV) (SARS-CoV-2)	2697049	Nidovirales	Coronaviridae
O36551	Human herpesvirus 8 (HHV-8) (Kaposi's sarcoma-associated herpesvirus)	37296	Herpesvirales	Orthoherpesviridae
Q05322	Zaire ebolavirus (strain Mayinga-76) (ZEBOV) (Zaire Ebola virus)	128952	Mononegavirales	Filoviridae
P0C6X2	Human coronavirus HKU1 (isolate N1) (HCoV-HKU1)	443239	Nidovirales	Coronaviridae
P0C6X6	Human coronavirus OC43 (HCoV-OC43)	31631	Nidovirales	Coronaviridae
F5HI87	Human cytomegalovirus (strain Merlin) (HHV-5) (Human herpesvirus 5)	295027	Herpesvirales	Orthoherpesviridae
Q6SW81	Human cytomegalovirus (strain Merlin) (HHV-5) (Human herpesvirus 5)	295027	Herpesvirales	Orthoherpesviridae
Q98146	Human herpesvirus 8 type P (isolate GK18) (HHV-8) (Kaposi's sarcoma-associated herpesvirus)	868565	Herpesvirales	Orthoherpesviridae
F5HG98	Human cytomegalovirus (strain Merlin) (HHV-5) (Human herpesvirus 5)	295027	Herpesvirales	Orthoherpesviridae
F5HB52	Human cytomegalovirus (strain Merlin) (HHV-5) (Human herpesvirus 5)	295027	Herpesvirales	Orthoherpesviridae
F5HGG3	Human cytomegalovirus (strain Merlin) (HHV-5) (Human herpesvirus 5)	295027	Herpesvirales	Orthoherpesviridae
Q6SW85	Human cytomegalovirus (strain Merlin) (HHV-5) (Human herpesvirus 5)	295027	Herpesvirales	Orthoherpesviridae
O92835	Dengue virus type 2 (DENV-2)	11060	Amarillovirales	Flaviviridae
K9N7D2	Middle East respiratory syndrome-related coronavirus (isolate United Kingdom/H123990006/2012) (MERS-CoV) (Betacoronavirus England 1)	1263720	Nidovirales	Coronaviridae
F5H8R0	Human cytomegalovirus (strain Merlin) (HHV-5) (Human herpesvirus 5)	295027	Herpesvirales	Orthoherpesviridae
Q6SWC0	Human cytomegalovirus (strain Merlin) (HHV-5) (Human herpesvirus 5)	295027	Herpesvirales	Orthoherpesviridae
F5HA10	Human cytomegalovirus (strain Merlin) (HHV-5) (Human herpesvirus 5)	295027	Herpesvirales	Orthoherpesviridae
Q6SW10	Human cytomegalovirus (strain Merlin) (HHV-5) (Human herpesvirus 5)	295027	Herpesvirales	Orthoherpesviridae
Q778F3	Kappapapillomavirus 2	10623	Zurhausenvirales	Papillomaviridae
P17385	Human papillomavirus 31	10585	Zurhausenvirales	Papillomaviridae
P88970	Human herpesvirus 8 (HHV-8) (Kaposi's sarcoma-associated herpesvirus)	37296	Herpesvirales	Orthoherpesviridae
Q76RH5	Human herpesvirus 8 (HHV-8) (Kaposi's sarcoma-associated herpesvirus)	37296	Herpesvirales	Orthoherpesviridae
P26672	Vaccinia virus (strain Western Reserve) (VACV) (Vaccinia virus (strain WR))	10254	Chitovirales	Poxviridae
Q1HVJ0	Epstein-Barr virus (strain AG876) (HHV-4) (Human herpesvirus 4)	82830	Herpesvirales	Orthoherpesviridae
F5HHQ0	Human cytomegalovirus (strain Merlin) (HHV-5) (Human herpesvirus 5)	295027	Herpesvirales	Orthoherpesviridae
F5HEN8	Human cytomegalovirus (strain Merlin) (HHV-5) (Human herpesvirus 5)	295027	Herpesvirales	Orthoherpesviridae
F5HG51	Human cytomegalovirus (strain Merlin) (HHV-5) (Human herpesvirus 5)	295027	Herpesvirales	Orthoherpesviridae
Q20MH0	Influenza A virus (strain A/Wilson-Smith/1933 H1N1) (Influenza A virus (strain A/WS/1933 H1N1))	381518	Articulavirales	Orthomyxoviridae
F5HDM3	Human cytomegalovirus (strain Merlin) (HHV-5) (Human herpesvirus 5)	295027	Herpesvirales	Orthoherpesviridae
F5HIG1	Human cytomegalovirus (strain Merlin) (HHV-5) (Human herpesvirus 5)	295027	Herpesvirales	Orthoherpesviridae
F5HF90	Human cytomegalovirus (strain Merlin) (HHV-5) (Human herpesvirus 5)	295027	Herpesvirales	Orthoherpesviridae
Q89733	Influenza A virus (strain A/Wilson-Smith/1933 H1N1) (Influenza A virus (strain A/WS/1933 H1N1))	381518	Articulavirales	Orthomyxoviridae
F5HD27	Human cytomegalovirus (strain Merlin) (HHV-5) (Human herpesvirus 5)	295027	Herpesvirales	Orthoherpesviridae
Q6S8E1	Severe acute respiratory syndrome coronavirus (SARS-CoV)	694009	Nidovirales	Coronaviridae
Q6SWC7	Human cytomegalovirus (strain Merlin) (HHV-5) (Human herpesvirus 5)	295027	Herpesvirales	Orthoherpesviridae
F5HAM4	Human cytomegalovirus (strain Merlin) (HHV-5) (Human herpesvirus 5)	295027	Herpesvirales	Orthoherpesviridae
F5HI68	Human cytomegalovirus (strain Merlin) (HHV-5) (Human herpesvirus 5)	295027	Herpesvirales	Orthoherpesviridae
F5HGC2	Human cytomegalovirus (strain Merlin) (HHV-5) (Human herpesvirus 5)	295027	Herpesvirales	Orthoherpesviridae
Q2HRC9	Human herpesvirus 8 type P (isolate GK18) (HHV-8) (Kaposi's sarcoma-associated herpesvirus)	868565	Herpesvirales	Orthoherpesviridae
P88947	Human herpesvirus 8 type M	435895	Herpesvirales	Orthoherpesviridae
Q3KSR4	Epstein-Barr virus (strain GD1) (HHV-4) (Human gammaherpesvirus 4)	10376	Herpesvirales	Orthoherpesviridae
P88935	Human herpesvirus 8 type M	435895	Herpesvirales	Orthoherpesviridae
P03243	Human adenovirus C serotype 5 (HAdV-5) (Human adenovirus 5)	28285	Rowavirales	Adenoviridae
P17763	Dengue virus type 1 (strain Nauru/West Pac/1974) (DENV-1)	11059	Amarillovirales	Flaviviridae
P18272	Zaire ebolavirus (strain Mayinga-76) (ZEBOV) (Zaire Ebola virus)	128952	Mononegavirales	Filoviridae
P17382	Human papillomavirus 31	10585	Zurhausenvirales	Papillomaviridae
P18092	Human immunodeficiency virus type 2 subtype A (isolate BEN) (HIV-2)	11714	Ortervirales	Retroviridae
F5HF49	Human cytomegalovirus (strain Merlin) (HHV-5) (Human herpesvirus 5)	295027	Herpesvirales	Orthoherpesviridae
F5HF62	Human cytomegalovirus (strain Merlin) (HHV-5) (Human herpesvirus 5)	295027	Herpesvirales	Orthoherpesviridae
Q6SWD5	Human cytomegalovirus (strain Merlin) (HHV-5) (Human herpesvirus 5)	295027	Herpesvirales	Orthoherpesviridae
F5HFJ7	Human cytomegalovirus (strain Merlin) (HHV-5) (Human herpesvirus 5)	295027	Herpesvirales	Orthoherpesviridae
Q6SWA3	Human cytomegalovirus (strain Merlin) (HHV-5) (Human herpesvirus 5)	295027	Herpesvirales	Orthoherpesviridae
F5HCJ2	Human herpesvirus 8 type P (isolate GK18) (HHV-8) (Kaposi's sarcoma-associated herpesvirus)	868565	Herpesvirales	Orthoherpesviridae
F5HA93	Human cytomegalovirus (strain Merlin) (HHV-5) (Human herpesvirus 5)	295027	Herpesvirales	Orthoherpesviridae
F5HDQ6	Human cytomegalovirus (strain Merlin) (HHV-5) (Human herpesvirus 5)	295027	Herpesvirales	Orthoherpesviridae
Q6SWD1	Human cytomegalovirus (strain Merlin) (HHV-5) (Human herpesvirus 5)	295027	Herpesvirales	Orthoherpesviridae
Q6SWA0	Human cytomegalovirus (strain Merlin) (HHV-5) (Human herpesvirus 5)	295027	Herpesvirales	Orthoherpesviridae
F5HFH0	Human cytomegalovirus (strain Merlin) (HHV-5) (Human herpesvirus 5)	295027	Herpesvirales	Orthoherpesviridae
F7V999	Human cytomegalovirus (strain Merlin) (HHV-5) (Human herpesvirus 5)	295027	Herpesvirales	Orthoherpesviridae
F5HCK7	Human cytomegalovirus (strain Merlin) (HHV-5) (Human herpesvirus 5)	295027	Herpesvirales	Orthoherpesviridae
F5HHT6	Human cytomegalovirus (strain Merlin) (HHV-5) (Human herpesvirus 5)	295027	Herpesvirales	Orthoherpesviridae
P88933	Human herpesvirus 8 type M	435895	Herpesvirales	Orthoherpesviridae
P0C788	Human herpesvirus 8 type P (isolate GK18) (HHV-8) (Kaposi's sarcoma-associated herpesvirus)	868565	Herpesvirales	Orthoherpesviridae
F5HFA1	Human herpesvirus 8 type P (isolate GK18) (HHV-8) (Kaposi's sarcoma-associated herpesvirus)	868565	Herpesvirales	Orthoherpesviridae
F5HIN9	Human cytomegalovirus (strain Merlin) (HHV-5) (Human herpesvirus 5)	295027	Herpesvirales	Orthoherpesviridae
F5HFA5	Human cytomegalovirus (strain Merlin) (HHV-5) (Human herpesvirus 5)	295027	Herpesvirales	Orthoherpesviridae
F5HFB4	Human cytomegalovirus (strain Merlin) (HHV-5) (Human herpesvirus 5)	295027	Herpesvirales	Orthoherpesviridae
F5H9N4	Human cytomegalovirus (strain Merlin) (HHV-5) (Human herpesvirus 5)	295027	Herpesvirales	Orthoherpesviridae
Q6SW89	Human cytomegalovirus (strain Merlin) (HHV-5) (Human herpesvirus 5)	295027	Herpesvirales	Orthoherpesviridae
Q6SWB8	Human cytomegalovirus (strain Merlin) (HHV-5) (Human herpesvirus 5)	295027	Herpesvirales	Orthoherpesviridae
Q6SWC8	Human cytomegalovirus (strain Merlin) (HHV-5) (Human herpesvirus 5)	295027	Herpesvirales	Orthoherpesviridae
F5HD92	Human cytomegalovirus (strain Merlin) (HHV-5) (Human herpesvirus 5)	295027	Herpesvirales	Orthoherpesviridae
Q2HRC6	Human herpesvirus 8 type P (isolate GK18) (HHV-8) (Kaposi's sarcoma-associated herpesvirus)	868565	Herpesvirales	Orthoherpesviridae
Q6SVZ0	Human cytomegalovirus (strain Merlin) (HHV-5) (Human herpesvirus 5)	295027	Herpesvirales	Orthoherpesviridae
B4URE7	Influenza A virus (A/WSN/1933(H1N1))	382835	Articulavirales	Orthomyxoviridae
Q6SW03	Human cytomegalovirus (strain Merlin) (HHV-5) (Human herpesvirus 5)	295027	Herpesvirales	Orthoherpesviridae
F7V995	Human cytomegalovirus (strain Merlin) (HHV-5) (Human herpesvirus 5)	295027	Herpesvirales	Orthoherpesviridae
B4URF6	Influenza A virus (A/WSN/1933(H1N1))	382835	Articulavirales	Orthomyxoviridae
P88959	Human herpesvirus 8 type M	435895	Herpesvirales	Orthoherpesviridae
Q77UV1	Human herpesvirus 8 (HHV-8) (Kaposi's sarcoma-associated herpesvirus)	37296	Herpesvirales	Orthoherpesviridae
P88937	Human herpesvirus 8 type M	435895	Herpesvirales	Orthoherpesviridae
Q76RI8	Human herpesvirus 8 (HHV-8) (Kaposi's sarcoma-associated herpesvirus)	37296	Herpesvirales	Orthoherpesviridae
P03244	Human adenovirus C serotype 2 (HAdV-2) (Human adenovirus 2)	10515	Rowavirales	Adenoviridae
Q6RJQ3	Human cytomegalovirus (strain Merlin) (HHV-5) (Human herpesvirus 5)	295027	Herpesvirales	Orthoherpesviridae
Q9IK91	Nipah virus	3052225	Mononegavirales	Paramyxoviridae
P0C6X1	Human coronavirus 229E (HCoV-229E)	11137	Nidovirales	Coronaviridae
P03261	Human adenovirus C serotype 2 (HAdV-2) (Human adenovirus 2)	10515	Rowavirales	Adenoviridae
Q6SW94	Human cytomegalovirus (strain Merlin) (HHV-5) (Human herpesvirus 5)	295027	Herpesvirales	Orthoherpesviridae
F5HET4	Human cytomegalovirus (strain Merlin) (HHV-5) (Human herpesvirus 5)	295027	Herpesvirales	Orthoherpesviridae
F5HGJ4	Human cytomegalovirus (strain Merlin) (HHV-5) (Human herpesvirus 5)	295027	Herpesvirales	Orthoherpesviridae
P03238	Human adenovirus C serotype 2 (HAdV-2) (Human adenovirus 2)	10515	Rowavirales	Adenoviridae
Q6SW65	Human cytomegalovirus (strain Merlin) (HHV-5) (Human herpesvirus 5)	295027	Herpesvirales	Orthoherpesviridae
Q6SWC6	Human cytomegalovirus (strain Merlin) (HHV-5) (Human herpesvirus 5)	295027	Herpesvirales	Orthoherpesviridae
Q2HRC8	Human herpesvirus 8 type P (isolate GK18) (HHV-8) (Kaposi's sarcoma-associated herpesvirus)	868565	Herpesvirales	Orthoherpesviridae
F5H9N9	Human cytomegalovirus (strain Merlin) (HHV-5) (Human herpesvirus 5)	295027	Herpesvirales	Orthoherpesviridae
Q77M24	Measles virus (strain Edmonston-Zagreb vaccine) (MeV) (Subacute sclerose panencephalitis virus)	70149	Mononegavirales	Paramyxoviridae
Q49PX0	Vaccinia virus (strain LC16m0) (VACV)	10246	Chitovirales	Poxviridae
A0A7D6XV13	Human adenovirus C serotype 1 (HAdV-1) (Human adenovirus 1)	10533	Rowavirales	Adenoviridae
Q76RI6	Human herpesvirus 8 (HHV-8) (Kaposi's sarcoma-associated herpesvirus)	37296	Herpesvirales	Orthoherpesviridae
Q64866	Human adenovirus F serotype 40 (HAdV-40) (Human adenovirus 40)	28284	Rowavirales	Adenoviridae
Q4VCP9	Nipah virus	3052225	Mononegavirales	Paramyxoviridae
Q9ICL1	Kappapapillomavirus 2	10623	Zurhausenvirales	Papillomaviridae
Q6SW67	Human cytomegalovirus (strain Merlin) (HHV-5) (Human herpesvirus 5)	295027	Herpesvirales	Orthoherpesviridae
F5HFZ4	Human cytomegalovirus (strain Merlin) (HHV-5) (Human herpesvirus 5)	295027	Herpesvirales	Orthoherpesviridae
V9LLX6	Human cytomegalovirus (strain Merlin) (HHV-5) (Human herpesvirus 5)	295027	Herpesvirales	Orthoherpesviridae
Q6SWC3	Human cytomegalovirus (strain Merlin) (HHV-5) (Human herpesvirus 5)	295027	Herpesvirales	Orthoherpesviridae
Q6SW77	Human cytomegalovirus (strain Merlin) (HHV-5) (Human herpesvirus 5)	295027	Herpesvirales	Orthoherpesviridae
F5HAD1	Human herpesvirus 8 type P (isolate GK18) (HHV-8) (Kaposi's sarcoma-associated herpesvirus)	868565	Herpesvirales	Orthoherpesviridae
F5HAZ3	Human cytomegalovirus (strain Merlin) (HHV-5) (Human herpesvirus 5)	295027	Herpesvirales	Orthoherpesviridae
F5HFG3	Human cytomegalovirus (strain Merlin) (HHV-5) (Human herpesvirus 5)	295027	Herpesvirales	Orthoherpesviridae
Q1HVG0	Epstein-Barr virus (strain AG876) (HHV-4) (Human herpesvirus 4)	82830	Herpesvirales	Orthoherpesviridae
Q6SW34	Human cytomegalovirus (strain Merlin) (HHV-5) (Human herpesvirus 5)	295027	Herpesvirales	Orthoherpesviridae
P88911	Human herpesvirus 8 type M	435895	Herpesvirales	Orthoherpesviridae
F5H8S6	Human cytomegalovirus (strain Merlin) (HHV-5) (Human herpesvirus 5)	295027	Herpesvirales	Orthoherpesviridae
F5HAK6	Human cytomegalovirus (strain Merlin) (HHV-5) (Human herpesvirus 5)	295027	Herpesvirales	Orthoherpesviridae
F5HFJ8	Human cytomegalovirus (strain Merlin) (HHV-5) (Human herpesvirus 5)	295027	Herpesvirales	Orthoherpesviridae
F5HH39	Human cytomegalovirus (strain Merlin) (HHV-5) (Human herpesvirus 5)	295027	Herpesvirales	Orthoherpesviridae
Q6SW05	Human cytomegalovirus (strain Merlin) (HHV-5) (Human herpesvirus 5)	295027	Herpesvirales	Orthoherpesviridae
Q9DUM9	Human herpesvirus 8 (HHV-8) (Kaposi's sarcoma-associated herpesvirus)	37296	Herpesvirales	Orthoherpesviridae
I1YP38	Epstein-Barr virus (strain GD1) (HHV-4) (Human gammaherpesvirus 4)	10376	Herpesvirales	Orthoherpesviridae
U3KRG9	Human cytomegalovirus (strain Merlin) (HHV-5) (Human herpesvirus 5)	295027	Herpesvirales	Orthoherpesviridae
D0UZS3	Human herpesvirus 8 (HHV-8) (Kaposi's sarcoma-associated herpesvirus)	37296	Herpesvirales	Orthoherpesviridae
Q6SW62	Human cytomegalovirus (strain Merlin) (HHV-5) (Human herpesvirus 5)	295027	Herpesvirales	Orthoherpesviridae
Q98157	Human herpesvirus 8 type P (isolate GK18) (HHV-8) (Kaposi's sarcoma-associated herpesvirus)	868565	Herpesvirales	Orthoherpesviridae
Q01220	Vaccinia virus (strain Western Reserve) (VACV) (Vaccinia virus (strain WR))	10254	Chitovirales	Poxviridae
Q2HRC7	Human herpesvirus 8 type P (isolate GK18) (HHV-8) (Kaposi's sarcoma-associated herpesvirus)	868565	Herpesvirales	Orthoherpesviridae
F5HET1	Human cytomegalovirus (strain Merlin) (HHV-5) (Human herpesvirus 5)	295027	Herpesvirales	Orthoherpesviridae
Q6SW00	Human cytomegalovirus (strain Merlin) (HHV-5) (Human herpesvirus 5)	295027	Herpesvirales	Orthoherpesviridae
Q77PA8	Myxoma virus (strain Lausanne) (MYXV)	31530	Chitovirales	Poxviridae
P90463	Human herpesvirus 8 type P (isolate GK18) (HHV-8) (Kaposi's sarcoma-associated herpesvirus)	868565	Herpesvirales	Orthoherpesviridae
F5HBR4	Human cytomegalovirus (strain Merlin) (HHV-5) (Human herpesvirus 5)	295027	Herpesvirales	Orthoherpesviridae
Q9J5G4	Fowlpox virus (strain NVSL) (FPV)	928301	Chitovirales	Poxviridae
F5H9F9	Human cytomegalovirus (strain Merlin) (HHV-5) (Human herpesvirus 5)	295027	Herpesvirales	Orthoherpesviridae
F5HI32	Human cytomegalovirus (strain Merlin) (HHV-5) (Human herpesvirus 5)	295027	Herpesvirales	Orthoherpesviridae
Q6SW79	Human cytomegalovirus (strain Merlin) (HHV-5) (Human herpesvirus 5)	295027	Herpesvirales	Orthoherpesviridae
F5HD03	Human cytomegalovirus (strain Merlin) (HHV-5) (Human herpesvirus 5)	295027	Herpesvirales	Orthoherpesviridae
Q2HR85	Human herpesvirus 8 type P (isolate GK18) (HHV-8) (Kaposi's sarcoma-associated herpesvirus)	868565	Herpesvirales	Orthoherpesviridae
F5HHL7	Human cytomegalovirus (strain Merlin) (HHV-5) (Human herpesvirus 5)	295027	Herpesvirales	Orthoherpesviridae
Q98136	Human herpesvirus 8 (HHV-8) (Kaposi's sarcoma-associated herpesvirus)	37296	Herpesvirales	Orthoherpesviridae
Q98138	Human herpesvirus 8 (HHV-8) (Kaposi's sarcoma-associated herpesvirus)	37296	Herpesvirales	Orthoherpesviridae
P88950	Human herpesvirus 8 type M	435895	Herpesvirales	Orthoherpesviridae
P88940	Human herpesvirus 8 type M	435895	Herpesvirales	Orthoherpesviridae
P03265	Human adenovirus C serotype 5 (HAdV-5) (Human adenovirus 5)	28285	Rowavirales	Adenoviridae
P09866	Dengue virus type 4 (strain Dominica/814669/1981) (DENV-4)	408871	Amarillovirales	Flaviviridae
P04499	Human adenovirus C serotype 5 (HAdV-5) (Human adenovirus 5)	28285	Rowavirales	Adenoviridae
P03264	Human adenovirus C serotype 2 (HAdV-2) (Human adenovirus 2)	10515	Rowavirales	Adenoviridae
P28939	Equine herpesvirus 1 (strain Ab4p) (EHV-1) (Equine abortion virus)	31520	Herpesvirales	Orthoherpesviridae
D0EPS2	Dengue virus type 3 (DENV-3)	11069	Amarillovirales	Flaviviridae
Q8B105	Dengue virus type 1 (DENV-1)	11053	Amarillovirales	Flaviviridae
Q8JPR0	Bunyavirus La Crosse (isolate Human/United States/L78/1978)	796210	Elliovirales	Peribunyaviridae
P88952	Human herpesvirus 8 type M	435895	Herpesvirales	Orthoherpesviridae
F5HF36	Human herpesvirus 8 type P (isolate GK18) (HHV-8) (Kaposi's sarcoma-associated herpesvirus)	868565	Herpesvirales	Orthoherpesviridae
F5HHT4	Human cytomegalovirus (strain Merlin) (HHV-5) (Human herpesvirus 5)	295027	Herpesvirales	Orthoherpesviridae
F7V996	Human cytomegalovirus (strain Merlin) (HHV-5) (Human herpesvirus 5)	295027	Herpesvirales	Orthoherpesviridae
F5HGH8	Human cytomegalovirus (strain Merlin) (HHV-5) (Human herpesvirus 5)	295027	Herpesvirales	Orthoherpesviridae
Q6SW82	Human cytomegalovirus (strain Merlin) (HHV-5) (Human herpesvirus 5)	295027	Herpesvirales	Orthoherpesviridae
A0A1V0G0G8	Orthonairovirus haemorrhagiae	3052518	Hareavirales	Nairoviridae
Q76SB1	Human herpesvirus 8 type M	435895	Herpesvirales	Orthoherpesviridae
C7E599	Human herpesvirus 8 (HHV-8) (Kaposi's sarcoma-associated herpesvirus)	37296	Herpesvirales	Orthoherpesviridae
P88931	Human herpesvirus 8 type M	435895	Herpesvirales	Orthoherpesviridae
P88930	Human herpesvirus 8 type M	435895	Herpesvirales	Orthoherpesviridae
Q76RF5	Human herpesvirus 8 (HHV-8) (Kaposi's sarcoma-associated herpesvirus)	37296	Herpesvirales	Orthoherpesviridae
P68951	Human adenovirus C serotype 5 (HAdV-5) (Human adenovirus 5)	28285	Rowavirales	Adenoviridae
O73557	Lassa virus (strain Mouse/Sierra Leone/Josiah/1976) (LASV)	11622	Hareavirales	Arenaviridae
P03077	Murine polyomavirus (strain A2) (MPyV)	10636	Sepolyvirales	Polyomaviridae
P24938	Human adenovirus C serotype 5 (HAdV-5) (Human adenovirus 5)	28285	Rowavirales	Adenoviridae
P69354	Measles virus (strain Edmonston B) (MeV) (Subacute sclerose panencephalitis virus)	70146	Mononegavirales	Paramyxoviridae
Q88939	Walleye dermal sarcoma virus (WDSV)	39720	Ortervirales	Retroviridae
A8C8W5	Influenza A virus (strain A/Swine/Wisconsin/1/1967 H1N1)	382855	Articulavirales	Orthomyxoviridae
P03083	JC polyomavirus (JCPyV) (JCV)	10632	Sepolyvirales	Polyomaviridae
Q83730	Myxoma virus (strain Lausanne) (MYXV)	31530	Chitovirales	Poxviridae
Q6SW48	Human cytomegalovirus (strain Merlin) (HHV-5) (Human herpesvirus 5)	295027	Herpesvirales	Orthoherpesviridae
F5HGI9	Human cytomegalovirus (strain Merlin) (HHV-5) (Human herpesvirus 5)	295027	Herpesvirales	Orthoherpesviridae
P04489	Human adenovirus C serotype 5 (HAdV-5) (Human adenovirus 5)	28285	Rowavirales	Adenoviridae
F5HHS3	Human cytomegalovirus (strain Merlin) (HHV-5) (Human herpesvirus 5)	295027	Herpesvirales	Orthoherpesviridae
A4ZNR3	Influenza A virus (A/lvPR8/34(H1N1))	437606	Articulavirales	Orthomyxoviridae
F5HG95	Human cytomegalovirus (strain Merlin) (HHV-5) (Human herpesvirus 5)	295027	Herpesvirales	Orthoherpesviridae
Q6TVI8	Orf virus (strain Goat/Texas/SA00/2000) (OV-SA00) (Orf virus-San Angelo 2000)	647330	Chitovirales	Poxviridae
Q0A2M3	Influenza A virus (A/chicken/Rostock/45/1934(H7N1))	402524	Articulavirales	Orthomyxoviridae
P88912	Human herpesvirus 8 type M	435895	Herpesvirales	Orthoherpesviridae
Q77IQ3	Simian virus 40 (SV40)	1891767	Sepolyvirales	Polyomaviridae
Q6TPE1	SARS coronavirus GZ02	256753	Nidovirales	Coronaviridae
P03073	Murine polyomavirus (strain A2) (MPyV)	10636	Sepolyvirales	Polyomaviridae
P11223	Avian infectious bronchitis virus (strain Beaudette) (IBV)	11122	Nidovirales	Coronaviridae
P31621	Sheep pulmonary adenomatosis virus (Jaagsiekte sheep retrovirus) (JSRV)	11746	Ortervirales	Retroviridae
Q4U0X7	Human T-cell leukemia virus 3 (strain Pyl43) (HTLV-3)	406769	Ortervirales	Retroviridae
Q2HRA1	Human herpesvirus 8 type P (isolate GK18) (HHV-8) (Kaposi's sarcoma-associated herpesvirus)	868565	Herpesvirales	Orthoherpesviridae
Q77DB4	Reston ebolavirus (strain Reston-89) (REBOV) (Reston Ebola virus)	386032	Mononegavirales	Filoviridae
Q2HRD3	Human herpesvirus 8 type P (isolate GK18) (HHV-8) (Kaposi's sarcoma-associated herpesvirus)	868565	Herpesvirales	Orthoherpesviridae
F5HCU8	Human cytomegalovirus (strain Merlin) (HHV-5) (Human herpesvirus 5)	295027	Herpesvirales	Orthoherpesviridae
Q3ZK63	Rotavirus A (isolate RVA/Human/Belgium/B4106/2000/G3P11[14]) (RV-A) (Rotavirus A (isolate B4106))	578843	Reovirales	Sedoreoviridae
F5H8Q3	Human cytomegalovirus (strain Merlin) (HHV-5) (Human herpesvirus 5)	295027	Herpesvirales	Orthoherpesviridae
F5HEN7	Human cytomegalovirus (strain Merlin) (HHV-5) (Human herpesvirus 5)	295027	Herpesvirales	Orthoherpesviridae
Q6SW14	Human cytomegalovirus (strain Merlin) (HHV-5) (Human herpesvirus 5)	295027	Herpesvirales	Orthoherpesviridae
Q6SWC5	Human cytomegalovirus (strain Merlin) (HHV-5) (Human herpesvirus 5)	295027	Herpesvirales	Orthoherpesviridae
Q6SWD0	Human cytomegalovirus (strain Merlin) (HHV-5) (Human herpesvirus 5)	295027	Herpesvirales	Orthoherpesviridae
Q9Q2P0	Epstein-Barr virus (strain B95-8) (HHV-4) (Human herpesvirus 4)	10377	Herpesvirales	Orthoherpesviridae
A0A161HLT0	Alphapapillomavirus 9	337041	Zurhausenvirales	Papillomaviridae
P88962	Human herpesvirus 8 type M	435895	Herpesvirales	Orthoherpesviridae
P88957	Human herpesvirus 8 type M	435895	Herpesvirales	Orthoherpesviridae
Q76QC2	Human spumaretrovirus (SFVcpz(hu)) (Human foamy virus)	11963	Ortervirales	Retroviridae
V9LMM7	Human cytomegalovirus (strain Merlin) (HHV-5) (Human herpesvirus 5)	295027	Herpesvirales	Orthoherpesviridae
F5HDD0	Human herpesvirus 8 type P (isolate GK18) (HHV-8) (Kaposi's sarcoma-associated herpesvirus)	868565	Herpesvirales	Orthoherpesviridae
F5HCH8	Human cytomegalovirus (strain Merlin) (HHV-5) (Human herpesvirus 5)	295027	Herpesvirales	Orthoherpesviridae
P26053	Influenza A virus (strain A/Seal/Massachusetts/1/1980 H7N7)	384493	Articulavirales	Orthomyxoviridae
Q99AU3	Influenza A virus (strain A/Brevig Mission/1/1918 H1N1) (Influenza A virus (strain A/South Carolina/1/1918 H1N1))	88776	Articulavirales	Orthomyxoviridae
P0CK45	Bovine papillomavirus type 1	337052	Zurhausenvirales	Papillomaviridae
P36710	Human adenovirus A serotype 12 (HAdV-12) (Human adenovirus 12)	28282	Rowavirales	Adenoviridae
F5H8Y5	Human herpesvirus 8 type P (isolate GK18) (HHV-8) (Kaposi's sarcoma-associated herpesvirus)	868565	Herpesvirales	Orthoherpesviridae
Q6SW63	Human cytomegalovirus (strain Merlin) (HHV-5) (Human herpesvirus 5)	295027	Herpesvirales	Orthoherpesviridae
F5HAE6	Human cytomegalovirus (strain Merlin) (HHV-5) (Human herpesvirus 5)	295027	Herpesvirales	Orthoherpesviridae
Q20NX5	Influenza A virus (A/mallard/Netherlands/12/2000(H7N3))	352515	Articulavirales	Orthomyxoviridae
Q38SQ9	Influenza A virus (A/Hong Kong/43/1975(H3N2))	351266	Articulavirales	Orthomyxoviridae
Q464B3	Influenza A virus (A/New York/392/2004(H3N2))	335341	Articulavirales	Orthomyxoviridae
F5HAS7	Human cytomegalovirus (strain Merlin) (HHV-5) (Human herpesvirus 5)	295027	Herpesvirales	Orthoherpesviridae
F5HEF3	Human cytomegalovirus (strain Merlin) (HHV-5) (Human herpesvirus 5)	295027	Herpesvirales	Orthoherpesviridae
Q6QCP6	Human herpesvirus 3 (HHV-3) (Varicella-zoster virus)	10335	Herpesvirales	Orthoherpesviridae
Q76RG2	Human herpesvirus 8 (HHV-8) (Kaposi's sarcoma-associated herpesvirus)	37296	Herpesvirales	Orthoherpesviridae
Q6TUZ6	Yaba monkey tumor virus (strain VR587) (YMTV)	928314	Chitovirales	Poxviridae
P88934	Human herpesvirus 8 type M	435895	Herpesvirales	Orthoherpesviridae
P88944	Human herpesvirus 8 type M	435895	Herpesvirales	Orthoherpesviridae
Q6RZE7	Rabbitpox virus (strain Utrecht) (RPV)	45417	Chitovirales	Poxviridae
P0DOF0	Borna disease virus (strain V) (BDV)	928296	Mononegavirales	Bornaviridae
Q77DJ6	Zaire ebolavirus (strain Kikwit-95) (ZEBOV) (Zaire Ebola virus)	128951	Mononegavirales	Filoviridae
P06794	Human papillomavirus type 18	333761	Zurhausenvirales	Papillomaviridae
Q2HRA7	Human herpesvirus 8 type P (isolate GK18) (HHV-8) (Kaposi's sarcoma-associated herpesvirus)	868565	Herpesvirales	Orthoherpesviridae
Q6DNN3	Influenza A virus (strain A/Vietnam/1203/2004 H5N1)	284218	Articulavirales	Orthomyxoviridae
Q5QF18	Influenza A virus (A/Thailand/1(KAN-1)/2004(H5N1))	266827	Articulavirales	Orthomyxoviridae
F5HF23	Human cytomegalovirus (strain Merlin) (HHV-5) (Human herpesvirus 5)	295027	Herpesvirales	Orthoherpesviridae
Q04234	Human cytomegalovirus (HHV-5) (Human herpesvirus 5)	10359	Herpesvirales	Orthoherpesviridae
Q76RJ0	Human herpesvirus 8 (HHV-8) (Kaposi's sarcoma-associated herpesvirus)	37296	Herpesvirales	Orthoherpesviridae

## Sheet: Extended Data Table 2
input_uniprot_id	canonical_accession	strict_group	likely_family_or_group	note	taxid	organism_name	taxonomy	taxonomy_lookup_status	taxonomy_sources	strict_group_original	benchmark_bin_original	likely_family_or_group_original	reclassification_status	reclassification_rationale
P04591	P04591	HIV	Retroviridae (HIV-1)	HIV-1 Gag polyprotein	11706	Human immunodeficiency virus type 1 group M subtype B (isolate HXB2)	{'query_status': 'ok', 'taxid': '11706', 'scientific_name': 'HIV-1 M:B_HXB2R', 'rank': 'no rank', 'lineage': 'Viruses; Riboviria; Pararnavirae; Artverviricota; Revtraviricetes; Ortervirales; Retroviridae; Orthoretrovirinae; Lentivirus; Lentivirus humimdef1; Human immunodeficiency virus 1; HIV-1 group M; HIV-1 M:B', 'lineage_nodes': [{'taxid': '10239', 'scientific_name': 'Viruses', 'rank': 'acellu…	ok	{'uniprot': {'query_status': 'ok', 'primary_accession': 'P04591', 'uni_prot_id': 'GAG_HV1H2', 'entry_type': 'UniProtKB reviewed (Swiss-Prot)', 'taxid': 11706, 'organism_name': 'Human immunodeficiency virus type 1 group M subtype B (isolate HXB2)', 'common_name': 'HIV-1', 'uniprot_lineage': [{'scientific_name': 'Viruses'}, {'scientific_name': 'Riboviria'}, {'scientific_name': 'Pararnavirae'}, {'sc…
Q72497	Q72497	HIV	Retroviridae (HIV-1)	HIV-1 Gag polyprotein	11676	Human immunodeficiency virus type 1	{'query_status': 'ok', 'taxid': '11676', 'scientific_name': 'Human immunodeficiency virus 1', 'rank': 'no rank', 'lineage': 'Viruses; Riboviria; Pararnavirae; Artverviricota; Revtraviricetes; Ortervirales; Retroviridae; Orthoretrovirinae; Lentivirus; Lentivirus humimdef1', 'lineage_nodes': [{'taxid': '10239', 'scientific_name': 'Viruses', 'rank': 'acellular root'}, {'taxid': '2559587', 'scientifi…	ok	{'uniprot': {'query_status': 'ok', 'primary_accession': 'Q72497', 'uni_prot_id': 'Q72497_HV1', 'entry_type': 'UniProtKB unreviewed (TrEMBL)', 'taxid': 11676, 'organism_name': 'Human immunodeficiency virus type 1', 'common_name': 'HIV-1', 'uniprot_lineage': [{'scientific_name': 'Viruses'}, {'scientific_name': 'Riboviria'}, {'scientific_name': 'Pararnavirae'}, {'scientific_name': 'Artverviricota'},…
P06423	P06423	HPV	Papillomaviridae (HPV-33)	E2 regulatory protein	10586	Human papillomavirus 33	{'query_status': 'ok', 'taxid': '10586', 'scientific_name': 'human papillomavirus 33', 'rank': 'serotype', 'lineage': 'Viruses; Monodnaviria; Shotokuvirae; Cossaviricota; Papovaviricetes; Zurhausenvirales; Papillomaviridae; Firstpapillomavirinae; Alphapapillomavirus; Alphapapillomavirus 9', 'lineage_nodes': [{'taxid': '10239', 'scientific_name': 'Viruses', 'rank': 'acellular root'}, {'taxid': '27…	ok	{'uniprot': {'query_status': 'ok', 'primary_accession': 'P06423', 'uni_prot_id': 'VE2_HPV33', 'entry_type': 'UniProtKB reviewed (Swiss-Prot)', 'taxid': 10586, 'organism_name': 'Human papillomavirus 33', 'common_name': None, 'uniprot_lineage': [{'scientific_name': 'Viruses'}, {'scientific_name': 'Monodnaviria'}, {'scientific_name': 'Shotokuvirae'}, {'scientific_name': 'Cossaviricota'}, {'scientifi…
P06465	P06465	HPV	Papillomaviridae (HPV-1)	E7 protein	10583	Human papillomavirus type 1	{'query_status': 'ok', 'taxid': '10583', 'scientific_name': 'Human papillomavirus type 1a', 'rank': 'serotype', 'lineage': 'Viruses; Monodnaviria; Shotokuvirae; Cossaviricota; Papovaviricetes; Zurhausenvirales; Papillomaviridae; Firstpapillomavirinae; Mupapillomavirus; Mupapillomavirus 1', 'lineage_nodes': [{'taxid': '10239', 'scientific_name': 'Viruses', 'rank': 'acellular root'}, {'taxid': '273…	ok	{'uniprot': {'query_status': 'ok', 'primary_accession': 'P06465', 'uni_prot_id': 'VE7_HPV1', 'entry_type': 'UniProtKB reviewed (Swiss-Prot)', 'taxid': 10583, 'organism_name': 'Human papillomavirus type 1', 'common_name': 'Human papillomavirus type 1a', 'uniprot_lineage': [{'scientific_name': 'Viruses'}, {'scientific_name': 'Monodnaviria'}, {'scientific_name': 'Shotokuvirae'}, {'scientific_name': …
P0DKB0	P0DKB0	HPV	Papillomaviridae (HPV-31)	E8^E2C-related HPV protein	10585	Human papillomavirus 31	{'query_status': 'ok', 'taxid': '10585', 'scientific_name': 'human papillomavirus 31', 'rank': 'serotype', 'lineage': 'Viruses; Monodnaviria; Shotokuvirae; Cossaviricota; Papovaviricetes; Zurhausenvirales; Papillomaviridae; Firstpapillomavirinae; Alphapapillomavirus; Alphapapillomavirus 9', 'lineage_nodes': [{'taxid': '10239', 'scientific_name': 'Viruses', 'rank': 'acellular root'}, {'taxid': '27…	ok	{'uniprot': {'query_status': 'ok', 'primary_accession': 'P0DKB0', 'uni_prot_id': 'VE8E2_HPV31', 'entry_type': 'UniProtKB reviewed (Swiss-Prot)', 'taxid': 10585, 'organism_name': 'Human papillomavirus 31', 'common_name': None, 'uniprot_lineage': [{'scientific_name': 'Viruses'}, {'scientific_name': 'Monodnaviria'}, {'scientific_name': 'Shotokuvirae'}, {'scientific_name': 'Cossaviricota'}, {'scienti…
P24830	P24830	HPV	Papillomaviridae (HPV-39)	E2 regulatory protein	10588	Human papillomavirus 39	{'query_status': 'ok', 'taxid': '10588', 'scientific_name': 'human papillomavirus 39', 'rank': 'serotype', 'lineage': 'Viruses; Monodnaviria; Shotokuvirae; Cossaviricota; Papovaviricetes; Zurhausenvirales; Papillomaviridae; Firstpapillomavirinae; Alphapapillomavirus; Alphapapillomavirus 7', 'lineage_nodes': [{'taxid': '10239', 'scientific_name': 'Viruses', 'rank': 'acellular root'}, {'taxid': '27…	ok	{'uniprot': {'query_status': 'ok', 'primary_accession': 'P24830', 'uni_prot_id': 'VE2_HPV39', 'entry_type': 'UniProtKB reviewed (Swiss-Prot)', 'taxid': 10588, 'organism_name': 'Human papillomavirus 39', 'common_name': None, 'uniprot_lineage': [{'scientific_name': 'Viruses'}, {'scientific_name': 'Monodnaviria'}, {'scientific_name': 'Shotokuvirae'}, {'scientific_name': 'Cossaviricota'}, {'scientifi…
P36800	P36800	HPV	Papillomaviridae (HPV-7)	HPV protein	10620	Human papillomavirus 7	{'query_status': 'ok', 'taxid': '10620', 'scientific_name': 'Human papillomavirus type 7', 'rank': 'serotype', 'lineage': 'Viruses; Monodnaviria; Shotokuvirae; Cossaviricota; Papovaviricetes; Zurhausenvirales; Papillomaviridae; Firstpapillomavirinae; Alphapapillomavirus; Alphapapillomavirus 8', 'lineage_nodes': [{'taxid': '10239', 'scientific_name': 'Viruses', 'rank': 'acellular root'}, {'taxid':…	ok	{'uniprot': {'query_status': 'ok', 'primary_accession': 'P36800', 'uni_prot_id': 'VE6_HPV07', 'entry_type': 'UniProtKB reviewed (Swiss-Prot)', 'taxid': 10620, 'organism_name': 'Human papillomavirus 7', 'common_name': None, 'uniprot_lineage': [{'scientific_name': 'Viruses'}, {'scientific_name': 'Monodnaviria'}, {'scientific_name': 'Shotokuvirae'}, {'scientific_name': 'Cossaviricota'}, {'scientific…
P27958-PRO_0000037566	P27958	Hepatitis	Flaviviridae (HCV)	likely HCV mature product	63746	Hepatitis C virus genotype 1a (isolate H77)	{'query_status': 'ok', 'taxid': '63746', 'scientific_name': 'Hepatitis C virus (isolate H77)', 'rank': 'no rank', 'lineage': 'Viruses; Riboviria; Orthornavirae; Kitrinoviricota; Flasuviricetes; Amarillovirales; Flaviviridae; Hepacivirus; Hepacivirus hominis; hepatitis C virus genotype 1a', 'lineage_nodes': [{'taxid': '10239', 'scientific_name': 'Viruses', 'rank': 'acellular root'}, {'taxid': '255…	ok	{'uniprot': {'query_status': 'ok', 'primary_accession': 'P27958', 'uni_prot_id': 'POLG_HCV77', 'entry_type': 'UniProtKB reviewed (Swiss-Prot)', 'taxid': 63746, 'organism_name': 'Hepatitis C virus genotype 1a (isolate H77)', 'common_name': 'HCV', 'uniprot_lineage': [{'scientific_name': 'Viruses'}, {'scientific_name': 'Riboviria'}, {'scientific_name': 'Orthornavirae'}, {'scientific_name': 'Kitrinov…
P29846-PRO_0000037666	P29846	Hepatitis	Flaviviridae (HCV)	likely HCV mature product	31645	Hepatitis C virus genotype 1b (isolate Taiwan)	{'query_status': 'ok', 'taxid': '31645', 'scientific_name': 'Hepatitis C virus (isolate Taiwan)', 'rank': 'no rank', 'lineage': 'Viruses; Riboviria; Orthornavirae; Kitrinoviricota; Flasuviricetes; Amarillovirales; Flaviviridae; Hepacivirus; Hepacivirus hominis; Hepatitis C virus genotype 1; Hepatitis C virus subtype 1b', 'lineage_nodes': [{'taxid': '10239', 'scientific_name': 'Viruses', 'rank': '…	ok	{'uniprot': {'query_status': 'ok', 'primary_accession': 'P29846', 'uni_prot_id': 'POLG_HCVTW', 'entry_type': 'UniProtKB reviewed (Swiss-Prot)', 'taxid': 31645, 'organism_name': 'Hepatitis C virus genotype 1b (isolate Taiwan)', 'common_name': 'HCV', 'uniprot_lineage': [{'scientific_name': 'Viruses'}, {'scientific_name': 'Riboviria'}, {'scientific_name': 'Orthornavirae'}, {'scientific_name': 'Kitri…
Q5I3N2	Q5I3N2	Others	Sedoreoviridae (Bluetongue virus / orbivirus-like)	likely typo/legacy accession close to HCV entry Q5I2N3	40051	Bluetongue virus	{'query_status': 'ok', 'taxid': '40051', 'scientific_name': 'Bluetongue virus', 'rank': 'no rank', 'lineage': 'Viruses; Riboviria; Orthornavirae; Duplornaviricota; Resentoviricetes; Reovirales; Sedoreoviridae; Orbivirus; Orbivirus caerulinguae', 'lineage_nodes': [{'taxid': '10239', 'scientific_name': 'Viruses', 'rank': 'acellular root'}, {'taxid': '2559587', 'scientific_name': 'Riboviria', 'rank'…	ok	{'uniprot': {'query_status': 'ok', 'primary_accession': 'Q5I3N2', 'uni_prot_id': 'Q5I3N2_BTV', 'entry_type': 'UniProtKB unreviewed (TrEMBL)', 'taxid': 40051, 'organism_name': 'Bluetongue virus', 'common_name': 'BTV', 'uniprot_lineage': [{'scientific_name': 'Viruses'}, {'scientific_name': 'Riboviria'}, {'scientific_name': 'Orthornavirae'}, {'scientific_name': 'Duplornaviricota'}, {'scientific_name…	Hepatitis	Hepatitis	likely Flaviviridae (HCV)	reclassified	taxonomy is Sedoreoviridae/Orbivirus-like and does not fit the Hepatitis bin
Q69027	Q69027	Hepatitis	Hepadnaviridae (HBV)	HBV X protein	928302	Hepatitis B virus genotype C subtype ayr (isolate Human/Japan/Okamoto/-)	{'query_status': 'ok', 'taxid': '928302', 'scientific_name': 'Hepatitis B virus C/ayr human/Japan/Okamoto', 'rank': 'no rank', 'lineage': 'Viruses; Riboviria; Pararnavirae; Artverviricota; Revtraviricetes; Blubervirales; Hepadnaviridae; Orthohepadnavirus; Orthohepadnavirus hominoidei; Hepatitis B virus; hepatitis B virus genotype C', 'lineage_nodes': [{'taxid': '10239', 'scientific_name': 'Viruse…	ok	{'uniprot': {'query_status': 'ok', 'primary_accession': 'Q69027', 'uni_prot_id': 'X_HBVCJ', 'entry_type': 'UniProtKB reviewed (Swiss-Prot)', 'taxid': 928302, 'organism_name': 'Hepatitis B virus genotype C subtype ayr (isolate Human/Japan/Okamoto/-)', 'common_name': 'HBV-C', 'uniprot_lineage': [{'scientific_name': 'Viruses'}, {'scientific_name': 'Riboviria'}, {'scientific_name': 'Pararnavirae'}, {…
A0A1P7U033	A0A1P7U033	Herpes	Orthoherpesviridae (EBV)	EBV BILF1	82830	Epstein-Barr virus (strain AG876)	{'query_status': 'ok', 'taxid': '82830', 'scientific_name': 'Epstein-barr virus strain ag876', 'rank': 'no rank', 'lineage': 'Viruses; Duplodnaviria; Heunggongvirae; Peploviricota; Herviviricetes; Herpesvirales; Orthoherpesviridae; Gammaherpesvirinae; Lymphocryptovirus; Lymphocryptovirus humangamma4; human gammaherpesvirus 4', 'lineage_nodes': [{'taxid': '10239', 'scientific_name': 'Viruses', 'ra…	ok	{'uniprot': {'query_status': 'ok', 'primary_accession': 'A0A1P7U033', 'uni_prot_id': 'A0A1P7U033_EBVA8', 'entry_type': 'UniProtKB unreviewed (TrEMBL)', 'taxid': 82830, 'organism_name': 'Epstein-Barr virus (strain AG876)', 'common_name': 'HHV-4', 'uniprot_lineage': [{'scientific_name': 'Viruses'}, {'scientific_name': 'Duplodnaviria'}, {'scientific_name': 'Heunggongvirae'}, {'scientific_name': 'Pep…
F5HB53	F5HB53	Herpes	Orthoherpesviridae	likely herpesvirus protein	295027	Human cytomegalovirus (strain Merlin)	{'query_status': 'ok', 'taxid': '295027', 'scientific_name': 'Human herpesvirus 5 strain Merlin', 'rank': 'no rank', 'lineage': 'Viruses; Duplodnaviria; Heunggongvirae; Peploviricota; Herviviricetes; Herpesvirales; Orthoherpesviridae; Betaherpesvirinae; Cytomegalovirus; Cytomegalovirus humanbeta5; Human betaherpesvirus 5', 'lineage_nodes': [{'taxid': '10239', 'scientific_name': 'Viruses', 'rank':…	ok	{'uniprot': {'query_status': 'ok', 'primary_accession': 'F5HB53', 'uni_prot_id': 'GB_HCMVM', 'entry_type': 'UniProtKB reviewed (Swiss-Prot)', 'taxid': 295027, 'organism_name': 'Human cytomegalovirus (strain Merlin)', 'common_name': 'HHV-5', 'uniprot_lineage': [{'scientific_name': 'Viruses'}, {'scientific_name': 'Duplodnaviria'}, {'scientific_name': 'Heunggongvirae'}, {'scientific_name': 'Peplovir…
G9I284	G9I284	Herpes	Orthoherpesviridae (HHV-2)	HHV-2 virion protein US2	10310	Human herpesvirus 2	{'query_status': 'ok', 'taxid': '10310', 'scientific_name': 'Human alphaherpesvirus 2', 'rank': 'no rank', 'lineage': 'Viruses; Duplodnaviria; Heunggongvirae; Peploviricota; Herviviricetes; Herpesvirales; Orthoherpesviridae; Alphaherpesvirinae; Simplexvirus; Simplexvirus humanalpha2', 'lineage_nodes': [{'taxid': '10239', 'scientific_name': 'Viruses', 'rank': 'acellular root'}, {'taxid': '2731341'…	ok	{'uniprot': {'query_status': 'ok', 'primary_accession': 'G9I284', 'uni_prot_id': 'G9I284_HHV2', 'entry_type': 'UniProtKB unreviewed (TrEMBL)', 'taxid': 10310, 'organism_name': 'Human herpesvirus 2', 'common_name': 'HHV-2', 'uniprot_lineage': [{'scientific_name': 'Viruses'}, {'scientific_name': 'Duplodnaviria'}, {'scientific_name': 'Heunggongvirae'}, {'scientific_name': 'Peploviricota'}, {'scienti…
O41969	O41969	Herpes	Orthoherpesviridae	likely herpesvirus protein	33708	Murid herpesvirus 4	{'query_status': 'ok', 'taxid': '33708', 'scientific_name': 'Murid gammaherpesvirus 4', 'rank': 'no rank', 'lineage': 'Viruses; Duplodnaviria; Heunggongvirae; Peploviricota; Herviviricetes; Herpesvirales; Orthoherpesviridae; Gammaherpesvirinae; Rhadinovirus; Rhadinovirus muridgamma4', 'lineage_nodes': [{'taxid': '10239', 'scientific_name': 'Viruses', 'rank': 'acellular root'}, {'taxid': '2731341'…	ok	{'uniprot': {'query_status': 'ok', 'primary_accession': 'O41969', 'uni_prot_id': 'O41969_MHV68', 'entry_type': 'UniProtKB unreviewed (TrEMBL)', 'taxid': 33708, 'organism_name': 'Murid herpesvirus 4', 'common_name': 'MuHV-4', 'uniprot_lineage': [{'scientific_name': 'Viruses'}, {'scientific_name': 'Duplodnaviria'}, {'scientific_name': 'Heunggongvirae'}, {'scientific_name': 'Peploviricota'}, {'scien…
P03208	P03208	Herpes	Orthoherpesviridae (EBV)	EBV BILF1	10377	Epstein-Barr virus (strain B95-8)	{'query_status': 'ok', 'taxid': '10377', 'scientific_name': 'Human herpesvirus 4 strain B95-8', 'rank': 'no rank', 'lineage': 'Viruses; Duplodnaviria; Heunggongvirae; Peploviricota; Herviviricetes; Herpesvirales; Orthoherpesviridae; Gammaherpesvirinae; Lymphocryptovirus; Lymphocryptovirus humangamma4; human gammaherpesvirus 4', 'lineage_nodes': [{'taxid': '10239', 'scientific_name': 'Viruses', 'r…	ok	{'uniprot': {'query_status': 'ok', 'primary_accession': 'P03208', 'uni_prot_id': 'BILF1_EBVB9', 'entry_type': 'UniProtKB reviewed (Swiss-Prot)', 'taxid': 10377, 'organism_name': 'Epstein-Barr virus (strain B95-8)', 'common_name': 'HHV-4', 'uniprot_lineage': [{'scientific_name': 'Viruses'}, {'scientific_name': 'Duplodnaviria'}, {'scientific_name': 'Heunggongvirae'}, {'scientific_name': 'Peploviric…
P06485	P06485	Herpes	Orthoherpesviridae	likely herpesvirus protein	10299	Human herpesvirus 1 (strain 17)	{'query_status': 'ok', 'taxid': '10299', 'scientific_name': 'Human alphaherpesvirus 1 strain 17', 'rank': 'no rank', 'lineage': 'Viruses; Duplodnaviria; Heunggongvirae; Peploviricota; Herviviricetes; Herpesvirales; Orthoherpesviridae; Alphaherpesvirinae; Simplexvirus; Simplexvirus humanalpha1; Human alphaherpesvirus 1', 'lineage_nodes': [{'taxid': '10239', 'scientific_name': 'Viruses', 'rank': 'a…	ok	{'uniprot': {'query_status': 'ok', 'primary_accession': 'P06485', 'uni_prot_id': 'US02_HHV11', 'entry_type': 'UniProtKB reviewed (Swiss-Prot)', 'taxid': 10299, 'organism_name': 'Human herpesvirus 1 (strain 17)', 'common_name': 'HHV-1', 'uniprot_lineage': [{'scientific_name': 'Viruses'}, {'scientific_name': 'Duplodnaviria'}, {'scientific_name': 'Heunggongvirae'}, {'scientific_name': 'Peploviricota…
P06486	P06486	Herpes	Orthoherpesviridae	likely herpesvirus protein	10299	Human herpesvirus 1 (strain 17)	{'query_status': 'ok', 'taxid': '10299', 'scientific_name': 'Human alphaherpesvirus 1 strain 17', 'rank': 'no rank', 'lineage': 'Viruses; Duplodnaviria; Heunggongvirae; Peploviricota; Herviviricetes; Herpesvirales; Orthoherpesviridae; Alphaherpesvirinae; Simplexvirus; Simplexvirus humanalpha1; Human alphaherpesvirus 1', 'lineage_nodes': [{'taxid': '10239', 'scientific_name': 'Viruses', 'rank': 'a…	ok	{'uniprot': {'query_status': 'ok', 'primary_accession': 'P06486', 'uni_prot_id': 'US10_HHV11', 'entry_type': 'UniProtKB reviewed (Swiss-Prot)', 'taxid': 10299, 'organism_name': 'Human herpesvirus 1 (strain 17)', 'common_name': 'HHV-1', 'uniprot_lineage': [{'scientific_name': 'Viruses'}, {'scientific_name': 'Duplodnaviria'}, {'scientific_name': 'Heunggongvirae'}, {'scientific_name': 'Peploviricota…
P06492	P06492	Herpes	Orthoherpesviridae (HHV-1)	HSV-1 VP16	10299	Human herpesvirus 1 (strain 17)	{'query_status': 'ok', 'taxid': '10299', 'scientific_name': 'Human alphaherpesvirus 1 strain 17', 'rank': 'no rank', 'lineage': 'Viruses; Duplodnaviria; Heunggongvirae; Peploviricota; Herviviricetes; Herpesvirales; Orthoherpesviridae; Alphaherpesvirinae; Simplexvirus; Simplexvirus humanalpha1; Human alphaherpesvirus 1', 'lineage_nodes': [{'taxid': '10239', 'scientific_name': 'Viruses', 'rank': 'a…	ok	{'uniprot': {'query_status': 'ok', 'primary_accession': 'P06492', 'uni_prot_id': 'VP16_HHV11', 'entry_type': 'UniProtKB reviewed (Swiss-Prot)', 'taxid': 10299, 'organism_name': 'Human herpesvirus 1 (strain 17)', 'common_name': 'HHV-1', 'uniprot_lineage': [{'scientific_name': 'Viruses'}, {'scientific_name': 'Duplodnaviria'}, {'scientific_name': 'Heunggongvirae'}, {'scientific_name': 'Peploviricota…
P08392	P08392	Herpes	Orthoherpesviridae	likely herpesvirus protein	10299	Human herpesvirus 1 (strain 17)	{'query_status': 'ok', 'taxid': '10299', 'scientific_name': 'Human alphaherpesvirus 1 strain 17', 'rank': 'no rank', 'lineage': 'Viruses; Duplodnaviria; Heunggongvirae; Peploviricota; Herviviricetes; Herpesvirales; Orthoherpesviridae; Alphaherpesvirinae; Simplexvirus; Simplexvirus humanalpha1; Human alphaherpesvirus 1', 'lineage_nodes': [{'taxid': '10239', 'scientific_name': 'Viruses', 'rank': 'a…	ok	{'uniprot': {'query_status': 'ok', 'primary_accession': 'P08392', 'uni_prot_id': 'ICP4_HHV11', 'entry_type': 'UniProtKB reviewed (Swiss-Prot)', 'taxid': 10299, 'organism_name': 'Human herpesvirus 1 (strain 17)', 'common_name': 'HHV-1', 'uniprot_lineage': [{'scientific_name': 'Viruses'}, {'scientific_name': 'Duplodnaviria'}, {'scientific_name': 'Heunggongvirae'}, {'scientific_name': 'Peploviricota…
P08393	P08393	Herpes	Orthoherpesviridae	likely herpesvirus protein	10299	Human herpesvirus 1 (strain 17)	{'query_status': 'ok', 'taxid': '10299', 'scientific_name': 'Human alphaherpesvirus 1 strain 17', 'rank': 'no rank', 'lineage': 'Viruses; Duplodnaviria; Heunggongvirae; Peploviricota; Herviviricetes; Herpesvirales; Orthoherpesviridae; Alphaherpesvirinae; Simplexvirus; Simplexvirus humanalpha1; Human alphaherpesvirus 1', 'lineage_nodes': [{'taxid': '10239', 'scientific_name': 'Viruses', 'rank': 'a…	ok	{'uniprot': {'query_status': 'ok', 'primary_accession': 'P08393', 'uni_prot_id': 'ICP0_HHV11', 'entry_type': 'UniProtKB reviewed (Swiss-Prot)', 'taxid': 10299, 'organism_name': 'Human herpesvirus 1 (strain 17)', 'common_name': 'HHV-1', 'uniprot_lineage': [{'scientific_name': 'Viruses'}, {'scientific_name': 'Duplodnaviria'}, {'scientific_name': 'Heunggongvirae'}, {'scientific_name': 'Peploviricota…
P0C705	P0C705	Herpes	Orthoherpesviridae (EBV)	EBV capsid vertex component 2	82830	Epstein-Barr virus (strain AG876)	{'query_status': 'ok', 'taxid': '82830', 'scientific_name': 'Epstein-barr virus strain ag876', 'rank': 'no rank', 'lineage': 'Viruses; Duplodnaviria; Heunggongvirae; Peploviricota; Herviviricetes; Herpesvirales; Orthoherpesviridae; Gammaherpesvirinae; Lymphocryptovirus; Lymphocryptovirus humangamma4; human gammaherpesvirus 4', 'lineage_nodes': [{'taxid': '10239', 'scientific_name': 'Viruses', 'ra…	ok	{'uniprot': {'query_status': 'ok', 'primary_accession': 'P0C705', 'uni_prot_id': 'CVC2_EBVA8', 'entry_type': 'UniProtKB reviewed (Swiss-Prot)', 'taxid': 82830, 'organism_name': 'Epstein-Barr virus (strain AG876)', 'common_name': 'HHV-4', 'uniprot_lineage': [{'scientific_name': 'Viruses'}, {'scientific_name': 'Duplodnaviria'}, {'scientific_name': 'Heunggongvirae'}, {'scientific_name': 'Peplovirico…
P0C726	P0C726	Herpes	Orthoherpesviridae (EBV)	likely EBV protein	82830	Epstein-Barr virus (strain AG876)	{'query_status': 'ok', 'taxid': '82830', 'scientific_name': 'Epstein-barr virus strain ag876', 'rank': 'no rank', 'lineage': 'Viruses; Duplodnaviria; Heunggongvirae; Peploviricota; Herviviricetes; Herpesvirales; Orthoherpesviridae; Gammaherpesvirinae; Lymphocryptovirus; Lymphocryptovirus humangamma4; human gammaherpesvirus 4', 'lineage_nodes': [{'taxid': '10239', 'scientific_name': 'Viruses', 'ra…	ok	{'uniprot': {'query_status': 'ok', 'primary_accession': 'P0C726', 'uni_prot_id': 'LF2_EBVA8', 'entry_type': 'UniProtKB reviewed (Swiss-Prot)', 'taxid': 82830, 'organism_name': 'Epstein-Barr virus (strain AG876)', 'common_name': 'HHV-4', 'uniprot_lineage': [{'scientific_name': 'Viruses'}, {'scientific_name': 'Duplodnaviria'}, {'scientific_name': 'Heunggongvirae'}, {'scientific_name': 'Peploviricot…
P0C737	P0C737	Herpes	Orthoherpesviridae (EBV)	EBV BNLF2a	82830	Epstein-Barr virus (strain AG876)	{'query_status': 'ok', 'taxid': '82830', 'scientific_name': 'Epstein-barr virus strain ag876', 'rank': 'no rank', 'lineage': 'Viruses; Duplodnaviria; Heunggongvirae; Peploviricota; Herviviricetes; Herpesvirales; Orthoherpesviridae; Gammaherpesvirinae; Lymphocryptovirus; Lymphocryptovirus humangamma4; human gammaherpesvirus 4', 'lineage_nodes': [{'taxid': '10239', 'scientific_name': 'Viruses', 'ra…	ok	{'uniprot': {'query_status': 'ok', 'primary_accession': 'P0C737', 'uni_prot_id': 'BNL2A_EBVA8', 'entry_type': 'UniProtKB reviewed (Swiss-Prot)', 'taxid': 82830, 'organism_name': 'Epstein-Barr virus (strain AG876)', 'common_name': 'HHV-4', 'uniprot_lineage': [{'scientific_name': 'Viruses'}, {'scientific_name': 'Duplodnaviria'}, {'scientific_name': 'Heunggongvirae'}, {'scientific_name': 'Peploviric…
P0C739	P0C739	Herpes	Orthoherpesviridae (EBV)	likely EBV protein	10377	Epstein-Barr virus (strain B95-8)	{'query_status': 'ok', 'taxid': '10377', 'scientific_name': 'Human herpesvirus 4 strain B95-8', 'rank': 'no rank', 'lineage': 'Viruses; Duplodnaviria; Heunggongvirae; Peploviricota; Herviviricetes; Herpesvirales; Orthoherpesviridae; Gammaherpesvirinae; Lymphocryptovirus; Lymphocryptovirus humangamma4; human gammaherpesvirus 4', 'lineage_nodes': [{'taxid': '10239', 'scientific_name': 'Viruses', 'r…	ok	{'uniprot': {'query_status': 'ok', 'primary_accession': 'P0C739', 'uni_prot_id': 'BNL2A_EBVB9', 'entry_type': 'UniProtKB reviewed (Swiss-Prot)', 'taxid': 10377, 'organism_name': 'Epstein-Barr virus (strain B95-8)', 'common_name': 'HHV-4', 'uniprot_lineage': [{'scientific_name': 'Viruses'}, {'scientific_name': 'Duplodnaviria'}, {'scientific_name': 'Heunggongvirae'}, {'scientific_name': 'Peploviric…
P10204	P10204	Herpes	Orthoherpesviridae (HHV-1)	HSV-1 UL20 protein	10299	Human herpesvirus 1 (strain 17)	{'query_status': 'ok', 'taxid': '10299', 'scientific_name': 'Human alphaherpesvirus 1 strain 17', 'rank': 'no rank', 'lineage': 'Viruses; Duplodnaviria; Heunggongvirae; Peploviricota; Herviviricetes; Herpesvirales; Orthoherpesviridae; Alphaherpesvirinae; Simplexvirus; Simplexvirus humanalpha1; Human alphaherpesvirus 1', 'lineage_nodes': [{'taxid': '10239', 'scientific_name': 'Viruses', 'rank': 'a…	ok	{'uniprot': {'query_status': 'ok', 'primary_accession': 'P10204', 'uni_prot_id': 'UL20_HHV11', 'entry_type': 'UniProtKB reviewed (Swiss-Prot)', 'taxid': 10299, 'organism_name': 'Human herpesvirus 1 (strain 17)', 'common_name': 'HHV-1', 'uniprot_lineage': [{'scientific_name': 'Viruses'}, {'scientific_name': 'Duplodnaviria'}, {'scientific_name': 'Heunggongvirae'}, {'scientific_name': 'Peploviricota…
P10218	P10218	Herpes	Orthoherpesviridae	likely herpesvirus protein	10299	Human herpesvirus 1 (strain 17)	{'query_status': 'ok', 'taxid': '10299', 'scientific_name': 'Human alphaherpesvirus 1 strain 17', 'rank': 'no rank', 'lineage': 'Viruses; Duplodnaviria; Heunggongvirae; Peploviricota; Herviviricetes; Herpesvirales; Orthoherpesviridae; Alphaherpesvirinae; Simplexvirus; Simplexvirus humanalpha1; Human alphaherpesvirus 1', 'lineage_nodes': [{'taxid': '10239', 'scientific_name': 'Viruses', 'rank': 'a…	ok	{'uniprot': {'query_status': 'ok', 'primary_accession': 'P10218', 'uni_prot_id': 'NEC2_HHV11', 'entry_type': 'UniProtKB reviewed (Swiss-Prot)', 'taxid': 10299, 'organism_name': 'Human herpesvirus 1 (strain 17)', 'common_name': 'HHV-1', 'uniprot_lineage': [{'scientific_name': 'Viruses'}, {'scientific_name': 'Duplodnaviria'}, {'scientific_name': 'Heunggongvirae'}, {'scientific_name': 'Peploviricota…
P10219	P10219	Herpes	Orthoherpesviridae	likely herpesvirus protein	10299	Human herpesvirus 1 (strain 17)	{'query_status': 'ok', 'taxid': '10299', 'scientific_name': 'Human alphaherpesvirus 1 strain 17', 'rank': 'no rank', 'lineage': 'Viruses; Duplodnaviria; Heunggongvirae; Peploviricota; Herviviricetes; Herpesvirales; Orthoherpesviridae; Alphaherpesvirinae; Simplexvirus; Simplexvirus humanalpha1; Human alphaherpesvirus 1', 'lineage_nodes': [{'taxid': '10239', 'scientific_name': 'Viruses', 'rank': 'a…	ok	{'uniprot': {'query_status': 'ok', 'primary_accession': 'P10219', 'uni_prot_id': 'SCP_HHV11', 'entry_type': 'UniProtKB reviewed (Swiss-Prot)', 'taxid': 10299, 'organism_name': 'Human herpesvirus 1 (strain 17)', 'common_name': 'HHV-1', 'uniprot_lineage': [{'scientific_name': 'Viruses'}, {'scientific_name': 'Duplodnaviria'}, {'scientific_name': 'Heunggongvirae'}, {'scientific_name': 'Peploviricota'…
P10225	P10225	Herpes	Orthoherpesviridae (HHV-1)	HSV-1 UL41/vhs protein	10299	Human herpesvirus 1 (strain 17)	{'query_status': 'ok', 'taxid': '10299', 'scientific_name': 'Human alphaherpesvirus 1 strain 17', 'rank': 'no rank', 'lineage': 'Viruses; Duplodnaviria; Heunggongvirae; Peploviricota; Herviviricetes; Herpesvirales; Orthoherpesviridae; Alphaherpesvirinae; Simplexvirus; Simplexvirus humanalpha1; Human alphaherpesvirus 1', 'lineage_nodes': [{'taxid': '10239', 'scientific_name': 'Viruses', 'rank': 'a…	ok	{'uniprot': {'query_status': 'ok', 'primary_accession': 'P10225', 'uni_prot_id': 'SHUT_HHV11', 'entry_type': 'UniProtKB reviewed (Swiss-Prot)', 'taxid': 10299, 'organism_name': 'Human herpesvirus 1 (strain 17)', 'common_name': 'HHV-1', 'uniprot_lineage': [{'scientific_name': 'Viruses'}, {'scientific_name': 'Duplodnaviria'}, {'scientific_name': 'Heunggongvirae'}, {'scientific_name': 'Peploviricota…
P10227	P10227	Herpes	Orthoherpesviridae (HHV-1)	HSV-1 UL43 membrane protein	10299	Human herpesvirus 1 (strain 17)	{'query_status': 'ok', 'taxid': '10299', 'scientific_name': 'Human alphaherpesvirus 1 strain 17', 'rank': 'no rank', 'lineage': 'Viruses; Duplodnaviria; Heunggongvirae; Peploviricota; Herviviricetes; Herpesvirales; Orthoherpesviridae; Alphaherpesvirinae; Simplexvirus; Simplexvirus humanalpha1; Human alphaherpesvirus 1', 'lineage_nodes': [{'taxid': '10239', 'scientific_name': 'Viruses', 'rank': 'a…	ok	{'uniprot': {'query_status': 'ok', 'primary_accession': 'P10227', 'uni_prot_id': 'MB43_HHV11', 'entry_type': 'UniProtKB reviewed (Swiss-Prot)', 'taxid': 10299, 'organism_name': 'Human herpesvirus 1 (strain 17)', 'common_name': 'HHV-1', 'uniprot_lineage': [{'scientific_name': 'Viruses'}, {'scientific_name': 'Duplodnaviria'}, {'scientific_name': 'Heunggongvirae'}, {'scientific_name': 'Peploviricota…
P10231	P10231	Herpes	Orthoherpesviridae (HHV-1)	HSV-1 UL47 tegument protein	10299	Human herpesvirus 1 (strain 17)	{'query_status': 'ok', 'taxid': '10299', 'scientific_name': 'Human alphaherpesvirus 1 strain 17', 'rank': 'no rank', 'lineage': 'Viruses; Duplodnaviria; Heunggongvirae; Peploviricota; Herviviricetes; Herpesvirales; Orthoherpesviridae; Alphaherpesvirinae; Simplexvirus; Simplexvirus humanalpha1; Human alphaherpesvirus 1', 'lineage_nodes': [{'taxid': '10239', 'scientific_name': 'Viruses', 'rank': 'a…	ok	{'uniprot': {'query_status': 'ok', 'primary_accession': 'P10231', 'uni_prot_id': 'TEG5_HHV11', 'entry_type': 'UniProtKB reviewed (Swiss-Prot)', 'taxid': 10299, 'organism_name': 'Human herpesvirus 1 (strain 17)', 'common_name': 'HHV-1', 'uniprot_lineage': [{'scientific_name': 'Viruses'}, {'scientific_name': 'Duplodnaviria'}, {'scientific_name': 'Heunggongvirae'}, {'scientific_name': 'Peploviricota…
P36313	P36313	Herpes	Orthoherpesviridae	likely herpesvirus protein	10299	Human herpesvirus 1 (strain 17)	{'query_status': 'ok', 'taxid': '10299', 'scientific_name': 'Human alphaherpesvirus 1 strain 17', 'rank': 'no rank', 'lineage': 'Viruses; Duplodnaviria; Heunggongvirae; Peploviricota; Herviviricetes; Herpesvirales; Orthoherpesviridae; Alphaherpesvirinae; Simplexvirus; Simplexvirus humanalpha1; Human alphaherpesvirus 1', 'lineage_nodes': [{'taxid': '10239', 'scientific_name': 'Viruses', 'rank': 'a…	ok	{'uniprot': {'query_status': 'ok', 'primary_accession': 'P36313', 'uni_prot_id': 'ICP34_HHV11', 'entry_type': 'UniProtKB reviewed (Swiss-Prot)', 'taxid': 10299, 'organism_name': 'Human herpesvirus 1 (strain 17)', 'common_name': 'HHV-1', 'uniprot_lineage': [{'scientific_name': 'Viruses'}, {'scientific_name': 'Duplodnaviria'}, {'scientific_name': 'Heunggongvirae'}, {'scientific_name': 'Peploviricot…
P68336	P68336	Herpes	Orthoherpesviridae (HHV-2)	HHV-2 VP16	10315	Human herpesvirus 2 (strain HG52)	{'query_status': 'ok', 'taxid': '10315', 'scientific_name': 'Human herpesvirus 2 strain HG52', 'rank': 'no rank', 'lineage': 'Viruses; Duplodnaviria; Heunggongvirae; Peploviricota; Herviviricetes; Herpesvirales; Orthoherpesviridae; Alphaherpesvirinae; Simplexvirus; Simplexvirus humanalpha2; Human alphaherpesvirus 2', 'lineage_nodes': [{'taxid': '10239', 'scientific_name': 'Viruses', 'rank': 'acel…	ok	{'uniprot': {'query_status': 'ok', 'primary_accession': 'P68336', 'uni_prot_id': 'VP16_HHV2H', 'entry_type': 'UniProtKB reviewed (Swiss-Prot)', 'taxid': 10315, 'organism_name': 'Human herpesvirus 2 (strain HG52)', 'common_name': 'HHV-2', 'uniprot_lineage': [{'scientific_name': 'Viruses'}, {'scientific_name': 'Duplodnaviria'}, {'scientific_name': 'Heunggongvirae'}, {'scientific_name': 'Peplovirico…
P88992	P88992	Herpes	Orthoherpesviridae	likely herpesvirus protein	33708	Murid herpesvirus 4	{'query_status': 'ok', 'taxid': '33708', 'scientific_name': 'Murid gammaherpesvirus 4', 'rank': 'no rank', 'lineage': 'Viruses; Duplodnaviria; Heunggongvirae; Peploviricota; Herviviricetes; Herpesvirales; Orthoherpesviridae; Gammaherpesvirinae; Rhadinovirus; Rhadinovirus muridgamma4', 'lineage_nodes': [{'taxid': '10239', 'scientific_name': 'Viruses', 'rank': 'acellular root'}, {'taxid': '2731341'…	ok	{'uniprot': {'query_status': 'ok', 'primary_accession': 'P88992', 'uni_prot_id': 'P88992_MHV68', 'entry_type': 'UniProtKB unreviewed (TrEMBL)', 'taxid': 33708, 'organism_name': 'Murid herpesvirus 4', 'common_name': 'MuHV-4', 'uniprot_lineage': [{'scientific_name': 'Viruses'}, {'scientific_name': 'Duplodnaviria'}, {'scientific_name': 'Heunggongvirae'}, {'scientific_name': 'Peploviricota'}, {'scien…
P88993	P88993	Herpes	Orthoherpesviridae	likely herpesvirus protein	33708	Murid herpesvirus 4	{'query_status': 'ok', 'taxid': '33708', 'scientific_name': 'Murid gammaherpesvirus 4', 'rank': 'no rank', 'lineage': 'Viruses; Duplodnaviria; Heunggongvirae; Peploviricota; Herviviricetes; Herpesvirales; Orthoherpesviridae; Gammaherpesvirinae; Rhadinovirus; Rhadinovirus muridgamma4', 'lineage_nodes': [{'taxid': '10239', 'scientific_name': 'Viruses', 'rank': 'acellular root'}, {'taxid': '2731341'…	ok	{'uniprot': {'query_status': 'ok', 'primary_accession': 'P88993', 'uni_prot_id': 'P88993_MHV68', 'entry_type': 'UniProtKB unreviewed (TrEMBL)', 'taxid': 33708, 'organism_name': 'Murid herpesvirus 4', 'common_name': 'MuHV-4', 'uniprot_lineage': [{'scientific_name': 'Viruses'}, {'scientific_name': 'Duplodnaviria'}, {'scientific_name': 'Heunggongvirae'}, {'scientific_name': 'Peploviricota'}, {'scien…
P89884	P89884	Herpes	Orthoherpesviridae	likely herpesvirus protein	33708	Murid herpesvirus 4	{'query_status': 'ok', 'taxid': '33708', 'scientific_name': 'Murid gammaherpesvirus 4', 'rank': 'no rank', 'lineage': 'Viruses; Duplodnaviria; Heunggongvirae; Peploviricota; Herviviricetes; Herpesvirales; Orthoherpesviridae; Gammaherpesvirinae; Rhadinovirus; Rhadinovirus muridgamma4', 'lineage_nodes': [{'taxid': '10239', 'scientific_name': 'Viruses', 'rank': 'acellular root'}, {'taxid': '2731341'…	ok	{'uniprot': {'query_status': 'ok', 'primary_accession': 'P89884', 'uni_prot_id': 'ARBH_MHV68', 'entry_type': 'UniProtKB reviewed (Swiss-Prot)', 'taxid': 33708, 'organism_name': 'Murid herpesvirus 4', 'common_name': 'MuHV-4', 'uniprot_lineage': [{'scientific_name': 'Viruses'}, {'scientific_name': 'Duplodnaviria'}, {'scientific_name': 'Heunggongvirae'}, {'scientific_name': 'Peploviricota'}, {'scien…
Q2HR82	Q2HR82	Herpes	Orthoherpesviridae (HHV-8)	K8/K-bZIP protein	868565	Human herpesvirus 8 type P (isolate GK18)	{'query_status': 'ok', 'taxid': '868565', 'scientific_name': 'Human herpesvirus 8 strain GK18', 'rank': 'no rank', 'lineage': 'Viruses; Duplodnaviria; Heunggongvirae; Peploviricota; Herviviricetes; Herpesvirales; Orthoherpesviridae; Gammaherpesvirinae; Rhadinovirus; Rhadinovirus humangamma8; Human gammaherpesvirus 8', 'lineage_nodes': [{'taxid': '10239', 'scientific_name': 'Viruses', 'rank': 'ace…	ok	{'uniprot': {'query_status': 'ok', 'primary_accession': 'Q2HR82', 'uni_prot_id': 'KBZIP_HHV8P', 'entry_type': 'UniProtKB reviewed (Swiss-Prot)', 'taxid': 868565, 'organism_name': 'Human herpesvirus 8 type P (isolate GK18)', 'common_name': 'HHV-8', 'uniprot_lineage': [{'scientific_name': 'Viruses'}, {'scientific_name': 'Duplodnaviria'}, {'scientific_name': 'Heunggongvirae'}, {'scientific_name': 'P…
Q3KSP2	Q3KSP2	Herpes	Orthoherpesviridae (EBV)	likely EBV strain-specific protein	10376	Epstein-Barr virus (strain GD1)	{'query_status': 'ok', 'taxid': '10376', 'scientific_name': 'human gammaherpesvirus 4', 'rank': 'no rank', 'lineage': 'Viruses; Duplodnaviria; Heunggongvirae; Peploviricota; Herviviricetes; Herpesvirales; Orthoherpesviridae; Gammaherpesvirinae; Lymphocryptovirus; Lymphocryptovirus humangamma4', 'lineage_nodes': [{'taxid': '10239', 'scientific_name': 'Viruses', 'rank': 'acellular root'}, {'taxid':…	ok	{'uniprot': {'query_status': 'ok', 'primary_accession': 'Q3KSP2', 'uni_prot_id': 'Q3KSP2_EBVG', 'entry_type': 'UniProtKB unreviewed (TrEMBL)', 'taxid': 10376, 'organism_name': 'Epstein-Barr virus (strain GD1)', 'common_name': 'HHV-4', 'uniprot_lineage': [{'scientific_name': 'Viruses'}, {'scientific_name': 'Duplodnaviria'}, {'scientific_name': 'Heunggongvirae'}, {'scientific_name': 'Peploviricota'…
F5CGQ0	F5CGQ0	IAV	Orthomyxoviridae (Influenza A virus)	Influenza A virus NS1-like accession listed with reviewed PR8 NS1 set	997555	Influenza A virus	{'query_status': 'ok', 'taxid': '997555', 'scientific_name': 'Influenza A virus (A/reassortant/CDC2005712034(California/07/2004 x Puerto Rico/8/1934)(H3N2))', 'rank': 'no rank', 'lineage': 'Viruses; Riboviria; Orthornavirae; Negarnaviricota; Polyploviricotina; Insthoviricetes; Articulavirales; Orthomyxoviridae; Alphainfluenzavirus; Alphainfluenzavirus influenzae; Influenza A virus; H3N2 subtype',…	ok	{'uniprot': {'query_status': 'ok', 'primary_accession': 'F5CGQ0', 'uni_prot_id': 'F5CGQ0_9INFA', 'entry_type': 'UniProtKB unreviewed (TrEMBL)', 'taxid': 997555, 'organism_name': 'Influenza A virus', 'common_name': 'A/reassortant/CDC2005712034(California/07/2004 x Puerto Rico/8/1934)(H3N2)', 'uniprot_lineage': [{'scientific_name': 'Viruses'}, {'scientific_name': 'Riboviria'}, {'scientific_name': '…
O92551	O92551	IAV	Orthomyxoviridae (Influenza A virus)	Influenza A virus NS1 isoform entry	380337	Influenza A virus (strain A/Equine/Prague/1/1956 H7N7)	{'query_status': 'ok', 'taxid': '380337', 'scientific_name': 'Influenza A virus (A/equine/Prague/1/1956(H7N7))', 'rank': 'no rank', 'lineage': 'Viruses; Riboviria; Orthornavirae; Negarnaviricota; Polyploviricotina; Insthoviricetes; Articulavirales; Orthomyxoviridae; Alphainfluenzavirus; Alphainfluenzavirus influenzae; Influenza A virus; H7N7 subtype', 'lineage_nodes': [{'taxid': '10239', 'scienti…	ok	{'uniprot': {'query_status': 'ok', 'primary_accession': 'O92551', 'uni_prot_id': 'NS1_I56A3', 'entry_type': 'UniProtKB reviewed (Swiss-Prot)', 'taxid': 380337, 'organism_name': 'Influenza A virus (strain A/Equine/Prague/1/1956 H7N7)', 'common_name': None, 'uniprot_lineage': [{'scientific_name': 'Viruses'}, {'scientific_name': 'Riboviria'}, {'scientific_name': 'Orthornavirae'}, {'scientific_name':…
P03495	P03495	IAV	Orthomyxoviridae (Influenza A virus)	Influenza A virus NS1/non-structural protein 1	381517	Influenza A virus (strain A/Udorn/307/1972 H3N2)	{'query_status': 'ok', 'taxid': '381517', 'scientific_name': 'Influenza A virus (A/Udorn/307/1972(H3N2))', 'rank': 'no rank', 'lineage': 'Viruses; Riboviria; Orthornavirae; Negarnaviricota; Polyploviricotina; Insthoviricetes; Articulavirales; Orthomyxoviridae; Alphainfluenzavirus; Alphainfluenzavirus influenzae; Influenza A virus; H3N2 subtype', 'lineage_nodes': [{'taxid': '10239', 'scientific_na…	ok	{'uniprot': {'query_status': 'ok', 'primary_accession': 'P03495', 'uni_prot_id': 'NS1_I72A2', 'entry_type': 'UniProtKB reviewed (Swiss-Prot)', 'taxid': 381517, 'organism_name': 'Influenza A virus (strain A/Udorn/307/1972 H3N2)', 'common_name': None, 'uniprot_lineage': [{'scientific_name': 'Viruses'}, {'scientific_name': 'Riboviria'}, {'scientific_name': 'Orthornavirae'}, {'scientific_name': 'Nega…
P03496	P03496	IAV	Orthomyxoviridae (Influenza A virus)	Influenza A virus NS1/non-structural protein 1	211044	Influenza A virus (strain A/Puerto Rico/8/1934 H1N1)	{'query_status': 'error', 'taxid': '211044', 'error': '<urlopen error _ssl.c:1130: The handshake operation timed out>'}	partial_or_failed	{'uniprot': {'query_status': 'ok', 'primary_accession': 'P03496', 'uni_prot_id': 'NS1_I34A1', 'entry_type': 'UniProtKB reviewed (Swiss-Prot)', 'taxid': 211044, 'organism_name': 'Influenza A virus (strain A/Puerto Rico/8/1934 H1N1)', 'common_name': None, 'uniprot_lineage': [{'scientific_name': 'Viruses'}, {'scientific_name': 'Riboviria'}, {'scientific_name': 'Orthornavirae'}, {'scientific_name': '…
Q0A2H0	Q0A2H0	IAV	Orthomyxoviridae (Influenza A virus)	Influenza A virus NS1	402527	Influenza A virus (strain A/Chicken/Scotland/1959 H5N1)	{'query_status': 'ok', 'taxid': '402527', 'scientific_name': 'Influenza A virus (A/chicken/Scotland/1959(H5N1))', 'rank': 'no rank', 'lineage': 'Viruses; Riboviria; Orthornavirae; Negarnaviricota; Polyploviricotina; Insthoviricetes; Articulavirales; Orthomyxoviridae; Alphainfluenzavirus; Alphainfluenzavirus influenzae; Influenza A virus; H5N1 subtype', 'lineage_nodes': [{'taxid': '10239', 'scient…	ok	{'uniprot': {'query_status': 'ok', 'primary_accession': 'Q0A2H0', 'uni_prot_id': 'NS1_I59A0', 'entry_type': 'UniProtKB reviewed (Swiss-Prot)', 'taxid': 402527, 'organism_name': 'Influenza A virus (strain A/Chicken/Scotland/1959 H5N1)', 'common_name': None, 'uniprot_lineage': [{'scientific_name': 'Viruses'}, {'scientific_name': 'Riboviria'}, {'scientific_name': 'Orthornavirae'}, {'scientific_name'…
Q20MC8	Q20MC8	IAV	Orthomyxoviridae (Influenza A virus)	Influenza A virus protein	385599	Influenza A virus (strain A/Udorn/1972 H3N2)	{'query_status': 'ok', 'taxid': '385599', 'scientific_name': 'Influenza A virus (A/udorn/1972(H3N2))', 'rank': 'no rank', 'lineage': 'Viruses; Riboviria; Orthornavirae; Negarnaviricota; Polyploviricotina; Insthoviricetes; Articulavirales; Orthomyxoviridae; Alphainfluenzavirus; Alphainfluenzavirus influenzae; Influenza A virus; H3N2 subtype', 'lineage_nodes': [{'taxid': '10239', 'scientific_name':…	ok	{'uniprot': {'query_status': 'ok', 'primary_accession': 'Q20MC8', 'uni_prot_id': 'Q20MC8_I72A8', 'entry_type': 'UniProtKB unreviewed (TrEMBL)', 'taxid': 385599, 'organism_name': 'Influenza A virus (strain A/Udorn/1972 H3N2)', 'common_name': None, 'uniprot_lineage': [{'scientific_name': 'Viruses'}, {'scientific_name': 'Riboviria'}, {'scientific_name': 'Orthornavirae'}, {'scientific_name': 'Negarna…
Q20MD0	Q20MD0	IAV	Orthomyxoviridae (Influenza A virus)	Influenza A virus protein	385599	Influenza A virus (strain A/Udorn/1972 H3N2)	{'query_status': 'ok', 'taxid': '385599', 'scientific_name': 'Influenza A virus (A/udorn/1972(H3N2))', 'rank': 'no rank', 'lineage': 'Viruses; Riboviria; Orthornavirae; Negarnaviricota; Polyploviricotina; Insthoviricetes; Articulavirales; Orthomyxoviridae; Alphainfluenzavirus; Alphainfluenzavirus influenzae; Influenza A virus; H3N2 subtype', 'lineage_nodes': [{'taxid': '10239', 'scientific_name':…	ok	{'uniprot': {'query_status': 'ok', 'primary_accession': 'Q20MD0', 'uni_prot_id': 'Q20MD0_I72A8', 'entry_type': 'UniProtKB unreviewed (TrEMBL)', 'taxid': 385599, 'organism_name': 'Influenza A virus (strain A/Udorn/1972 H3N2)', 'common_name': None, 'uniprot_lineage': [{'scientific_name': 'Viruses'}, {'scientific_name': 'Riboviria'}, {'scientific_name': 'Orthornavirae'}, {'scientific_name': 'Negarna…
Q20MH3	Q20MH3	IAV	Orthomyxoviridae (Influenza A virus)	Influenza A virus protein	381518	Influenza A virus (strain A/Wilson-Smith/1933 H1N1)	{'query_status': 'ok', 'taxid': '381518', 'scientific_name': 'Influenza A virus (A/Wilson-Smith/1933(H1N1))', 'rank': 'no rank', 'lineage': 'Viruses; Riboviria; Orthornavirae; Negarnaviricota; Polyploviricotina; Insthoviricetes; Articulavirales; Orthomyxoviridae; Alphainfluenzavirus; Alphainfluenzavirus influenzae; Influenza A virus; H1N1 subtype', 'lineage_nodes': [{'taxid': '10239', 'scientific…	ok	{'uniprot': {'query_status': 'ok', 'primary_accession': 'Q20MH3', 'uni_prot_id': 'Q20MH3_I33A0', 'entry_type': 'UniProtKB unreviewed (TrEMBL)', 'taxid': 381518, 'organism_name': 'Influenza A virus (strain A/Wilson-Smith/1933 H1N1)', 'common_name': 'Influenza A virus (strain A/WS/1933 H1N1)', 'uniprot_lineage': [{'scientific_name': 'Viruses'}, {'scientific_name': 'Riboviria'}, {'scientific_name': …
Q2PJP0	Q2PJP0	IAV	Orthomyxoviridae (Influenza A virus)	Influenza A virus protein	363744	Influenza A virus	{'query_status': 'ok', 'taxid': '363744', 'scientific_name': 'Influenza A virus (A/chicken/Kurgan/3/2005(H5N1))', 'rank': 'no rank', 'lineage': 'Viruses; Riboviria; Orthornavirae; Negarnaviricota; Polyploviricotina; Insthoviricetes; Articulavirales; Orthomyxoviridae; Alphainfluenzavirus; Alphainfluenzavirus influenzae; Influenza A virus; H5N1 subtype', 'lineage_nodes': [{'taxid': '10239', 'scient…	ok	{'uniprot': {'query_status': 'ok', 'primary_accession': 'Q2PJP0', 'uni_prot_id': 'Q2PJP0_IH5N1', 'entry_type': 'UniProtKB unreviewed (TrEMBL)', 'taxid': 363744, 'organism_name': 'Influenza A virus', 'common_name': 'A/chicken/Kurgan/3/2005(H5N1)', 'uniprot_lineage': [{'scientific_name': 'Viruses'}, {'scientific_name': 'Riboviria'}, {'scientific_name': 'Orthornavirae'}, {'scientific_name': 'Negarna…
Q3SBS4	Q3SBS4	IAV	Orthomyxoviridae (Influenza A virus)	Influenza A virus protein	329599	Influenza A virus	{'query_status': 'ok', 'taxid': '329599', 'scientific_name': 'Influenza A virus (A/chicken/Guangdong/6/97(H9N2))', 'rank': 'no rank', 'lineage': 'Viruses; Riboviria; Orthornavirae; Negarnaviricota; Polyploviricotina; Insthoviricetes; Articulavirales; Orthomyxoviridae; Alphainfluenzavirus; Alphainfluenzavirus influenzae; Influenza A virus; H9N2 subtype', 'lineage_nodes': [{'taxid': '10239', 'scien…	ok	{'uniprot': {'query_status': 'ok', 'primary_accession': 'Q3SBS4', 'uni_prot_id': 'Q3SBS4_9INFA', 'entry_type': 'UniProtKB unreviewed (TrEMBL)', 'taxid': 329599, 'organism_name': 'Influenza A virus', 'common_name': 'A/chicken/Guangdong/6/97(H9N2)', 'uniprot_lineage': [{'scientific_name': 'Viruses'}, {'scientific_name': 'Riboviria'}, {'scientific_name': 'Orthornavirae'}, {'scientific_name': 'Negarn…
Q6DP93	Q6DP93	IAV	Orthomyxoviridae (Influenza A virus)	Influenza A virus NS1	644788	Influenza A virus	{'query_status': 'ok', 'taxid': '644788', 'scientific_name': 'Influenza A virus (A/Vietnam/1194/2004(H5N1))', 'rank': 'no rank', 'lineage': 'Viruses; Riboviria; Orthornavirae; Negarnaviricota; Polyploviricotina; Insthoviricetes; Articulavirales; Orthomyxoviridae; Alphainfluenzavirus; Alphainfluenzavirus influenzae; Influenza A virus; H5N1 subtype', 'lineage_nodes': [{'taxid': '10239', 'scientific…	ok	{'uniprot': {'query_status': 'ok', 'primary_accession': 'Q6DP93', 'uni_prot_id': 'Q6DP93_IH5N1', 'entry_type': 'UniProtKB unreviewed (TrEMBL)', 'taxid': 644788, 'organism_name': 'Influenza A virus', 'common_name': 'A/Vietnam/1194/2004(H5N1)', 'uniprot_lineage': [{'scientific_name': 'Viruses'}, {'scientific_name': 'Riboviria'}, {'scientific_name': 'Orthornavirae'}, {'scientific_name': 'Negarnaviri…
Q6QT26	Q6QT26	IAV	Orthomyxoviridae (Influenza A virus)	Influenza A virus NS1	261268	Influenza A virus	{'query_status': 'ok', 'taxid': '261268', 'scientific_name': 'Influenza A virus (A/Vietnam/1196/2004(H5N1))', 'rank': 'no rank', 'lineage': 'Viruses; Riboviria; Orthornavirae; Negarnaviricota; Polyploviricotina; Insthoviricetes; Articulavirales; Orthomyxoviridae; Alphainfluenzavirus; Alphainfluenzavirus influenzae; Influenza A virus; H5N1 subtype', 'lineage_nodes': [{'taxid': '10239', 'scientific…	ok	{'uniprot': {'query_status': 'ok', 'primary_accession': 'Q6QT26', 'uni_prot_id': 'Q6QT26_IH5N1', 'entry_type': 'UniProtKB unreviewed (TrEMBL)', 'taxid': 261268, 'organism_name': 'Influenza A virus', 'common_name': 'A/Vietnam/1196/2004(H5N1)', 'uniprot_lineage': [{'scientific_name': 'Viruses'}, {'scientific_name': 'Riboviria'}, {'scientific_name': 'Orthornavirae'}, {'scientific_name': 'Negarnaviri…
Q6VE52	Q6VE52	IAV	Orthomyxoviridae (Influenza A virus)	Influenza A virus protein	251307	Influenza A virus	{'query_status': 'ok', 'taxid': '251307', 'scientific_name': 'Influenza A virus (A/chicken/Netherlands/1/03(H7N7))', 'rank': 'no rank', 'lineage': 'Viruses; Riboviria; Orthornavirae; Negarnaviricota; Polyploviricotina; Insthoviricetes; Articulavirales; Orthomyxoviridae; Alphainfluenzavirus; Alphainfluenzavirus influenzae; Influenza A virus; H7N7 subtype', 'lineage_nodes': [{'taxid': '10239', 'sci…	ok	{'uniprot': {'query_status': 'ok', 'primary_accession': 'Q6VE52', 'uni_prot_id': 'Q6VE52_9INFA', 'entry_type': 'UniProtKB unreviewed (TrEMBL)', 'taxid': 251307, 'organism_name': 'Influenza A virus', 'common_name': 'A/chicken/Netherlands/1/03(H7N7)', 'uniprot_lineage': [{'scientific_name': 'Viruses'}, {'scientific_name': 'Riboviria'}, {'scientific_name': 'Orthornavirae'}, {'scientific_name': 'Nega…
Q8JSN8	Q8JSN8	IAV	Orthomyxoviridae (Influenza A virus)	Influenza A virus protein	158611	Influenza A virus	{'query_status': 'ok', 'taxid': '158611', 'scientific_name': 'Influenza A virus (A/Paris/908/97(H3N2))', 'rank': 'no rank', 'lineage': 'Viruses; Riboviria; Orthornavirae; Negarnaviricota; Polyploviricotina; Insthoviricetes; Articulavirales; Orthomyxoviridae; Alphainfluenzavirus; Alphainfluenzavirus influenzae; Influenza A virus; H3N2 subtype', 'lineage_nodes': [{'taxid': '10239', 'scientific_name…	ok	{'uniprot': {'query_status': 'ok', 'primary_accession': 'Q8JSN8', 'uni_prot_id': 'Q8JSN8_9INFA', 'entry_type': 'UniProtKB unreviewed (TrEMBL)', 'taxid': 158611, 'organism_name': 'Influenza A virus', 'common_name': 'A/Paris/908/97(H3N2)', 'uniprot_lineage': [{'scientific_name': 'Viruses'}, {'scientific_name': 'Riboviria'}, {'scientific_name': 'Orthornavirae'}, {'scientific_name': 'Negarnaviricota'…
P03081	P03081	Others	Polyomaviridae (SV40)	SV40 protein	1891767	Simian virus 40	{'query_status': 'ok', 'taxid': '1891767', 'scientific_name': 'Betapolyomavirus macacae', 'rank': 'species', 'lineage': 'Viruses; Monodnaviria; Shotokuvirae; Cossaviricota; Papovaviricetes; Sepolyvirales; Polyomaviridae; Betapolyomavirus', 'lineage_nodes': [{'taxid': '10239', 'scientific_name': 'Viruses', 'rank': 'acellular root'}, {'taxid': '2731342', 'scientific_name': 'Monodnaviria', 'rank': '…	ok	{'uniprot': {'query_status': 'ok', 'primary_accession': 'P03081', 'uni_prot_id': 'ST_SV40', 'entry_type': 'UniProtKB reviewed (Swiss-Prot)', 'taxid': 1891767, 'organism_name': 'Simian virus 40', 'common_name': 'SV40', 'uniprot_lineage': [{'scientific_name': 'Viruses'}, {'scientific_name': 'Monodnaviria'}, {'scientific_name': 'Shotokuvirae'}, {'scientific_name': 'Cossaviricota'}, {'scientific_name…
Q3ZK64	Q3ZK64	Others	Sedoreoviridae (Rotavirus A)	rotavirus NSP4	578843	Rotavirus A (isolate RVA/Human/Belgium/B4106/2000/G3P11[14])	{'query_status': 'ok', 'taxid': '578843', 'scientific_name': 'Rotavirus A human/BEL/4106/2000 G3P11[14]', 'rank': 'no rank', 'lineage': 'Viruses; Riboviria; Orthornavirae; Duplornaviricota; Resentoviricetes; Reovirales; Sedoreoviridae; Rotavirus; Rotavirus alphagastroenteritidis; Rotavirus A; Rotavirus G3', 'lineage_nodes': [{'taxid': '10239', 'scientific_name': 'Viruses', 'rank': 'acellular root…	ok	{'uniprot': {'query_status': 'ok', 'primary_accession': 'Q3ZK64', 'uni_prot_id': 'NSP4_ROT41', 'entry_type': 'UniProtKB reviewed (Swiss-Prot)', 'taxid': 578843, 'organism_name': 'Rotavirus A (isolate RVA/Human/Belgium/B4106/2000/G3P11[14])', 'common_name': 'RV-A', 'uniprot_lineage': [{'scientific_name': 'Viruses'}, {'scientific_name': 'Riboviria'}, {'scientific_name': 'Orthornavirae'}, {'scientif…
Q9DLD6	Q9DLD6	Others	Paramyxoviridae / avian orthoavulavirus-like	Newcastle disease virus protein	652953	Newcastle disease virus (strain Chicken/United States/B1/48)	{'query_status': 'ok', 'taxid': '652953', 'scientific_name': 'Newcastle disease virus B1/48', 'rank': 'no rank', 'lineage': 'Viruses; Riboviria; Orthornavirae; Negarnaviricota; Haploviricotina; Monjiviricetes; Mononegavirales; Paramyxoviridae; Avulavirinae; Orthoavulavirus; Orthoavulavirus javaense; avian paramyxovirus 1', 'lineage_nodes': [{'taxid': '10239', 'scientific_name': 'Viruses', 'rank':…	ok	{'uniprot': {'query_status': 'ok', 'primary_accession': 'Q9DLD6', 'uni_prot_id': 'PHOSP_NDVB1', 'entry_type': 'UniProtKB reviewed (Swiss-Prot)', 'taxid': 652953, 'organism_name': 'Newcastle disease virus (strain Chicken/United States/B1/48)', 'common_name': 'NDV', 'uniprot_lineage': [{'scientific_name': 'Viruses'}, {'scientific_name': 'Riboviria'}, {'scientific_name': 'Orthornavirae'}, {'scientif…
P04305	P04305	Pox	Poxviridae (Vaccinia virus)	vaccinia virus protein	10254	Vaccinia virus (strain Western Reserve)	{'query_status': 'ok', 'taxid': '10254', 'scientific_name': 'Vaccinia virus WR', 'rank': 'no rank', 'lineage': 'Viruses; Varidnaviria; Bamfordvirae; Nucleocytoviricota; Pokkesviricetes; Chitovirales; Poxviridae; Chordopoxvirinae; Orthopoxvirus; Orthopoxvirus vaccinia', 'lineage_nodes': [{'taxid': '10239', 'scientific_name': 'Viruses', 'rank': 'acellular root'}, {'taxid': '2732004', 'scientific_na…	ok	{'uniprot': {'query_status': 'ok', 'primary_accession': 'P04305', 'uni_prot_id': 'PG117_VACCW', 'entry_type': 'UniProtKB reviewed (Swiss-Prot)', 'taxid': 10254, 'organism_name': 'Vaccinia virus (strain Western Reserve)', 'common_name': 'VACV', 'uniprot_lineage': [{'scientific_name': 'Viruses'}, {'scientific_name': 'Varidnaviria'}, {'scientific_name': 'Bamfordvirae'}, {'scientific_name': 'Nucleocy…
P14357	P14357	Pox	Poxviridae (Vaccinia virus)	vaccinia virus protein	10254	Vaccinia virus (strain Western Reserve)	{'query_status': 'ok', 'taxid': '10254', 'scientific_name': 'Vaccinia virus WR', 'rank': 'no rank', 'lineage': 'Viruses; Varidnaviria; Bamfordvirae; Nucleocytoviricota; Pokkesviricetes; Chitovirales; Poxviridae; Chordopoxvirinae; Orthopoxvirus; Orthopoxvirus vaccinia', 'lineage_nodes': [{'taxid': '10239', 'scientific_name': 'Viruses', 'rank': 'acellular root'}, {'taxid': '2732004', 'scientific_na…	ok	{'uniprot': {'query_status': 'ok', 'primary_accession': 'P14357', 'uni_prot_id': 'PG036_VACCW', 'entry_type': 'UniProtKB reviewed (Swiss-Prot)', 'taxid': 10254, 'organism_name': 'Vaccinia virus (strain Western Reserve)', 'common_name': 'VACV', 'uniprot_lineage': [{'scientific_name': 'Viruses'}, {'scientific_name': 'Varidnaviria'}, {'scientific_name': 'Bamfordvirae'}, {'scientific_name': 'Nucleocy…
P68600	P68600	Pox	Poxviridae (Vaccinia virus)	vaccinia virus protein	10254	Vaccinia virus (strain Western Reserve)	{'query_status': 'ok', 'taxid': '10254', 'scientific_name': 'Vaccinia virus WR', 'rank': 'no rank', 'lineage': 'Viruses; Varidnaviria; Bamfordvirae; Nucleocytoviricota; Pokkesviricetes; Chitovirales; Poxviridae; Chordopoxvirinae; Orthopoxvirus; Orthopoxvirus vaccinia', 'lineage_nodes': [{'taxid': '10239', 'scientific_name': 'Viruses', 'rank': 'acellular root'}, {'taxid': '2732004', 'scientific_na…	ok	{'uniprot': {'query_status': 'ok', 'primary_accession': 'P68600', 'uni_prot_id': 'PG027_VACCW', 'entry_type': 'UniProtKB reviewed (Swiss-Prot)', 'taxid': 10254, 'organism_name': 'Vaccinia virus (strain Western Reserve)', 'common_name': 'VACV', 'uniprot_lineage': [{'scientific_name': 'Viruses'}, {'scientific_name': 'Varidnaviria'}, {'scientific_name': 'Bamfordvirae'}, {'scientific_name': 'Nucleocy…
Q8UYL3	Q8UYL3	Pox	Poxviridae (Vaccinia-like)	likely poxvirus protein	10245	Vaccinia virus	{'query_status': 'ok', 'taxid': '10245', 'scientific_name': 'Orthopoxvirus vaccinia', 'rank': 'species', 'lineage': 'Viruses; Varidnaviria; Bamfordvirae; Nucleocytoviricota; Pokkesviricetes; Chitovirales; Poxviridae; Chordopoxvirinae; Orthopoxvirus', 'lineage_nodes': [{'taxid': '10239', 'scientific_name': 'Viruses', 'rank': 'acellular root'}, {'taxid': '2732004', 'scientific_name': 'Varidnaviria'…	ok	{'uniprot': {'query_status': 'ok', 'primary_accession': 'Q8UYL3', 'uni_prot_id': 'Q8UYL3_VACCV', 'entry_type': 'UniProtKB unreviewed (TrEMBL)', 'taxid': 10245, 'organism_name': 'Vaccinia virus', 'common_name': 'VACV', 'uniprot_lineage': [{'scientific_name': 'Viruses'}, {'scientific_name': 'Varidnaviria'}, {'scientific_name': 'Bamfordvirae'}, {'scientific_name': 'Nucleocytoviricota'}, {'scientific…
Q98184	Q98184	Pox	Poxviridae (Molluscum contagiosum virus)	molluscum contagiosum virus protein	10280	Molluscum contagiosum virus subtype 1	{'query_status': 'ok', 'taxid': '10280', 'scientific_name': 'Molluscum contagiosum virus subtype 1', 'rank': 'no rank', 'lineage': 'Viruses; Varidnaviria; Bamfordvirae; Nucleocytoviricota; Pokkesviricetes; Chitovirales; Poxviridae; Chordopoxvirinae; Molluscipoxvirus; Molluscipoxvirus molluscum; Molluscum contagiosum virus', 'lineage_nodes': [{'taxid': '10239', 'scientific_name': 'Viruses', 'rank'…	ok	{'uniprot': {'query_status': 'ok', 'primary_accession': 'Q98184', 'uni_prot_id': 'Q98184_MCV1', 'entry_type': 'UniProtKB unreviewed (TrEMBL)', 'taxid': 10280, 'organism_name': 'Molluscum contagiosum virus subtype 1', 'common_name': 'MOCV', 'uniprot_lineage': [{'scientific_name': 'Viruses'}, {'scientific_name': 'Varidnaviria'}, {'scientific_name': 'Bamfordvirae'}, {'scientific_name': 'Nucleocytovi…
P03383	P03383	Retro_other	Retroviridae (HTLV-2)	HTLV-2 envelope protein	11909	Human T-cell leukemia virus 2	{'query_status': 'ok', 'taxid': '11909', 'scientific_name': 'Human T-lymphotropic virus 2', 'rank': 'no rank', 'lineage': 'Viruses; Riboviria; Pararnavirae; Artverviricota; Revtraviricetes; Ortervirales; Retroviridae; Orthoretrovirinae; Deltaretrovirus; Deltaretrovirus priTlym2; Primate T-lymphotropic virus 2', 'lineage_nodes': [{'taxid': '10239', 'scientific_name': 'Viruses', 'rank': 'acellular …	ok	{'uniprot': {'query_status': 'ok', 'primary_accession': 'P03383', 'uni_prot_id': 'ENV_HTLV2', 'entry_type': 'UniProtKB reviewed (Swiss-Prot)', 'taxid': 11909, 'organism_name': 'Human T-cell leukemia virus 2', 'common_name': 'HTLV-2', 'uniprot_lineage': [{'scientific_name': 'Viruses'}, {'scientific_name': 'Riboviria'}, {'scientific_name': 'Pararnavirae'}, {'scientific_name': 'Artverviricota'}, {'s…
P14075	P14075	Retro_other	Retroviridae (HTLV-1)	HTLV-1 envelope protein	11927	Human T-cell leukemia virus 1 (isolate Caribbea HS-35 subtype A)	{'query_status': 'ok', 'taxid': '11927', 'scientific_name': 'Human T-cell lymphotrophic virus type 1 (Caribbean isolate)', 'rank': 'no rank', 'lineage': 'Viruses; Riboviria; Pararnavirae; Artverviricota; Revtraviricetes; Ortervirales; Retroviridae; Orthoretrovirinae; Deltaretrovirus; Deltaretrovirus priTlym1; Primate T-lymphotropic virus 1; Human T-cell leukemia virus type I; HTLV-1 subtype A', '…	ok	{'uniprot': {'query_status': 'ok', 'primary_accession': 'P14075', 'uni_prot_id': 'ENV_HTL1C', 'entry_type': 'UniProtKB reviewed (Swiss-Prot)', 'taxid': 11927, 'organism_name': 'Human T-cell leukemia virus 1 (isolate Caribbea HS-35 subtype A)', 'common_name': 'HTLV-1', 'uniprot_lineage': [{'scientific_name': 'Viruses'}, {'scientific_name': 'Riboviria'}, {'scientific_name': 'Pararnavirae'}, {'scien…
P0C6U8-PRO_0000338257	P0C6U8	SARS-CoV	Coronaviridae (SARS-CoV)	SARS-CoV mature product from replicase polyprotein	694009	Severe acute respiratory syndrome coronavirus	{'query_status': 'ok', 'taxid': '694009', 'scientific_name': 'Severe acute respiratory syndrome-related coronavirus', 'rank': 'no rank', 'lineage': 'Viruses; Riboviria; Orthornavirae; Pisuviricota; Pisoniviricetes; Nidovirales; Cornidovirineae; Coronaviridae; Orthocoronavirinae; Betacoronavirus; Sarbecovirus; Betacoronavirus pandemicum', 'lineage_nodes': [{'taxid': '10239', 'scientific_name': 'Vi…	ok	{'uniprot': {'query_status': 'ok', 'primary_accession': 'P0C6U8', 'uni_prot_id': 'R1A_SARS', 'entry_type': 'UniProtKB reviewed (Swiss-Prot)', 'taxid': 694009, 'organism_name': 'Severe acute respiratory syndrome coronavirus', 'common_name': 'SARS-CoV', 'uniprot_lineage': [{'scientific_name': 'Viruses'}, {'scientific_name': 'Riboviria'}, {'scientific_name': 'Orthornavirae'}, {'scientific_name': 'Pi…
P0C6X7-PRO_0000037311	P0C6X7	SARS-CoV	Coronaviridae (SARS-CoV)	SARS-CoV mature product from replicase polyprotein	694009	Severe acute respiratory syndrome coronavirus	{'query_status': 'ok', 'taxid': '694009', 'scientific_name': 'Severe acute respiratory syndrome-related coronavirus', 'rank': 'no rank', 'lineage': 'Viruses; Riboviria; Orthornavirae; Pisuviricota; Pisoniviricetes; Nidovirales; Cornidovirineae; Coronaviridae; Orthocoronavirinae; Betacoronavirus; Sarbecovirus; Betacoronavirus pandemicum', 'lineage_nodes': [{'taxid': '10239', 'scientific_name': 'Vi…	ok	{'uniprot': {'query_status': 'ok', 'primary_accession': 'P0C6X7', 'uni_prot_id': 'R1AB_SARS', 'entry_type': 'UniProtKB reviewed (Swiss-Prot)', 'taxid': 694009, 'organism_name': 'Severe acute respiratory syndrome coronavirus', 'common_name': 'SARS-CoV', 'uniprot_lineage': [{'scientific_name': 'Viruses'}, {'scientific_name': 'Riboviria'}, {'scientific_name': 'Orthornavirae'}, {'scientific_name': 'P…
P0DTC9	P0DTC9	SARS-CoV	Coronaviridae (SARS-CoV-2)	SARS-CoV-2 nucleoprotein	2697049	Severe acute respiratory syndrome coronavirus 2	{'query_status': 'ok', 'taxid': '2697049', 'scientific_name': 'Severe acute respiratory syndrome coronavirus 2', 'rank': 'no rank', 'lineage': 'Viruses; Riboviria; Orthornavirae; Pisuviricota; Pisoniviricetes; Nidovirales; Cornidovirineae; Coronaviridae; Orthocoronavirinae; Betacoronavirus; Sarbecovirus; Betacoronavirus pandemicum', 'lineage_nodes': [{'taxid': '10239', 'scientific_name': 'Viruses…	ok	{'uniprot': {'query_status': 'ok', 'primary_accession': 'P0DTC9', 'uni_prot_id': 'NCAP_SARS2', 'entry_type': 'UniProtKB reviewed (Swiss-Prot)', 'taxid': 2697049, 'organism_name': 'Severe acute respiratory syndrome coronavirus 2', 'common_name': '2019-nCoV', 'uniprot_lineage': [{'scientific_name': 'Viruses'}, {'scientific_name': 'Riboviria'}, {'scientific_name': 'Orthornavirae'}, {'scientific_name…
P0DTD1-PRO_0000449633	P0DTD1	SARS-CoV	Coronaviridae (SARS-CoV-2)	SARS-CoV-2 mature product from replicase polyprotein 1ab	2697049	Severe acute respiratory syndrome coronavirus 2	{'query_status': 'ok', 'taxid': '2697049', 'scientific_name': 'Severe acute respiratory syndrome coronavirus 2', 'rank': 'no rank', 'lineage': 'Viruses; Riboviria; Orthornavirae; Pisuviricota; Pisoniviricetes; Nidovirales; Cornidovirineae; Coronaviridae; Orthocoronavirinae; Betacoronavirus; Sarbecovirus; Betacoronavirus pandemicum', 'lineage_nodes': [{'taxid': '10239', 'scientific_name': 'Viruses…	ok	{'uniprot': {'query_status': 'ok', 'primary_accession': 'P0DTD1', 'uni_prot_id': 'R1AB_SARS2', 'entry_type': 'UniProtKB reviewed (Swiss-Prot)', 'taxid': 2697049, 'organism_name': 'Severe acute respiratory syndrome coronavirus 2', 'common_name': '2019-nCoV', 'uniprot_lineage': [{'scientific_name': 'Viruses'}, {'scientific_name': 'Riboviria'}, {'scientific_name': 'Orthornavirae'}, {'scientific_name…
P0DTD2	P0DTD2	SARS-CoV	Coronaviridae (SARS-CoV-2)	SARS-CoV-2 ORF9b protein	2697049	Severe acute respiratory syndrome coronavirus 2	{'query_status': 'ok', 'taxid': '2697049', 'scientific_name': 'Severe acute respiratory syndrome coronavirus 2', 'rank': 'no rank', 'lineage': 'Viruses; Riboviria; Orthornavirae; Pisuviricota; Pisoniviricetes; Nidovirales; Cornidovirineae; Coronaviridae; Orthocoronavirinae; Betacoronavirus; Sarbecovirus; Betacoronavirus pandemicum', 'lineage_nodes': [{'taxid': '10239', 'scientific_name': 'Viruses…	ok	{'uniprot': {'query_status': 'ok', 'primary_accession': 'P0DTD2', 'uni_prot_id': 'ORF9B_SARS2', 'entry_type': 'UniProtKB reviewed (Swiss-Prot)', 'taxid': 2697049, 'organism_name': 'Severe acute respiratory syndrome coronavirus 2', 'common_name': '2019-nCoV', 'uniprot_lineage': [{'scientific_name': 'Viruses'}, {'scientific_name': 'Riboviria'}, {'scientific_name': 'Orthornavirae'}, {'scientific_nam…
P0DTD3	P0DTD3	SARS-CoV	Coronaviridae (SARS-CoV-2)	SARS-CoV-2 ORF10 protein	2697049	Severe acute respiratory syndrome coronavirus 2	{'query_status': 'ok', 'taxid': '2697049', 'scientific_name': 'Severe acute respiratory syndrome coronavirus 2', 'rank': 'no rank', 'lineage': 'Viruses; Riboviria; Orthornavirae; Pisuviricota; Pisoniviricetes; Nidovirales; Cornidovirineae; Coronaviridae; Orthocoronavirinae; Betacoronavirus; Sarbecovirus; Betacoronavirus pandemicum', 'lineage_nodes': [{'taxid': '10239', 'scientific_name': 'Viruses…	ok	{'uniprot': {'query_status': 'ok', 'primary_accession': 'P0DTD3', 'uni_prot_id': 'ORF9C_SARS2', 'entry_type': 'UniProtKB reviewed (Swiss-Prot)', 'taxid': 2697049, 'organism_name': 'Severe acute respiratory syndrome coronavirus 2', 'common_name': '2019-nCoV', 'uniprot_lineage': [{'scientific_name': 'Viruses'}, {'scientific_name': 'Riboviria'}, {'scientific_name': 'Orthornavirae'}, {'scientific_nam…
P59595	P59595	SARS-CoV	Coronaviridae (SARS-CoV)	SARS-CoV nucleocapsid protein	694009	Severe acute respiratory syndrome coronavirus	{'query_status': 'ok', 'taxid': '694009', 'scientific_name': 'Severe acute respiratory syndrome-related coronavirus', 'rank': 'no rank', 'lineage': 'Viruses; Riboviria; Orthornavirae; Pisuviricota; Pisoniviricetes; Nidovirales; Cornidovirineae; Coronaviridae; Orthocoronavirinae; Betacoronavirus; Sarbecovirus; Betacoronavirus pandemicum', 'lineage_nodes': [{'taxid': '10239', 'scientific_name': 'Vi…	ok	{'uniprot': {'query_status': 'ok', 'primary_accession': 'P59595', 'uni_prot_id': 'NCAP_SARS', 'entry_type': 'UniProtKB reviewed (Swiss-Prot)', 'taxid': 694009, 'organism_name': 'Severe acute respiratory syndrome coronavirus', 'common_name': 'SARS-CoV', 'uniprot_lineage': [{'scientific_name': 'Viruses'}, {'scientific_name': 'Riboviria'}, {'scientific_name': 'Orthornavirae'}, {'scientific_name': 'P…
P59634	P59634	SARS-CoV	Coronaviridae	SARS-related coronavirus protein	694009	Severe acute respiratory syndrome coronavirus	{'query_status': 'ok', 'taxid': '694009', 'scientific_name': 'Severe acute respiratory syndrome-related coronavirus', 'rank': 'no rank', 'lineage': 'Viruses; Riboviria; Orthornavirae; Pisuviricota; Pisoniviricetes; Nidovirales; Cornidovirineae; Coronaviridae; Orthocoronavirinae; Betacoronavirus; Sarbecovirus; Betacoronavirus pandemicum', 'lineage_nodes': [{'taxid': '10239', 'scientific_name': 'Vi…	ok	{'uniprot': {'query_status': 'ok', 'primary_accession': 'P59634', 'uni_prot_id': 'NS6_SARS', 'entry_type': 'UniProtKB reviewed (Swiss-Prot)', 'taxid': 694009, 'organism_name': 'Severe acute respiratory syndrome coronavirus', 'common_name': 'SARS-CoV', 'uniprot_lineage': [{'scientific_name': 'Viruses'}, {'scientific_name': 'Riboviria'}, {'scientific_name': 'Orthornavirae'}, {'scientific_name': 'Pi…
P59636	P59636	SARS-CoV	Coronaviridae (SARS-CoV)	SARS-CoV accessory protein	694009	Severe acute respiratory syndrome coronavirus	{'query_status': 'ok', 'taxid': '694009', 'scientific_name': 'Severe acute respiratory syndrome-related coronavirus', 'rank': 'no rank', 'lineage': 'Viruses; Riboviria; Orthornavirae; Pisuviricota; Pisoniviricetes; Nidovirales; Cornidovirineae; Coronaviridae; Orthocoronavirinae; Betacoronavirus; Sarbecovirus; Betacoronavirus pandemicum', 'lineage_nodes': [{'taxid': '10239', 'scientific_name': 'Vi…	ok	{'uniprot': {'query_status': 'ok', 'primary_accession': 'P59636', 'uni_prot_id': 'ORF9B_SARS', 'entry_type': 'UniProtKB reviewed (Swiss-Prot)', 'taxid': 694009, 'organism_name': 'Severe acute respiratory syndrome coronavirus', 'common_name': 'SARS-CoV', 'uniprot_lineage': [{'scientific_name': 'Viruses'}, {'scientific_name': 'Riboviria'}, {'scientific_name': 'Orthornavirae'}, {'scientific_name': '…
Q80H93	Q80H93	SARS-CoV	Coronaviridae (SARS-CoV)	SARS-CoV ORF8b protein	694009	Severe acute respiratory syndrome coronavirus	{'query_status': 'ok', 'taxid': '694009', 'scientific_name': 'Severe acute respiratory syndrome-related coronavirus', 'rank': 'no rank', 'lineage': 'Viruses; Riboviria; Orthornavirae; Pisuviricota; Pisoniviricetes; Nidovirales; Cornidovirineae; Coronaviridae; Orthocoronavirinae; Betacoronavirus; Sarbecovirus; Betacoronavirus pandemicum', 'lineage_nodes': [{'taxid': '10239', 'scientific_name': 'Vi…	ok	{'uniprot': {'query_status': 'ok', 'primary_accession': 'Q80H93', 'uni_prot_id': 'NS8B_SARS', 'entry_type': 'UniProtKB reviewed (Swiss-Prot)', 'taxid': 694009, 'organism_name': 'Severe acute respiratory syndrome coronavirus', 'common_name': 'SARS-CoV', 'uniprot_lineage': [{'scientific_name': 'Viruses'}, {'scientific_name': 'Riboviria'}, {'scientific_name': 'Orthornavirae'}, {'scientific_name': 'P…
D3JIT9	D3JIT9	Others	Adenoviridae (human adenovirus)	exact accession not confidently resolved; may be pox-like	10528	Human adenovirus A serotype 18	{'query_status': 'ok', 'taxid': '10528', 'scientific_name': 'Human adenovirus 18', 'rank': 'no rank', 'lineage': 'Viruses; Varidnaviria; Bamfordvirae; Preplasmiviricota; Polisuviricotina; Pharingeaviricetes; Rowavirales; Adenoviridae; Mastadenovirus; Mastadenovirus adami; Human mastadenovirus A', 'lineage_nodes': [{'taxid': '10239', 'scientific_name': 'Viruses', 'rank': 'acellular root'}, {'taxid…	ok	{'uniprot': {'query_status': 'ok', 'primary_accession': 'D3JIT9', 'uni_prot_id': 'D3JIT9_ADE18', 'entry_type': 'UniProtKB unreviewed (TrEMBL)', 'taxid': 10528, 'organism_name': 'Human adenovirus A serotype 18', 'common_name': 'HAdV-18', 'uniprot_lineage': [{'scientific_name': 'Viruses'}, {'scientific_name': 'Varidnaviria'}, {'scientific_name': 'Bamfordvirae'}, {'scientific_name': 'Preplasmivirico…	Unresolved	Unresolved	unknown	reclassified	taxonomy is adenovirus-like and fits the existing catch-all Others bin
Q30NB4	Q30NB4	IAV	Orthomyxoviridae (Influenza A virus)	exact accession not confidently resolved; may be a typo/legacy accession	335361	Influenza A virus	{'query_status': 'ok', 'taxid': '335361', 'scientific_name': 'Influenza A virus (A/New York/238/2005(H3N2))', 'rank': 'no rank', 'lineage': 'Viruses; Riboviria; Orthornavirae; Negarnaviricota; Polyploviricotina; Insthoviricetes; Articulavirales; Orthomyxoviridae; Alphainfluenzavirus; Alphainfluenzavirus influenzae; Influenza A virus; H3N2 subtype', 'lineage_nodes': [{'taxid': '10239', 'scientific…	ok	{'uniprot': {'query_status': 'ok', 'primary_accession': 'Q30NB4', 'uni_prot_id': 'Q30NB4_9INFA', 'entry_type': 'UniProtKB unreviewed (TrEMBL)', 'taxid': 335361, 'organism_name': 'Influenza A virus', 'common_name': 'A/New York/238/2005(H3N2)', 'uniprot_lineage': [{'scientific_name': 'Viruses'}, {'scientific_name': 'Riboviria'}, {'scientific_name': 'Orthornavirae'}, {'scientific_name': 'Negarnaviri…	Unresolved	Unresolved	unknown	reclassified	taxonomy matches existing IAV records
Q98822	Q98822	Others	Adenoviridae (human adenovirus)	exact accession not confidently resolved	10524	Human adenovirus F serotype 41	{'query_status': 'ok', 'taxid': '10524', 'scientific_name': 'Human adenovirus 41', 'rank': 'no rank', 'lineage': 'Viruses; Varidnaviria; Bamfordvirae; Preplasmiviricota; Polisuviricotina; Pharingeaviricetes; Rowavirales; Adenoviridae; Mastadenovirus; Mastadenovirus faecale; Human mastadenovirus F', 'lineage_nodes': [{'taxid': '10239', 'scientific_name': 'Viruses', 'rank': 'acellular root'}, {'tax…	ok	{'uniprot': {'query_status': 'ok', 'primary_accession': 'Q98822', 'uni_prot_id': 'Q98822_ADE41', 'entry_type': 'UniProtKB unreviewed (TrEMBL)', 'taxid': 10524, 'organism_name': 'Human adenovirus F serotype 41', 'common_name': 'HAdV-41', 'uniprot_lineage': [{'scientific_name': 'Viruses'}, {'scientific_name': 'Varidnaviria'}, {'scientific_name': 'Bamfordvirae'}, {'scientific_name': 'Preplasmivirico…	Unresolved	Unresolved	unknown	reclassified	taxonomy is adenovirus-like and fits the existing catch-all Others bin

## Sheet: Extended Data Table 3
Bait	Preys	Virus_name	pred_prob	BioGRID_High_Evidence	BioGRID_Low_Evidence	BioGRID_Total_Evidence	BioGRID_PubMed_IDs	human_gene_name	group
nsp7	P61006	SARS_CoV_1	0.848972	1	0	1	33060197	RAB8A	Low-evidence
orf10	Q15370	SARS_CoV_2	0.801936	2	1	3	32353859;33060197;33827988	ELOB	High-evidence
nsp7	Q8IUR0	SARS_CoV_1	0.770465	1	0	1	33060197	TRAPPC5	Low-evidence
orf6	P78406	SARS_CoV_1	0.720172	1	6	7	33060197;33849972;35096974;35970938	RAE1	High-evidence
nsp9	P13984	SARS_CoV_2	0.713032	7	0	7	32353859;32838362;33060197;33845483;34597346;888800000082;888800000817	GTF2F2	Medium-evidence
nsp7	Q9BQE4	SARS_CoV_2	0.700075	3	2	5	32353859;33060197;36217030;36773692	SELENOS	High-evidence
nsp7	P61006	SARS_CoV_2	0.698432	6	0	6	32353859;33060197;33080218;34709727;36217030;40593736	RAB8A	Medium-evidence
nsp7	Q9BQE4	SARS_CoV_1	0.695958	1	0	1	33060197	SELENOS	Low-evidence
nsp7	Q9H7Z7	SARS_CoV_2	0.690142	4	1	5	32353859;33060197;36217030;37483225;39147351	PTGES2	High-evidence
orf9b	O94826	SARS_CoV_2	0.681727	15	15	30	32353859;32728199;33060197;33845483;33990585;34709727;34901782;35337019;35643212;36071039;36217030;36576175;37682539;37939376;40593736;888800000082;888800000104;888800000109;888800000168;888800000329	TOMM70	High-evidence
orf9b	O94826	SARS_CoV_1	0.675765	2	2	4	32728199;33060197;33845483	TOMM70	High-evidence
nsp7	P51148	SARS_CoV_2	0.673192	7	0	7	32353859;33060197;34709727;36225252;39147351	RAB5C	Medium-evidence
E	Q9UBS3	MERS	0.671471	1	0	1	33060197	DNAJB9	Low-evidence
E	O75787	MERS	0.669745	1	0	1	33060197	ATP6AP2	Low-evidence
nsp7	Q9H7Z7	SARS_CoV_1	0.66628	1	0	1	33060197	PTGES2	Low-evidence
nsp7	Q13724	MERS	0.662796	1	0	1	33060197	MOGS	Low-evidence
nsp9	Q7Z3B4	SARS_CoV_2	0.660172	6	1	7	32353859;33060197;34597346;34709727;36217030;37483225;40593736	NUP54	High-evidence
orf6	P78406	SARS_CoV_2	0.658418	11	14	25	32353859;32838362;33060197;33360543;33766124;33849972;34597346;34709727;35096974;35970938;36007063;36217030;37483225;37511350;39480836;888800000082;888800000104;888800000109;888800000817;888800000819	RAE1	High-evidence
nsp9	Q14232	SARS_CoV_1	0.657538	1	0	1	33060197	EIF2B1	Low-evidence
orf4b	O00629	MERS	0.640636	1	0	1	33060197	KPNA4	Low-evidence
E	Q9NPI6	MERS	0.637031	1	0	1	33060197	DCP1A	Low-evidence
nsp9	Q8IWP9	MERS	0.624294	1	0	1	33060197	CCDC28A	Low-evidence
nsp1	P49642	SARS_CoV_1	0.622	1	1	2	33060197;34719824	PRIM1	High-evidence
nsp9	Q8N0X7	SARS_CoV_2	0.620162	4	0	4	32353859;32838362;33060197;34597346	SPART	Medium-evidence
nsp9	Q8N1G2	SARS_CoV_1	0.601125	1	0	1	33060197	CMTR1	Low-evidence
nsp9	Q9NZL9	SARS_CoV_2	0.599251	4	0	4	32353859;33060197;36217030;888800000817	MAT2B	Medium-evidence
orf10	Q15369	SARS_CoV_2	0.598782	3	1	4	32353859;33060197;36217030;37483225	ELOC	High-evidence
nsp8	O76094	SARS_CoV_1	0.596903	1	0	1	33060197	SRP72	Low-evidence
nsp1	Q14181	SARS_CoV_2	0.591251	5	1	6	32353859;33060197;34719824;36217030;888800000082;888800000168	POLA2	High-evidence
nsp1	P49642	SARS_CoV_2	0.588889	3	1	4	32353859;33060197;34719824;888800000168	PRIM1	High-evidence
E	P25440	SARS_CoV_2	0.58747	3	5	8	32353859;33060197;35839775;39066826;888800000817	BRD2	High-evidence
nsp1	Q14181	SARS_CoV_1	0.581303	1	1	2	33060197;34719824	POLA2	High-evidence
orf8	Q92820	SARS_CoV_2	0.580828	4	0	4	32353859;33060197;33845483;888800000104	GGH	Medium-evidence
nsp9	P62310	MERS	0.580352	1	0	1	33060197	LSM 3.00	Low-evidence
orf8a	P40855	SARS_CoV_1	0.580352	1	0	1	33060197	PEX19	Low-evidence
nsp7	Q8WTV0	SARS_CoV_2	0.579876	5	0	5	32353859;33060197;36217030;37499664;888800000104	SCARB1	Medium-evidence
nsp9	Q6SZW1	MERS	0.5794	1	0	1	33060197	SARM1	Low-evidence
orf10	Q13617	SARS_CoV_2	0.578924	3	2	5	32353859;33060197;33827988;37483225	CUL2	High-evidence
nsp7	Q8WTV0	SARS_CoV_1	0.577019	2	0	2	33060197;37499664	SCARB1	Medium-evidence
nsp6	Q15904	SARS_CoV_2	0.575111	10	3	13	32353859;33060197;33845483;34997207;36180527;37483225;37768083;888800000104;888800000109;888800000168;888800000817	ATP6AP1	High-evidence
orf10	Q9C0D3	SARS_CoV_2	0.573201	3	8	11	32353859;33060197;33827988;35636250;35674692;37483225;39309499	ZYG11B	High-evidence
nsp9	Q96F45	SARS_CoV_2	0.572723	4	0	4	32353859;33060197;33080218;37499664	ZNF503	Medium-evidence
nsp13	Q9UHD2	SARS_CoV_2	0.572245	4	5	9	32353859;33060197;33707416;34996837;37483225;38777146;888800000817	TBK1	High-evidence
E	Q9Y5L0	MERS	0.570331	1	0	1	33060197	TNPO3	Low-evidence
M	O75439	SARS_CoV_2	0.566019	8	0	8	32353859;33060197;33845483;38569033;40593736;888800000109	PMPCB	Medium-evidence
E	Q86VM9	SARS_CoV_2	0.563618	4	0	4	32353859;33060197;36217030;37499664	ZC3H18	Medium-evidence
nsp10	P55789	SARS_CoV_2	0.562177	3	1	4	32353859;33060197;34845387;36217030	GFER	High-evidence
nsp12	Q70EL1	SARS_CoV_1	0.559531	1	1	2	33060197;34845387	USP54	High-evidence
nsp9	Q8N0X7	SARS_CoV_1	0.558568	1	0	1	33060197	SPART	Low-evidence
nsp7	Q9BQE4	MERS	0.556159	1	0	1	33060197	SELENOS	Low-evidence
nsp1	Q99959	SARS_CoV_2	0.551332	6	0	6	32353859;33060197;34709727;36217030;888800000082	PKP2	Medium-evidence
nsp12	Q70EL1	SARS_CoV_2	0.549157	5	1	6	32353859;33060197;34845387;36217030;888800000082;888800000817	USP54	High-evidence
nsp7	Q12907	SARS_CoV_1	0.547948	1	0	1	33060197	LMAN2	Low-evidence
E	O60885	SARS_CoV_2	0.545286	3	7	10	32353859;33060197;35716662;35839775;39066826;888800000817	BRD4	High-evidence
nsp16	Q9UBI1	SARS_CoV_2	0.543833	3	0	3	33060197;34672954;34901782	COMMD3	Medium-evidence
orf3	P54727	MERS	0.543106	1	0	1	33060197	RAD23B	Low-evidence
nsp13	Q9BQS8	SARS_CoV_2	0.529872	3	0	3	32353859;33060197;36217030	FYCO1	Medium-evidence
N	Q9NR30	SARS_CoV_2	0.528655	38	3	41	32353859;33060197;33766124;34029587;34901782;35107372;35232816;35652658;36135776;36180527;37314180;38043095;38172120;38492217;39066279;39501047;39506849;40593736;888800000104;888800000168;888800000956	DDX21	High-evidence
E	Q8WVM8	MERS	0.528412	1	0	1	33060197	SCFD1	Low-evidence
nsp8	O00566	SARS_CoV_2	0.528047	6	0	6	32353859;33060197;34578187;36217030;38172120;40593736	MPHOSPH10	Medium-evidence
nsp6	Q99720	SARS_CoV_1	0.524151	2	0	2	33060197;33845483	SIGMAR1	Medium-evidence
nsp12	Q8TD31	SARS_CoV_1	0.522446	2	0	2	22046132;33060197	CCHCR1	Medium-evidence
nsp12	Q13546	SARS_CoV_1	0.521959	1	0	1	33060197	RIPK1	Low-evidence
nsp13	O14578	SARS_CoV_2	0.520984	3	0	3	32353859;33060197;888800000817	CIT	Medium-evidence
nsp6	Q99720	SARS_CoV_2	0.51818	8	1	9	32353859;33060197;33845483;36180527;36217030;37483225;37768083;888800000082;888800000168	SIGMAR1	High-evidence
nsp12	Q13546	SARS_CoV_2	0.517571	6	2	8	32353859;33060197;34597346;34663909;36217030;888800000082;888800000817	RIPK1	High-evidence
nsp13	Q92995	SARS_CoV_2	0.517449	5	1	6	32353859;33060197;33707416;38777146;888800000082;888800000817	USP13	High-evidence
nsp1	P49643	SARS_CoV_1	0.515315	1	2	3	33060197;34719824;34845387	PRIM2	High-evidence
orf8	Q9UHI8	SARS_CoV_2	0.514278	3	1	4	32353859;33060197;36217030;37318366	ADAMTS1	High-evidence
nsp13	Q8IWJ2	SARS_CoV_2	0.51312	3	0	3	32353859;33060197;34709727	GCC2	Medium-evidence
N	P67870	SARS_CoV_2	0.511717	9	3	12	32353859;33060197;34578187;34597346;35211278;37483225;37705046;38177924;39147351;39501047;888800000817	CSNK2B	High-evidence
M	P05026	SARS_CoV_2	0.511473	6	0	6	32353859;32838362;33060197;34709727;888800000104;888800000817	ATP1B1	Medium-evidence
orf8	Q6UW63	SARS_CoV_2	0.51013	5	0	5	32353859;33060197;34597346;888800000104;888800000817	POGLUT2	Medium-evidence
orf3a	Q96S66	SARS_CoV_2	0.509581	16	3	19	32353859;32838362;33060197;33845483;34232536;34597346;34672954;34709727;34901782;36217030;37478010;37939376;888800000104;888800000109;888800000168	CLCC1	High-evidence
N	Q8TAD8	SARS_CoV_2	0.509032	3	0	3	32353859;33060197;888800000817	SNIP1	Medium-evidence
N	Q9Y3U8	SARS_CoV_2	0.508788	11	2	13	32353859;33060197;33080218;33766124;34029587;36135776;36180527;38172120;39066279;39147351;888800000082;888800000817	RPL36	High-evidence
nsp13	Q5VU43	SARS_CoV_2	0.508239	4	0	4	32353859;33060197;36217030;888800000817	PDE4DIP	Medium-evidence
nsp16	O95754	SARS_CoV_2	0.508117	1	0	1	33060197	SEMA4F	Low-evidence
nsp16	Q9H4B6	SARS_CoV_2	0.506744	1	0	1	33060197	SAV1	Low-evidence
nsp9	Q86YT6	SARS_CoV_2	0.506347	4	0	4	32353859;33060197;36217030;888800000168	MIB1	Medium-evidence
nsp13	Q08379	SARS_CoV_2	0.505951	5	0	5	32353859;33060197;36217030;38777146;888800000817	GOLGA2	Medium-evidence
nsp12	Q6UUV7	SARS_CoV_1	0.505432	1	0	1	33060197	CRTC3	Low-evidence
nsp7	Q6ZRP7	MERS	0.505401	1	0	1	33060197	QSOX2	Low-evidence
nsp13	Q7Z7A1	SARS_CoV_2	0.505127	4	0	4	32353859;33060197;40593736	CNTRL	Medium-evidence
nsp8	Q4G0J3	SARS_CoV_1	0.505096	1	0	1	33060197	LARP7	Low-evidence
nsp13	Q9BQQ3	SARS_CoV_2	0.504608	5	0	5	32353859;33060197;36217030;38777146;888800000817	GORASP1	Medium-evidence
nsp13	Q5VT06	SARS_CoV_2	0.503616	4	0	4	32353859;33060197;40593736	CEP350	Medium-evidence
nsp12	Q86SQ0	SARS_CoV_1	0.502884	1	0	1	33060197	PHLDB2	Low-evidence
nsp12	Q9HAU0	SARS_CoV_1	0.502426	1	0	1	33060197	PLEKHA5	Low-evidence
nsp13	Q9ULV0	SARS_CoV_1	0.502151	1	0	1	33060197	MYO5B	Low-evidence
nsp9	Q8TD19	SARS_CoV_2	0.501534	4	3	7	32353859;33060197;33845483;37483225;37704626;40593736	NEK9	High-evidence
nsp12	O43303	SARS_CoV_1	0.501129	1	0	1	33060197	CCP110	Low-evidence
nsp11	Q92624	SARS_CoV_1	0.500444	1	0	1	33060197	APPBP2	Low-evidence
nsp9	Q86YT6	MERS	0.50018	1	0	1	33060197	MIB1	Low-evidence
nsp13	Q8NDN9	MERS	0.500081	1	0	1	33060197	RCBTB1	Low-evidence
nsp13	Q9BZF9	SARS_CoV_1	0.499971	1	0	1	33060197	UACA	Low-evidence
nsp13	Q9Y2I6	SARS_CoV_2	0.499615	3	0	3	32353859;33060197;888800000817	NINL	Medium-evidence
nsp13	Q8N4C6	SARS_CoV_1	0.498741	1	0	1	33060197	NIN	Low-evidence
orf8	Q9BS26	SARS_CoV_2	0.498192	7	0	7	32353859;33060197;34597346;36217030;40593736;888800000104;888800000817	ERP44	Medium-evidence
N	Q8NCA5	SARS_CoV_2	0.497879	16	0	16	32353859;33060197;33989516;34029587;34597346;37211047;38043095;38172120;38492217;38986614;39147351;39506849;888800000082;888800000168;888800000817;888800000956	FAM98A	Medium-evidence
nsp13	Q96SN8	SARS_CoV_2	0.497803	5	0	5	32353859;33060197;40593736;888800000104;888800000817	CDK5RAP2	Medium-evidence
nsp9	P35658	SARS_CoV_2	0.49707	3	0	3	32353859;33060197;888800000833	NUP214	Medium-evidence
S	Q7Z5G4	SARS_CoV_2	0.496872	4	1	5	32353859;33060197;33845483;34961524	GOLGA7	High-evidence
nsp12	Q13948	SARS_CoV_1	0.495758	1	0	1	33060197	CUX1	Low-evidence
nsp9	P41250	MERS	0.495728	1	0	1	33060197	GARS1	Low-evidence
nsp13	P49454	SARS_CoV_2	0.495545	5	0	5	32353859;33060197;34709727;40593736;888800000817	CENPF	Medium-evidence
N	P11940	SARS_CoV_2	0.494202	20	5	25	32353859;33060197;33766124;33876849;33989516;34029587;34845387;35652658;36135776;36180527;36217030;37211047;37314180;37929963;38043095;38172120;39506849;888800000817;888800000956	PABPC1	High-evidence
nsp13	Q96SN8	MERS	0.494171	1	0	1	33060197	CDK5RAP2	Low-evidence
nsp12	Q8IWR0	SARS_CoV_2	0.493805	9	0	9	32353859;33060197;38043095;888800000082;888800000817;888800000956	ZC3H7A	Medium-evidence
nsp12	O14874	SARS_CoV_2	0.492402	3	3	6	32353859;33060197;38235848;888800000817	BCKDK	High-evidence
nsp9	Q9BVL2	SARS_CoV_2	0.49048	2	1	3	32353859;33060197;37483225	NUP58	High-evidence
nsp16	P28838	SARS_CoV_2	0.489626	5	0	5	33060197;36217029;39147351;888800000082;888800000104	LAP3	Medium-evidence
nsp13	Q5VT06	SARS_CoV_1	0.489626	1	0	1	33060197	CEP350	Low-evidence
nsp12	Q99081	SARS_CoV_2	0.488649	5	2	7	32353859;33060197;36217030;38235848;38777146;888800000817	TCF12	High-evidence
nsp8	O00566	SARS_CoV_1	0.488527	1	0	1	33060197	MPHOSPH10	Low-evidence
nsp16	P28838	SARS_CoV_1	0.487429	1	0	1	33060197	LAP3	Low-evidence
nsp16	Q05086	SARS_CoV_2	0.486454	1	0	1	33060197	UBE3A	Low-evidence
nsp13	Q96SN8	SARS_CoV_1	0.485417	1	0	1	33060197	CDK5RAP2	Low-evidence
orf4b	P52292	MERS	0.485173	1	0	1	33060197	KPNA2	Low-evidence
nsp9	Q15056	SARS_CoV_2	0.484685	10	0	10	32353859;32838362;33060197;34597346;38043095;40593736;888800000956	EIF4H	Medium-evidence
nsp12	Q5VUA4	SARS_CoV_1	0.482673	1	0	1	33060197	ZNF318	Low-evidence
nsp1	P09884	SARS_CoV_1	0.482673	1	2	3	33060197;34719824	POLA1	High-evidence
nsp13	Q8N3C7	SARS_CoV_2	0.481332	3	0	3	32353859;33060197;36217030	CLIP4	Medium-evidence
orf8	Q9H173	SARS_CoV_2	0.480722	5	1	6	32353859;33060197;34597346;37483225;888800000104;888800000817	SIL1	High-evidence
N	Q9NW13	SARS_CoV_2	0.477189	7	0	7	32353859;33060197;34029587;34578187;38172120;40593736;888800000817	RBM28	Medium-evidence
nsp12	A3KN83	SARS_CoV_2	0.476701	3	0	3	32353859;33060197;888800000817	SBNO1	Medium-evidence
N	Q13283	SARS_CoV_2	0.47658	46	45	91	32353859;32838362;33060197;33479198;33495715;33781803;33845483;33989516;34029587;34232536;34578187;34597346;34634033;34709727;34780058;34799561;34845387;34901782;35075101;35211260;35211278;35240128;35652658;36081788;36095012;36217029;36217030;37185839;37192911;37211047;37607209;37794589;38043095;38172120;38245532;38492217;38986614;39066279;39135075;39147351;39459161;39501047;39506849;40593736;888…	G3BP1	High-evidence
nsp12	Q2T9J0	SARS_CoV_1	0.476336	1	0	1	33060197	TYSND1	Low-evidence
nsp13	Q9Y4I1	SARS_CoV_1	0.475849	1	0	1	33060197	MYO5A	Low-evidence
nsp9	Q86YT6	SARS_CoV_1	0.47524	1	0	1	33060197	MIB1	Low-evidence
orf4b	O00505	MERS	0.474996	1	0	1	33060197	KPNA3	Low-evidence
nsp12	Q14157	SARS_CoV_2	0.474631	12	0	12	32353859;33060197;34709727;35337019;35652658;36217030;38043095;38986614;39147351;888800000082;888800000817;888800000956	UBAP2L	Medium-evidence
nsp12	Q13615	SARS_CoV_1	0.474266	1	0	1	33060197	MTMR3	Low-evidence
E	O43505	MERS	0.473292	1	0	1	33060197	B4GAT1	Low-evidence
nsp8	O95260	SARS_CoV_2	0.473049	3	0	3	32353859;33060197;33845483	ATE1	Medium-evidence
N	Q13310	SARS_CoV_2	0.472318	23	3	26	32353859;33060197;33766124;33989516;34029587;34612687;35652658;36135776;36180527;37211047;37314180;37794589;38043095;38172120;39506849;40593736;888800000817;888800000956	PABPC4	High-evidence
nsp13	Q08378	SARS_CoV_2	0.471102	6	0	6	32353859;33060197;34709727;35211260;888800000817	GOLGA3	Medium-evidence
nsp13	Q9C0B0	MERS	0.470007	1	0	1	33060197	UNK	Low-evidence
nsp16	Q9H000	SARS_CoV_2	0.468304	3	0	3	33060197;34597346;888800000082	MKRN2	Medium-evidence
orf8	Q8N0Z8	SARS_CoV_2	0.464902	2	0	2	32353859;33060197	PUSL1	Medium-evidence
nsp8	O95260	SARS_CoV_1	0.463201	1	0	1	33060197	ATE1	Low-evidence
nsp13	Q9Y2I6	MERS	0.462959	1	0	1	33060197	NINL	Low-evidence
nsp12	Q9H2H8	SARS_CoV_2	0.462716	5	2	7	32353859;33060197;38043095;38235848;888800000817;888800000956	PPIL3	High-evidence
nsp12	Q5EBL8	SARS_CoV_2	0.461988	3	0	3	32353859;33060197;888800000817	PDZD11	Medium-evidence
nsp13	P17612	SARS_CoV_2	0.461988	3	3	6	32353859;33060197;37483225;38445884;888800000817	PRKACA	High-evidence
M	Q96D53	SARS_CoV_2	0.458834	4	0	4	32353859;33060197;33845483;34709727	COQ8B	Medium-evidence
nsp7	Q12907	SARS_CoV_2	0.456652	4	0	4	32353859;33060197;34837059;36572190	LMAN2	Medium-evidence
nsp16	O75382	SARS_CoV_2	0.453504	3	0	3	33060197;36217029;888800000168	TRIM3	Medium-evidence
nsp7	P62873	SARS_CoV_2	0.45302	6	0	6	32353859;33060197;34709727;38172120;39147351;40593736	GNB1	Medium-evidence
orf8	Q8N766	SARS_CoV_2	0.45181	8	0	8	32353859;33060197;34597346;34709727;36217030;40593736;888800000104;888800000109	EMC1	Medium-evidence
orf8	Q86YB8	SARS_CoV_2	0.450601	4	1	5	32353859;33060197;34597346;37483225;888800000104	ERO1B	High-evidence
nsp12	Q9H2H8	SARS_CoV_1	0.449634	1	0	1	33060197	PPIL3	Low-evidence
orf3a	Q9UH99	SARS_CoV_2	0.449634	6	0	6	32353859;33060197;34709727;36217030;40593736;888800000817	SUN2	Medium-evidence
N	Q9UN86	SARS_CoV_2	0.446736	40	20	60	32353859;32838362;33060197;33495715;33781803;33845483;33989516;34029587;34232536;34578187;34597346;34634033;34709727;34780058;34799561;34845387;34901782;35211260;35211278;35337019;35652658;36081788;36217029;36217030;36560452;37211047;37794589;38043095;38172120;38245532;38492217;38986614;39066279;39501047;39506849;40593736;888800000082;888800000104;888800000168;888800000817;888800000956	G3BP2	High-evidence
nsp16	Q13188	SARS_CoV_2	0.445771	1	0	1	33060197	STK3	Low-evidence
nsp12	O15014	SARS_CoV_1	0.443841	1	0	1	33060197	ZNF609	Low-evidence
nsp16	Q6ZU80	SARS_CoV_2	0.442636	1	0	1	33060197	CEP128	Low-evidence
N	Q6PKG0	SARS_CoV_2	0.441914	25	6	31	32353859;33060197;33111431;34029587;34672947;34672954;36135776;36217030;37211047;37483225;38043095;38172120;38177924;38777146;39066279;39147351;40593736;888800000817;888800000956	LARP1	High-evidence
nsp12	Q92615	SARS_CoV_2	0.437343	8	0	8	32353859;33060197;34597346;38043095;888800000082;888800000817;888800000956	LARP4B	Medium-evidence
nsp16	Q96LT9	SARS_CoV_2	0.436382	1	0	1	33060197	RNPC3	Low-evidence
nsp13	P09493	MERS	0.435902	1	0	1	33060197	TPM1	Low-evidence
nsp12	O15078	SARS_CoV_1	0.435902	1	0	1	33060197	CEP290	Low-evidence
E	Q6UX04	SARS_CoV_2	0.435902	4	0	4	32353859;33060197;34597346;888800000817	CWC27	Medium-evidence
nsp12	Q6UUV7	SARS_CoV_2	0.434941	3	3	6	32353859;33060197;38235848;888800000817	CRTC3	High-evidence
nsp1	P49643	SARS_CoV_2	0.434941	3	2	5	32353859;33060197;34719824;34845387;888800000168	PRIM2	High-evidence
nsp13	P49454	MERS	0.434461	1	0	1	33060197	CENPF	Low-evidence
nsp12	A3KN83	SARS_CoV_1	0.433022	1	0	1	33060197	SBNO1	Low-evidence
nsp7	P61026	SARS_CoV_2	0.431105	12	0	12	32353859;33060197;34709727;36225252;38777146;39147351;40593736;888800000833	RAB10	Medium-evidence
nsp13	Q9BQS8	MERS	0.42919	1	0	1	33060197	FYCO1	Low-evidence
M	P05026	SARS_CoV_1	0.42919	1	0	1	33060197	ATP1B1	Low-evidence
nsp8	Q4G0J3	SARS_CoV_2	0.428233	6	0	6	32353859;33060197;34578187;35652658;37314180;888800000817	LARP7	Medium-evidence
nsp13	Q13045	SARS_CoV_1	0.424889	1	0	1	33060197	FLII	Low-evidence
nsp1	P40763	MERS	0.424889	1	0	1	33060197	STAT3	Low-evidence
nsp13	Q96N16	SARS_CoV_2	0.424412	4	0	4	32353859;33060197;36217030;888800000817	JAKMIP1	Medium-evidence
nsp16	Q7Z3J2	SARS_CoV_2	0.423458	1	0	1	33060197	VPS35L	Low-evidence
nsp13	Q8N4C6	MERS	0.423458	1	0	1	33060197	NIN	Low-evidence
M	Q10713	SARS_CoV_2	0.421552	5	0	5	32353859;33060197;34597346;40593736	PMPCA	Medium-evidence
nsp13	Q96CN9	SARS_CoV_2	0.4206	4	0	4	32353859;33060197;36560452;888800000817	GCC1	Medium-evidence
orf8	Q96AY3	SARS_CoV_2	0.419648	5	1	6	32353859;33060197;34597346;37483225;888800000104;888800000817	FKBP10	High-evidence
nsp13	Q8IWJ2	MERS	0.417271	1	0	1	33060197	GCC2	Low-evidence
N	Q92900	SARS_CoV_2	0.413477	19	2	21	32353859;33060197;34029587;34597346;34709727;35337019;36572190;37211047;38043095;38986614;39147351;39506849;40593736;888800000104;888800000817;888800000956;888800001166	UPF1	High-evidence
orf8	Q15818	SARS_CoV_2	0.413004	7	0	7	32353859;33060197;33845483;34709727;888800000104;888800000168;888800000817	NPTX1	Medium-evidence
orf6	P52948	SARS_CoV_2	0.413004	7	7	14	32353859;33060197;33849972;34597346;35970938;38507240;38514841;39480836;888800000082;888800000104;888800000109;888800000817;888800000819	NUP98	High-evidence
nsp7	Q9Y3D7	SARS_CoV_1	0.411111	1	0	1	33060197	PAM16	Low-evidence
nsp7	Q9NX40	MERS	0.404507	1	0	1	33060197	OCIAD1	Low-evidence
nsp13	Q08117	SARS_CoV_2	0.404037	3	0	3	32353859;33060197;888800000817	TLE5	Medium-evidence
orf8	Q8IV08	SARS_CoV_2	0.403567	5	0	5	32353859;33060197;888800000104;888800000109;888800000817	PLD3	Medium-evidence
nsp12	Q2NL68	SARS_CoV_1	0.401218	1	0	1	33060197	PROSER3	Low-evidence
nsp16	Q9H0H0	SARS_CoV_2	0.400749	3	0	3	33060197;888800000082;888800000104	INTS2	Medium-evidence
nsp13	Q9BV73	SARS_CoV_1	0.400749	1	0	1	33060197	CEP250	Low-evidence
nsp16	Q9UHD2	SARS_CoV_2	0.400749	3	0	3	33060197;38777146;888800000082	TBK1	Medium-evidence
nsp12	Q5JSZ5	SARS_CoV_2	0.40028	10	0	10	32353859;33060197;34597346;37499664;38043095;38777146;40593736;888800000082;888800000104;888800000956	PRRC2B	Medium-evidence
nsp16	Q9BVQ7	SARS_CoV_2	0.399343	4	0	4	33060197;38777146;888800000082;888800000109	AFG2B	Medium-evidence
orf8	Q9H8W4	SARS_CoV_2	0.398875	2	0	2	32353859;33060197	PLEKHF2	Medium-evidence
M	P40763	SARS_CoV_1	0.397003	1	0	1	33060197	STAT3	Low-evidence
nsp12	Q2T9J0	SARS_CoV_2	0.396068	2	0	2	32353859;33060197	TYSND1	Medium-evidence
nsp16	O43933	SARS_CoV_2	0.396068	2	0	2	33060197;38777146	PEX1	Medium-evidence
nsp10	O94973	SARS_CoV_2	0.395601	9	1	10	32353859;33060197;34709727;34845387;36217030;39147351;40593736	AP2A2	High-evidence
nsp13	Q92614	SARS_CoV_1	0.394201	1	0	1	33060197	MYO18A	Low-evidence
nsp16	Q9Y2D8	SARS_CoV_2	0.393269	4	0	4	33060197;36217029;888800000082;888800000104	SSX2IP	Medium-evidence
nsp13	P67936	MERS	0.392803	1	0	1	33060197	TPM4	Low-evidence
nsp12	Q6ZRI6	SARS_CoV_1	0.392337	2	0	2	33060197;37499664	C15orf39	Medium-evidence
nsp13	P35241	SARS_CoV_2	0.391871	13	0	13	32353859;33060197;34504087;34709727;36217030;36572190;38777146;40593736;888800000082;888800000817	RDX	Medium-evidence
nsp16	Q86X10	SARS_CoV_2	0.390941	3	0	3	33060197;38777146;888800000082	RALGAPB	Medium-evidence
M	Q5JRX3	SARS_CoV_2	0.389547	5	0	5	32353859;33060197;33845483;34597346;40593736	PITRM1	Medium-evidence
nsp16	Q8N668	SARS_CoV_2	0.388618	1	0	1	33060197	COMMD1	Low-evidence
nsp13	Q9UNZ2	MERS	0.385837	1	0	1	33060197	NSFL1C	Low-evidence
N	Q13283	SARS_CoV_1	0.385375	4	4	8	33060197;33845483;34232536;34799561;34845387	G3BP1	High-evidence
nsp16	Q13043	SARS_CoV_2	0.38445	1	0	1	33060197	STK4	Low-evidence
N	Q9UN86	SARS_CoV_1	0.383526	2	4	6	33060197;34232536;34799561;34845387	G3BP2	High-evidence
nsp16	Q9UHP3	SARS_CoV_2	0.382603	5	0	5	33060197;36217029;888800000082;888800000104;888800000168	USP25	Medium-evidence
nsp7	O95159	MERS	0.382141	1	0	1	33060197	ZFPL1	Low-evidence
nsp12	Q8IWR0	SARS_CoV_1	0.382141	1	0	1	33060197	ZC3H7A	Low-evidence
orf8	Q96F46	SARS_CoV_2	0.38168	2	2	4	32353859;33060197;37318366	IL17RA	High-evidence
nsp13	Q9Y2I6	SARS_CoV_1	0.380299	1	0	1	33060197	NINL	Low-evidence
nsp13	Q08378	SARS_CoV_1	0.379378	1	0	1	33060197	GOLGA3	Low-evidence
nsp12	Q96M11	SARS_CoV_1	0.378919	1	0	1	33060197	HYLS1	Low-evidence
nsp13	Q9BV73	SARS_CoV_2	0.375706	2	0	2	32353859;33060197	CEP250	Medium-evidence
M	Q00765	SARS_CoV_2	0.374791	9	0	9	32353859;32838362;33060197;34672954;37478010;38569033;888800000104;888800000817	REEP5	Medium-evidence
nsp13	Q8N8E3	SARS_CoV_2	0.372049	3	0	3	32353859;33060197;888800000817	CEP112	Medium-evidence
nsp7	Q9NP72	SARS_CoV_2	0.371137	4	0	4	32353859;33060197;34709727;36225252	RAB18	Medium-evidence
nsp13	Q08379	MERS	0.371137	1	0	1	33060197	GOLGA2	Low-evidence
nsp7	Q9H7Z7	MERS	0.370225	1	0	1	33060197	PTGES2	Low-evidence
nsp13	Q8IUD2	SARS_CoV_1	0.369315	1	0	1	33060197	ERC1	Low-evidence
nsp1	P09884	SARS_CoV_2	0.368406	10	1	11	32353859;33060197;34597346;34719824;40593736;888800000082;888800000104;888800000168	POLA1	High-evidence
nsp11	O75347	SARS_CoV_2	0.367497	2	0	2	32353859;33060197	TBCA	Medium-evidence
nsp12	Q5EBL8	SARS_CoV_1	0.36659	1	0	1	33060197	PDZD11	Low-evidence
nsp13	Q8TD10	SARS_CoV_2	0.364778	3	0	3	32353859;33060197;888800000817	MIPOL1	Medium-evidence
M	Q96D53	SARS_CoV_1	0.360264	1	0	1	33060197	COQ8B	Low-evidence
nsp13	Q4V328	SARS_CoV_2	0.358465	4	0	4	32353859;33060197;34709727;40593736	GRIPAP1	Medium-evidence
nsp16	O14972	SARS_CoV_2	0.358465	1	0	1	33060197	VPS26C	Low-evidence
nsp12	Q96IZ5	SARS_CoV_1	0.35488	1	0	1	33060197	RBM41	Low-evidence
nsp7	Q8NBU5	MERS	0.35488	1	0	1	33060197	ATAD1	Low-evidence
nsp16	Q9P2D0	SARS_CoV_2	0.35488	8	0	8	33060197;34672954;34709727;38777146;888800000082;888800000104	IBTK	Medium-evidence
nsp16	Q53EZ4	SARS_CoV_2	0.352202	2	0	2	33060197;888800000082	CEP55	Medium-evidence
nsp12	Q92908	SARS_CoV_1	0.348645	1	0	1	33060197	GATA6	Low-evidence
E	Q8IZ52	MERS	0.346873	1	0	1	33060197	CHPF	Low-evidence
nsp8	O96028	SARS_CoV_2	0.346873	2	0	2	32353859;33060197	NSD2	Medium-evidence
orf3	Q14145	MERS	0.345989	1	0	1	33060197	KEAP1	Low-evidence
nsp12	Q9HAU0	SARS_CoV_2	0.345105	6	0	6	32353859;33060197;36217030;38777146;888800000082;888800000817	PLEKHA5	Medium-evidence
nsp7	P21964	SARS_CoV_2	0.341582	3	1	4	32353859;33060197;37483225;40593736	COMT	High-evidence
nsp12	Q5T6F2	SARS_CoV_2	0.339828	7	0	7	32353859;33060197;34709727;38043095;888800000082;888800000817;888800000956	UBAP2	Medium-evidence
N	P19784	SARS_CoV_2	0.339828	4	2	6	32353859;33060197;33259812;37483225;39147351;888800000817	CSNK2A2	High-evidence
nsp9	Q8TD19	SARS_CoV_1	0.336331	2	0	2	33060197;33845483	NEK9	Medium-evidence
nsp16	O60826	SARS_CoV_2	0.334589	7	0	7	32838362;33060197;34672954;34709727;34901782;888800000082;888800000168	CCDC22	Medium-evidence
nsp2	Q8TF46	MERS	0.33372	1	0	1	33060197	DIS3L	Low-evidence
nsp12	Q5VUA4	SARS_CoV_2	0.332852	3	0	3	32353859;33060197;888800000817	ZNF318	Medium-evidence
M	Q14CZ7	SARS_CoV_1	0.33112	1	0	1	33060197	FASTKD3	Low-evidence
nsp14	P04637	MERS	0.330255	1	0	1	33060197	TP53	Low-evidence
nsp15	P61970	SARS_CoV_2	0.329392	2	0	2	32353859;33060197	NUTF2	Medium-evidence
nsp12	Q96IZ5	SARS_CoV_2	0.328529	3	2	5	32353859;33060197;36217030;38235848	RBM41	High-evidence
M	Q9NVH2	SARS_CoV_1	0.327668	1	0	1	33060197	INTS7	Low-evidence
orf3a	P09601	SARS_CoV_2	0.325092	5	0	5	32353859;32838362;33060197;36217030;37609425	HMOX1	Medium-evidence
nsp13	Q8IUD2	SARS_CoV_2	0.32338	5	0	5	32353859;33060197;34709727;40593736;888800000104	ERC1	Medium-evidence
M	Q53R41	SARS_CoV_1	0.320821	1	0	1	33060197	FASTKD1	Low-evidence
orf8	Q9Y4L1	SARS_CoV_2	0.320821	9	0	9	32353859;33060197;34597346;34709727;36217030;40593736;888800000104;888800000817	HYOU1	Medium-evidence
nsp13	Q96N16	SARS_CoV_1	0.319121	1	0	1	33060197	JAKMIP1	Low-evidence
nsp2	Q9H1I8	MERS	0.318273	1	0	1	33060197	ASCC2	Low-evidence
nsp16	Q9NX08	SARS_CoV_2	0.314051	1	0	1	33060197	COMMD8	Low-evidence
E	Q6DD88	MERS	0.31237	1	0	1	33060197	ATL3	Low-evidence
nsp12	Q13033	SARS_CoV_1	0.309024	1	0	1	33060197	STRN3	Low-evidence
nsp16	Q12923	SARS_CoV_2	0.306527	2	0	2	33060197;888800000082	PTPN13	Medium-evidence
nsp10	Q9HAV7	SARS_CoV_2	0.306527	5	0	5	32353859;33060197;34709727;36225252;38777146	GRPEL1	Medium-evidence
nsp9	P35556	SARS_CoV_2	0.306527	2	0	2	32353859;33060197	FBN2	Medium-evidence
N	O43818	SARS_CoV_2	0.305697	8	0	8	32353859;33060197;34709727;38172120;888800000104	RRP9	Medium-evidence
nsp12	O15182	SARS_CoV_1	0.304869	1	0	1	33060197	CETN3	Low-evidence
nsp11	Q9C0D3	SARS_CoV_1	0.304042	1	0	1	33060197	ZYG11B	Low-evidence
orf8	Q9BZQ6	SARS_CoV_2	0.303216	5	1	6	32353859;33060197;34597346;37483225;888800000104;888800000817	EDEM3	High-evidence
orf8	Q9P2E5	SARS_CoV_2	0.301568	3	0	3	32353859;33060197;888800000104	CHPF2	Medium-evidence
nsp14	P49959	MERS	0.301568	1	0	1	33060197	MRE11	Low-evidence
nsp14	Q92878	MERS	0.295027	1	0	1	33060197	RAD50	Low-evidence
nsp14	P30153	MERS	0.290981	1	0	1	33060197	PPP2R1A	Low-evidence
orf3	P28482	MERS	0.290176	1	0	1	33060197	MAPK1	Low-evidence
E	Q9ULP9	SARS_CoV_1	0.290176	1	0	1	33060197	TBC1D24	Low-evidence
nsp13	Q8IUD2	MERS	0.289372	1	0	1	33060197	ERC1	Low-evidence
nsp13	Q92995	SARS_CoV_1	0.289372	1	0	1	33060197	USP13	Low-evidence
nsp10	Q9C026	MERS	0.287768	1	0	1	33060197	TRIM9	Low-evidence
nsp7	O14975	MERS	0.286968	1	0	1	33060197	SLC27A2	Low-evidence
nsp13	Q9UJC3	SARS_CoV_2	0.284576	3	0	3	32353859;33060197;888800000817	HOOK1	Medium-evidence
nsp16	Q8IUD2	SARS_CoV_2	0.283781	5	0	5	33060197;34709727;40593736;888800000082;888800000104	ERC1	Medium-evidence
N	Q8TAD8	SARS_CoV_1	0.283781	1	0	1	33060197	SNIP1	Low-evidence
nsp14	Q9NXA8	SARS_CoV_2	0.283781	5	4	9	32353859;32838362;33060197;34709727;35858407;36095012;888800000082	SIRT5	High-evidence
nsp13	Q04724	SARS_CoV_2	0.282988	4	0	4	32353859;33060197;34709727;888800000817	TLE1	Medium-evidence
nsp12	O75506	SARS_CoV_1	0.282988	1	0	1	33060197	HSBP1	Low-evidence
nsp6	Q9UDY4	MERS	0.282196	1	0	1	33060197	DNAJB4	Low-evidence
nsp7	O43169	SARS_CoV_2	0.281406	3	0	3	32353859;33060197;40593736	CYB5B	Medium-evidence
nsp2	Q5VT66	MERS	0.280616	1	0	1	33060197	MTARC1	Low-evidence
nsp13	Q5VU43	SARS_CoV_1	0.279828	2	0	2	33060197;33845483	PDE4DIP	Medium-evidence
nsp9	P61962	SARS_CoV_2	0.279828	2	0	2	32353859;33060197	DCAF7	Medium-evidence
orf8	Q96DZ1	SARS_CoV_2	0.279042	5	1	6	32353859;33060197;34597346;37483225;888800000104;888800000817	ERLEC1	High-evidence
nsp9	Q9UBX5	SARS_CoV_2	0.277473	2	0	2	32353859;33060197	FBLN5	Medium-evidence
nsp13	Q08378	MERS	0.277473	1	0	1	33060197	GOLGA3	Low-evidence
nsp16	Q86SQ0	SARS_CoV_2	0.272799	3	0	3	33060197;888800000082;888800000104	PHLDB2	Medium-evidence
orf8	O00469	SARS_CoV_2	0.272025	5	1	6	32353859;33060197;37483225;40593736;888800000104;888800000817	PLOD2	High-evidence
S	P09382	MERS	0.271252	1	0	1	33060197	LGALS1	Low-evidence
nsp16	A7MCY6	SARS_CoV_2	0.26971	1	0	1	33060197	TBKBP1	Low-evidence
nsp13	Q7Z406	SARS_CoV_1	0.26588	1	0	1	33060197	MYH14	Low-evidence
nsp16	Q9P000	SARS_CoV_2	0.26588	2	0	2	33060197;34901782	COMMD9	Medium-evidence
nsp16	Q86W92	SARS_CoV_2	0.26588	3	0	3	33060197;36217029;38777146	PPFIBP1	Medium-evidence
nsp8	Q96FK6	SARS_CoV_1	0.264358	1	0	1	33060197	WDR89	Low-evidence
orf3a	Q96JC1	SARS_CoV_2	0.261331	17	8	25	32353859;32838362;33060197;33422265;33845483;33947832;34597346;34709727;34901782;35337019;36217030;36695574;37939376;38448435;888800000082;888800000104;888800000109;888800000168	VPS39	High-evidence
nsp9	O00233	MERS	0.256832	1	0	1	33060197	PSMD9	Low-evidence
nsp13	P13861	SARS_CoV_2	0.256832	4	0	4	32353859;33060197;40593736;888800000817	PRKAR2A	Medium-evidence
M	Q9NQC3	SARS_CoV_2	0.255344	8	0	8	32353859;33060197;33845483;40593736;888800000082;888800000104	RTN4	Medium-evidence
nsp9	P35556	SARS_CoV_1	0.253861	1	0	1	33060197	FBN2	Low-evidence
nsp13	Q66GS9	MERS	0.252384	1	0	1	33060197	CEP135	Low-evidence
nsp2	Q8N9N2	MERS	0.249447	1	0	1	33060197	ASCC1	Low-evidence
nsp13	Q9BV19	SARS_CoV_2	0.249447	3	0	3	32353859;33060197;34687317	C1orf50	Medium-evidence
nsp13	Q66GS9	SARS_CoV_2	0.243642	4	0	4	32353859;33060197;888800000104;888800000817	CEP135	Medium-evidence
nsp14	Q96JN8	SARS_CoV_1	0.243642	1	0	1	33060197	NEURL4	Low-evidence
nsp16	Q567U6	SARS_CoV_2	0.242206	4	0	4	33060197;34709727;34901782;888800000082	CCDC93	Medium-evidence
nsp15	P62330	SARS_CoV_2	0.242206	3	0	3	32353859;33060197;36217030	ARF6	Medium-evidence
nsp16	Q7Z4G1	SARS_CoV_2	0.240775	1	0	1	33060197	COMMD6	Low-evidence
nsp2	P52306	SARS_CoV_2	0.240775	10	2	12	32353859;32838362;33060197;33845483;34159380;34373319;34709727;36217030;888800000082;888800000104;888800000303	RAP1GDS1	High-evidence
nsp14	Q9NXA8	SARS_CoV_1	0.240775	1	1	2	33060197;36095012	SIRT5	High-evidence
nsp7	Q96KC8	SARS_CoV_1	0.239349	1	0	1	33060197	DNAJC1	Low-evidence
nsp13	Q9BV73	MERS	0.239349	1	0	1	33060197	CEP250	Low-evidence
nsp16	Q5VUJ6	SARS_CoV_2	0.236516	2	0	2	33060197;888800000082	LRCH2	Medium-evidence
orf3	P29144	MERS	0.236516	1	0	1	33060197	TPP2	Low-evidence
nsp13	Q9UPN4	MERS	0.233706	1	0	1	33060197	CEP131	Low-evidence
orf3a	Q9Y673	SARS_CoV_2	0.23231	5	0	5	32353859;32838362;33060197;36217030;888800000817	ALG5	Medium-evidence
orf4b	O60684	MERS	0.23231	1	0	1	33060197	KPNA6	Low-evidence
nsp13	Q8TD10	MERS	0.23231	1	0	1	33060197	MIPOL1	Low-evidence
nsp7	P11233	SARS_CoV_2	0.229535	5	0	5	32353859;33060197;34709727;40593736	RALA	Medium-evidence
M	Q7RTS9	SARS_CoV_1	0.226784	1	0	1	33060197	DYM	Low-evidence
orf8	Q9H488	SARS_CoV_2	0.224055	4	0	4	32353859;33060197;34597346;888800000104	POFUT1	Medium-evidence
M	Q9Y4R8	SARS_CoV_1	0.224055	1	0	1	33060197	TELO2	Low-evidence
nsp7	Q6ZRP7	SARS_CoV_1	0.2227	1	0	1	33060197	QSOX2	Low-evidence
M	P07384	SARS_CoV_1	0.2227	1	0	1	33060197	CAPN1	Low-evidence
nsp16	O60232	SARS_CoV_1	0.221351	1	0	1	33060197	ZNRD2	Low-evidence
nsp2	Q7L2H7	MERS	0.218669	1	0	1	33060197	EIF3M	Low-evidence
nsp12	Q92615	SARS_CoV_1	0.218669	1	0	1	33060197	LARP4B	Low-evidence
nsp2	Q6NUN9	MERS	0.218669	1	0	1	33060197	ZNF746	Low-evidence
orf8	P58166	SARS_CoV_2	0.217338	3	0	3	32353859;33060197;888800000817	INHBE	Medium-evidence
nsp7	Q53H12	MERS	0.217338	1	0	1	33060197	AGK	Low-evidence
M	Q9UI26	MERS	0.216012	1	0	1	33060197	IPO11	Low-evidence
M	P61803	SARS_CoV_1	0.214691	1	0	1	33060197	DAD1	Low-evidence
nsp13	O60237	SARS_CoV_1	0.213377	1	0	1	33060197	PPP1R12B	Low-evidence
orf8	Q9Y680	SARS_CoV_2	0.213377	4	1	5	32353859;33060197;37483225;888800000104;888800000817	FKBP7	High-evidence
nsp16	Q13049	SARS_CoV_2	0.212069	4	0	4	33060197;36217029;38777146;888800001195	TRIM32	Medium-evidence
M	Q8TCJ2	SARS_CoV_1	0.212069	1	0	1	33060197	STT3B	Low-evidence
nsp7	O95573	MERS	0.210766	1	0	1	33060197	ACSL3	Low-evidence
nsp2	Q9BQ70	MERS	0.210766	1	0	1	33060197	TCF25	Low-evidence
nsp13	Q8N4C6	SARS_CoV_2	0.210766	5	0	5	32353859;33060197;38043095;888800000817;888800000956	NIN	Medium-evidence
orf8	Q9NYU1	SARS_CoV_2	0.208179	6	0	6	32353859;33060197;33845483;34597346;34709727;888800000104	UGGT2	Medium-evidence
N	P11940	SARS_CoV_1	0.206894	1	1	2	33060197;34845387	PABPC1	High-evidence
nsp13	O75506	SARS_CoV_2	0.206894	2	0	2	32353859;33060197	HSBP1	Medium-evidence
nsp16	Q9Y6G5	SARS_CoV_2	0.206894	1	0	1	33060197	COMMD10	Low-evidence
nsp1	Q8NBJ5	SARS_CoV_2	0.205615	5	0	5	32353859;33060197;34709727;36225252;38777146	COLGALT1	Medium-evidence
nsp16	Q5SVZ6	SARS_CoV_2	0.203075	4	0	4	33060197;34672954;34901782;888800000082	ZMYM1	Medium-evidence
orf3a	Q8IWR1	SARS_CoV_2	0.203075	4	2	6	32353859;32838362;33060197;36523164;37478010	TRIM59	High-evidence
M	Q7L8L6	SARS_CoV_2	0.201813	4	0	4	32353859;33060197;888800000104	FASTKD5	Medium-evidence
M	O15397	SARS_CoV_1	0.200558	1	0	1	33060197	IPO8	Low-evidence
orf8	P00750	SARS_CoV_2	0.198064	2	0	2	32353859;33060197	PLAT	Medium-evidence
nsp16	Q63ZY3	SARS_CoV_2	0.198064	5	0	5	33060197;34672954;40593736;888800000082	KANK2	Medium-evidence
nsp13	P31323	SARS_CoV_2	0.195594	3	0	3	32353859;33060197;888800000817	PRKAR2B	Medium-evidence
orf8	P12109	SARS_CoV_2	0.194368	3	0	3	32353859;33060197;888800000817	COL6A1	Medium-evidence
M	Q9UBF2	SARS_CoV_1	0.193147	1	0	1	33060197	COPG2	Low-evidence
nsp13	Q9BV19	SARS_CoV_1	0.191933	1	0	1	33060197	C1orf50	Low-evidence
nsp13	Q8TD10	SARS_CoV_1	0.190724	1	0	1	33060197	MIPOL1	Low-evidence
nsp7	Q96ER9	SARS_CoV_1	0.188324	1	0	1	33060197	CCDC51	Low-evidence
M	Q9UDR5	SARS_CoV_2	0.187133	2	0	2	32353859;33060197	AASS	Medium-evidence
nsp16	Q9NVH2	SARS_CoV_2	0.185947	3	0	3	33060197;888800000082;888800000104	INTS7	Medium-evidence
E	Q9BTV4	MERS	0.185947	1	0	1	33060197	TMEM43	Low-evidence
N	Q9HCE1	SARS_CoV_2	0.183594	21	7	28	32353859;33060197;33989516;34029587;34517762;34578187;34709727;35107372;35232816;36135776;36217030;37192911;37314180;37794589;38043095;38172120;39506849;888800000956	MOV10	High-evidence
nsp7	Q6ZRP7	SARS_CoV_2	0.182426	3	0	3	32353859;33060197;38777146	QSOX2	Medium-evidence
nsp7	P61019	SARS_CoV_2	0.182426	6	0	6	32353859;33060197;34709727;40593736;888800000104	RAB2A	Medium-evidence
nsp2	Q8NBU5	MERS	0.182426	1	0	1	33060197	ATAD1	Low-evidence
nsp13	Q9BQQ3	SARS_CoV_1	0.182426	1	0	1	33060197	GORASP1	Low-evidence
nsp13	Q04726	SARS_CoV_2	0.181263	4	0	4	32353859;33060197;34709727;888800000817	TLE3	Medium-evidence
orf8	Q99470	SARS_CoV_2	0.181263	2	1	3	32353859;33060197;37483225	SDF2	High-evidence
N	Q6PKG0	SARS_CoV_1	0.181263	1	1	2	33060197;33111431	LARP1	High-evidence
nsp12	O95391	SARS_CoV_2	0.181263	3	2	5	32353859;33060197;38235848;888800000817	SLU7	High-evidence
nsp13	P17612	SARS_CoV_1	0.178956	1	0	1	33060197	PRKACA	Low-evidence
N	Q8NCA5	SARS_CoV_1	0.178956	2	0	2	33060197;33845483	FAM98A	Medium-evidence
orf4b	Q93009	MERS	0.177811	2	0	2	33060197;35980206	USP7	Medium-evidence
nsp9	P35555	SARS_CoV_2	0.177811	2	0	2	32353859;33060197	FBN1	Medium-evidence
nsp13	O95684	SARS_CoV_2	0.176672	2	0	2	32353859;33060197	CEP43	Medium-evidence
nsp7	P61586	SARS_CoV_2	0.176672	9	0	9	32353859;33060197;34709727;36225252;37499664;39147351;40593736	RHOA	Medium-evidence
nsp12	O43823	SARS_CoV_2	0.176672	3	2	5	32353859;33060197;38235848;888800000817	AKAP8	High-evidence
nsp14	O95071	MERS	0.175538	1	0	1	33060197	UBR5	Low-evidence
nsp16	Q9P2S5	SARS_CoV_2	0.175538	2	0	2	33060197;888800000082	WRAP73	Medium-evidence
orf7a	Q9Y678	SARS_CoV_1	0.175538	1	0	1	33060197	COPG1	Low-evidence
nsp1	O60220	MERS	0.175538	1	0	1	33060197	TIMM8A	Low-evidence
M	Q96ER3	SARS_CoV_2	0.17441	2	0	2	32353859;33060197	SAAL1	Medium-evidence
orf8	Q8IZ52	SARS_CoV_2	0.17441	2	0	2	32353859;33060197	CHPF	Medium-evidence
nsp8	Q9ULT8	SARS_CoV_2	0.17441	11	1	12	32353859;32838362;33060197;34672954;34709727;38275298;40593736;888800000082;888800000104	HECTD1	High-evidence
orf8	P05556	SARS_CoV_2	0.17441	7	0	7	32353859;33060197;34597346;36217030;888800000104;888800000109;888800000817	ITGB1	Medium-evidence
nsp9	Q5SW79	MERS	0.173288	1	0	1	33060197	CEP170	Low-evidence
M	O95070	SARS_CoV_2	0.172172	9	0	9	32353859;33060197;34597346;38569033;888800000104;888800000109;888800000817	YIF1A	Medium-evidence
orf4a	O75569	MERS	0.171061	1	0	1	33060197	PRKRA	Low-evidence
nsp13	P35579	SARS_CoV_1	0.169956	1	1	2	33060197;34873039	MYH9	High-evidence
nsp2	Q96B26	MERS	0.169956	1	0	1	33060197	EXOSC8	Low-evidence
nsp13	Q5VUJ6	SARS_CoV_1	0.168857	1	0	1	33060197	LRCH2	Low-evidence
nsp13	P67936	SARS_CoV_1	0.167763	1	0	1	33060197	TPM4	Low-evidence
nsp13	P35241	SARS_CoV_1	0.167763	1	0	1	33060197	RDX	Low-evidence
orf8	Q9H4F8	SARS_CoV_2	0.166675	3	0	3	32353859;33060197;888800000104	SMOC1	Medium-evidence
nsp16	Q6ZWJ1	SARS_CoV_2	0.166675	2	0	2	33060197;34597346	STXBP4	Medium-evidence
nsp2	Q8WVC6	MERS	0.166675	1	0	1	33060197	DCAKD	Low-evidence
nsp16	O75665	SARS_CoV_2	0.166675	3	0	3	33060197;888800000082;888800000104	OFD1	Medium-evidence
orf8	Q99519	SARS_CoV_2	0.164516	3	0	3	32353859;33060197;888800000817	NEU1	Medium-evidence
M	Q9BXW9	SARS_CoV_1	0.16132	1	0	1	33060197	FANCD2	Low-evidence
nsp7	Q96DA6	SARS_CoV_2	0.16132	2	0	2	32353859;33060197	DNAJC19	Medium-evidence
nsp2	P00387	MERS	0.159217	1	0	1	33060197	CYB5R3	Low-evidence
orf8	Q8IWF2	SARS_CoV_2	0.159217	2	1	3	32353859;33060197;37483225	FOXRED2	High-evidence
nsp5	Q92769	SARS_CoV_2	0.159217	3	4	7	32353859;33060197;36173315;37483225;38172120;888800000927	HDAC2	High-evidence
E	Q8WY22	MERS	0.158174	1	0	1	33060197	BRI3BP	Low-evidence
nsp13	Q12965	MERS	0.157137	1	0	1	33060197	MYO1E	Low-evidence
nsp13	Q8WXW3	SARS_CoV_1	0.156105	1	0	1	33060197	PIBF1	Low-evidence
nsp13	Q12965	SARS_CoV_1	0.153042	1	0	1	33060197	MYO1E	Low-evidence
nsp7	Q8N9F7	MERS	0.153042	1	0	1	33060197	GDPD1	Low-evidence
nsp12	O95391	SARS_CoV_1	0.153042	1	1	2	33060197;38235848	SLU7	High-evidence
nsp2	Q96A26	MERS	0.152032	1	0	1	33060197	FAM162A	Low-evidence
nsp14	P12268	SARS_CoV_1	0.147065	1	0	1	33060197	IMPDH2	Low-evidence
nsp13	Q16881	MERS	0.146087	1	0	1	33060197	TXNRD1	Low-evidence
nsp2	Q15650	MERS	0.146087	1	0	1	33060197	TRIP4	Low-evidence
nsp4	Q96S52	MERS	0.144149	1	0	1	33060197	PIGS	Low-evidence
orf9b	P35813	SARS_CoV_1	0.144149	1	0	1	33060197	PPM1A	Low-evidence
M	Q9NVI1	SARS_CoV_1	0.143188	1	0	1	33060197	FANCI	Low-evidence
orf10	Q9BU02	SARS_CoV_2	0.142232	2	0	2	32353859;33060197	THTPA	Medium-evidence
nsp13	Q5VU43	MERS	0.141281	1	0	1	33060197	PDE4DIP	Low-evidence
orf3	Q9NQH7	MERS	0.137532	2	0	2	33060197;35032548	XPNPEP3	Medium-evidence
nsp9	Q96PM5	MERS	0.137532	1	0	1	33060197	RCHY1	Low-evidence
orf3	P27361	MERS	0.136608	1	0	1	33060197	MAPK3	Low-evidence
nsp9	O00142	SARS_CoV_1	0.13569	1	0	1	33060197	TK2	Low-evidence
nsp9	Q99567	SARS_CoV_2	0.13569	2	1	3	32353859;33060197;37483225	NUP88	High-evidence
orf8	Q9BRN9	SARS_CoV_2	0.134776	2	0	2	32353859;33060197	TM2D3	Medium-evidence
nsp8	Q9ULT8	SARS_CoV_1	0.133867	1	0	1	33060197	HECTD1	Low-evidence
nsp10	Q969X5	SARS_CoV_1	0.132066	1	0	1	33060197	ERGIC1	Low-evidence
S	Q9C0B5	SARS_CoV_2	0.131173	22	1	23	32353859;33060197;33845483;34597346;34961524;35337019;36217030;37478010;38569033;888800000082;888800000104;888800000817	ZDHHC5	High-evidence
nsp7	Q8WUY8	SARS_CoV_1	0.131173	1	0	1	33060197	NAT14	Low-evidence
M	Q96HR9	SARS_CoV_2	0.130285	6	0	6	32353859;33060197;40593736;888800000082;888800000817	REEP6	Medium-evidence
nsp16	Q9GZQ3	SARS_CoV_2	0.129403	1	0	1	33060197	COMMD5	Low-evidence
nsp2	Q2M389	SARS_CoV_2	0.127653	5	0	5	32353859;33060197;36217030;40593736;888800000303	WASHC4	Medium-evidence
orf8	Q7Z4H8	SARS_CoV_2	0.126785	4	0	4	32353859;33060197;34597346;888800000104	POGLUT3	Medium-evidence
nsp2	O14975	SARS_CoV_2	0.123366	4	0	4	32353859;33060197;34709727;888800000303	SLC27A2	Medium-evidence
M	Q6AI08	SARS_CoV_1	0.123366	1	0	1	33060197	HEATR6	Low-evidence
nsp13	A7MCY6	SARS_CoV_2	0.123366	2	0	2	32353859;33060197	TBKBP1	Medium-evidence
nsp16	Q70EL1	SARS_CoV_2	0.122523	3	0	3	33060197;34672954;888800000104	USP54	Medium-evidence
nsp13	Q9UM54	SARS_CoV_1	0.121686	1	0	1	33060197	MYO6	Low-evidence
M	Q9Y312	SARS_CoV_2	0.120853	3	0	3	32353859;33060197;888800000817	AAR2	Medium-evidence
nsp10	Q9BZH6	MERS	0.120853	1	0	1	33060197	WDR11	Low-evidence
nsp13	P35579	MERS	0.120853	1	0	1	33060197	MYH9	Low-evidence
nsp7	Q6P1M0	MERS	0.120026	1	0	1	33060197	SLC27A4	Low-evidence
nsp8	Q16531	MERS	0.120026	1	0	1	33060197	DDB1	Low-evidence
M	Q969V3	SARS_CoV_1	0.119203	1	0	1	33060197	NCLN	Low-evidence
nsp9	P61962	SARS_CoV_1	0.119203	1	0	1	33060197	DCAF7	Low-evidence
nsp2	Q96D09	MERS	0.115961	1	0	1	33060197	GPRASP2	Low-evidence
M	Q15386	SARS_CoV_1	0.115961	1	0	1	33060197	UBE3C	Low-evidence
nsp2	Q5T1M5	SARS_CoV_2	0.115961	8	0	8	32353859;33060197;34159380;34672954;888800000082;888800000104;888800000109;888800000303	FKBP15	Medium-evidence
nsp13	Q08379	SARS_CoV_1	0.115961	1	0	1	33060197	GOLGA2	Low-evidence
nsp8	Q96B26	SARS_CoV_1	0.114369	1	0	1	33060197	EXOSC8	Low-evidence
nsp13	P13861	SARS_CoV_1	0.114369	1	0	1	33060197	PRKAR2A	Low-evidence
orf6	P52948	SARS_CoV_1	0.114369	1	2	3	33060197;33849972;35970938	NUP98	High-evidence
orf8	Q13438	SARS_CoV_2	0.114369	4	1	5	32353859;33060197;34597346;37483225;888800000104	OS9	High-evidence
nsp7	P51149	SARS_CoV_2	0.111241	10	1	11	32353859;33060197;34709727;36225252;38172120;38448435;39147351;40593736;888800000109	RAB7A	High-evidence
M	Q9BQ95	SARS_CoV_1	0.109706	1	0	1	33060197	ECSIT	Low-evidence
M	Q96HW7	SARS_CoV_2	0.108189	5	0	5	32353859;33060197;33845483;37201587;888800000082	INTS4	Medium-evidence
M	Q9H583	MERS	0.108189	1	0	1	33060197	HEATR1	Low-evidence
orf8	O76061	SARS_CoV_2	0.106691	3	0	3	32353859;33060197;34597346	STC2	Medium-evidence
nsp12	Q4KMZ1	SARS_CoV_1	0.106691	1	0	1	33060197	IQCC	Low-evidence
nsp13	Q9UPN4	SARS_CoV_1	0.106691	1	0	1	33060197	CEP131	Low-evidence
orf8	P26358	SARS_CoV_2	0.106691	3	0	3	32353859;33060197;888800000817	DNMT1	Medium-evidence
nsp16	Q9UKF6	SARS_CoV_1	0.106691	1	0	1	33060197	CPSF3	Low-evidence
nsp8	Q96I59	SARS_CoV_2	0.106691	2	0	2	32353859;33060197	NARS2	Medium-evidence
orf9b	Q9UNE7	SARS_CoV_1	0.105211	1	0	1	33060197	STUB1	Low-evidence
M	O60779	SARS_CoV_1	0.105211	1	0	1	33060197	SLC19A2	Low-evidence
nsp2	O00746	MERS	0.103749	1	0	1	33060197	NME4	Low-evidence
nsp4	P62699	SARS_CoV_1	0.103749	1	0	1	33060197	YPEL5	Low-evidence
nsp8	O60287	MERS	0.102305	1	0	1	33060197	URB1	Low-evidence
nsp7	P00387	SARS_CoV_1	0.102305	1	0	1	33060197	CYB5R3	Low-evidence
nsp13	P09493	SARS_CoV_1	0.102305	1	0	1	33060197	TPM1	Low-evidence
nsp13	P13861	MERS	0.100879	1	0	1	33060197	PRKAR2A	Low-evidence
M	O94829	SARS_CoV_1	0.100879	1	0	1	33060197	IPO13	Low-evidence
M	Q92604	SARS_CoV_1	0.100879	1	0	1	33060197	LPGAT1	Low-evidence
nsp13	Q9H0E2	SARS_CoV_1	0.100879	1	0	1	33060197	TOLLIP	Low-evidence
nsp14	P06280	SARS_CoV_2	0.100879	3	1	4	32353859;33060197;36095012;37483225	GLA	High-evidence
nsp7	P62820	SARS_CoV_2	0.0994702	6	1	7	32353859;33060197;36225252;37112806;38777146;39147351;40593736	RAB1A	High-evidence
nsp13	Q66GS9	SARS_CoV_1	0.0994702	1	0	1	33060197	CEP135	Low-evidence
nsp14	P12268	SARS_CoV_2	0.0980793	9	3	12	32353859;33060197;33080218;34780058;36095012;36177032;38777146;39147351;40593736;888800000310;888800000817	IMPDH2	High-evidence
nsp16	Q8TEM1	SARS_CoV_2	0.0967058	4	0	4	33060197;40593736;888800000109	NUP210	Medium-evidence
M	Q8NEW0	SARS_CoV_2	0.0967058	6	1	7	32353859;33060197;34709727;37483225;38569033;888800000109	SLC30A7	High-evidence
orf6	Q96AQ6	SARS_CoV_1	0.0967058	1	0	1	33060197	PBXIP1	Low-evidence
nsp13	P14649	MERS	0.0967058	1	0	1	33060197	MYL6B	Low-evidence
M	Q96CW5	SARS_CoV_2	0.0953495	2	0	2	32353859;33060197	TUBGCP3	Medium-evidence
M	P56589	SARS_CoV_1	0.0953495	1	0	1	33060197	PEX3	Low-evidence
nsp2	P16435	MERS	0.0940102	1	0	1	33060197	POR	Low-evidence
nsp10	Q6Q0C0	SARS_CoV_1	0.0926878	1	0	1	33060197	TRAF7	Low-evidence
N	P67870	SARS_CoV_1	0.0926878	1	0	1	33060197	CSNK2B	Low-evidence
orf8	P29122	SARS_CoV_2	0.0926878	4	0	4	32353859;33060197;34597346;888800000104	PCSK6	Medium-evidence
nsp13	P17612	MERS	0.090093	1	0	1	33060197	PRKACA	Low-evidence
M	P13804	SARS_CoV_2	0.090093	14	0	14	32353859;33060197;34709727;34901782;36575184;40593736;888800000082;888800000104	ETFA	Medium-evidence
E	Q92665	SARS_CoV_1	0.0888203	1	0	1	33060197	MRPS31	Low-evidence
nsp13	O60784	SARS_CoV_1	0.0888203	1	0	1	33060197	TOM1	Low-evidence
nsp14	P06280	SARS_CoV_1	0.0875638	1	0	1	33060197	GLA	Low-evidence
nsp13	Q6ZVM7	SARS_CoV_1	0.0875638	1	0	1	33060197	TOM1L2	Low-evidence
M	Q9P2R7	SARS_CoV_1	0.0863235	1	0	1	33060197	SUCLA2	Low-evidence
nsp8	Q13206	SARS_CoV_2	0.085099	4	0	4	32353859;33060197;38172120;888800000168	DDX10	Medium-evidence
M	Q9H845	SARS_CoV_1	0.0838904	1	0	1	33060197	ACAD9	Low-evidence
nsp8	Q76FK4	MERS	0.0838904	1	0	1	33060197	NOL8	Low-evidence
nsp8	Q15050	MERS	0.0838904	1	0	1	33060197	RRS1	Low-evidence
M	Q8TEM1	MERS	0.0815198	1	0	1	33060197	NUP210	Low-evidence
M	Q9BTY2	SARS_CoV_1	0.0815198	1	0	1	33060197	FUCA2	Low-evidence
M	Q9H0V9	MERS	0.0803575	1	0	1	33060197	LMAN2L	Low-evidence
nsp13	Q15154	SARS_CoV_1	0.0803575	1	0	1	33060197	PCM1	Low-evidence
nsp7	Q13724	SARS_CoV_2	0.0780782	5	0	5	32353859;33060197;34709727;38777146;40593736	MOGS	Medium-evidence
nsp16	Q8IUD2	SARS_CoV_1	0.0780782	1	0	1	33060197	ERC1	Low-evidence
nsp7	Q8WUY8	SARS_CoV_2	0.0758582	2	0	2	32353859;33060197	NAT14	Medium-evidence
M	P27105	SARS_CoV_2	0.0758582	10	0	10	32353859;33060197;38569033;40593736;888800000104;888800000109	STOM	Medium-evidence
M	Q15043	SARS_CoV_1	0.0758582	1	0	1	33060197	SLC39A14	Low-evidence
M	P33527	SARS_CoV_1	0.0736963	2	0	2	33060197;37499664	ABCC1	Medium-evidence
M	Q8TBF5	SARS_CoV_1	0.0726367	1	0	1	33060197	PIGX	Low-evidence
M	Q9NVI1	MERS	0.0726367	2	0	2	33060197;35032548	FANCI	Medium-evidence
nsp2	Q99613	MERS	0.0726367	1	0	1	33060197	EIF3C	Low-evidence
M	Q9C0E2	SARS_CoV_1	0.0715912	1	0	1	33060197	XPO4	Low-evidence
nsp2	Q8N3C0	MERS	0.0715912	1	0	1	33060197	ASCC3	Low-evidence
nsp4	Q8TEM1	SARS_CoV_2	0.0715912	6	0	6	32353859;33060197;37768083;40593736;888800000109	NUP210	Medium-evidence
M	Q9H583	SARS_CoV_1	0.0715912	1	0	1	33060197	HEATR1	Low-evidence
nsp16	P51530	SARS_CoV_2	0.0715912	3	0	3	33060197;38777146;888800000082	DNA2	Medium-evidence
N	O43818	SARS_CoV_1	0.0705596	1	0	1	33060197	RRP9	Low-evidence
nsp2	Q13423	MERS	0.0705596	1	0	1	33060197	NNT	Low-evidence
nsp13	O14908	SARS_CoV_1	0.0695417	1	0	1	33060197	GIPC1	Low-evidence
nsp7	Q8N2K0	MERS	0.0685375	1	0	1	33060197	ABHD12	Low-evidence
nsp9	P37198	SARS_CoV_2	0.0685375	5	1	6	32353859;33060197;34597346;34844119;40593736;888800000833	NUP62	High-evidence
nsp7	O95573	SARS_CoV_2	0.0685375	9	0	9	32353859;33060197;34709727;38043095;40593736;888800000104;888800000109;888800000956	ACSL3	Medium-evidence
nsp8	P61011	SARS_CoV_2	0.0675467	5	0	5	32353859;33060197;34597346;39147351;40593736	SRP54	Medium-evidence
M	O15321	SARS_CoV_1	0.0675467	1	0	1	33060197	TM9SF1	Low-evidence
N	P19784	SARS_CoV_1	0.0675467	1	0	1	33060197	CSNK2A2	Low-evidence
orf4a	Q4G0J3	MERS	0.0675467	1	0	1	33060197	LARP7	Low-evidence
nsp13	Q76N32	SARS_CoV_2	0.0665692	2	0	2	32353859;33060197	CEP68	Medium-evidence
nsp13	P31323	MERS	0.0665692	1	0	1	33060197	PRKAR2B	Low-evidence
nsp15	P62330	SARS_CoV_1	0.0656048	1	0	1	33060197	ARF6	Low-evidence
nsp16	Q6IEG0	SARS_CoV_2	0.0656048	1	0	1	33060197	SNRNP48	Low-evidence
orf8	Q96IV0	SARS_CoV_2	0.0646535	2	1	3	32353859;33060197;37483225	NGLY1	High-evidence
nsp8	Q9NQT4	SARS_CoV_2	0.0646535	3	0	3	32353859;33060197;36241425	EXOSC5	Medium-evidence
M	Q9ULF5	SARS_CoV_1	0.063715	2	0	2	33060197;37499664	SLC39A10	Medium-evidence
nsp16	Q9Y2K2	SARS_CoV_2	0.063715	2	0	2	33060197;38777146	SIK3	Medium-evidence
M	Q96EC8	MERS	0.063715	1	0	1	33060197	YIPF6	Low-evidence
M	P38435	SARS_CoV_1	0.063715	1	0	1	33060197	GGCX	Low-evidence
N	P68400	MERS	0.063715	1	0	1	33060197	CSNK2A1	Low-evidence
orf3	Q9UBE0	MERS	0.061876	2	0	2	33060197;35032548	SAE1	Medium-evidence
M	Q9BYC5	MERS	0.0609752	1	0	1	33060197	FUT8	Low-evidence
nsp16	Q9UKF6	SARS_CoV_2	0.0600867	6	0	6	33060197;34672954;34709727;35652658;37314180;888800000082	CPSF3	Medium-evidence
M	Q5H8A4	SARS_CoV_1	0.0600867	1	0	1	33060197	PIGG	Low-evidence
M	Q9Y6E2	SARS_CoV_2	0.0600867	3	0	3	32353859;33060197;40593736	BZW2	Medium-evidence
orf8	P15151	SARS_CoV_2	0.0592103	3	0	3	32353859;33060197;888800000817	PVR	Medium-evidence
nsp16	A3KMH1	MERS	0.0592103	1	0	1	33060197	VWA8	Low-evidence
nsp16	Q96HP0	SARS_CoV_2	0.0583458	1	0	1	33060197	DOCK6	Low-evidence
N	O76021	SARS_CoV_1	0.0583458	1	0	1	33060197	RSL1D1	Low-evidence
nsp16	Q5SVZ6	SARS_CoV_1	0.0574933	1	0	1	33060197	ZMYM1	Low-evidence
nsp8	Q9UHG3	MERS	0.0574933	1	0	1	33060197	PCYOX1	Low-evidence
nsp10	Q969X5	SARS_CoV_2	0.0566524	2	0	2	32353859;33060197	ERGIC1	Medium-evidence
N	Q9HCE1	SARS_CoV_1	0.0566524	1	1	2	33060197;34517762	MOV10	High-evidence
orf8	O14656	SARS_CoV_2	0.0566524	3	1	4	32353859;33060197;37483225;888800000104	TOR1A	High-evidence
nsp13	P28289	SARS_CoV_1	0.0558231	1	0	1	33060197	TMOD1	Low-evidence
nsp8	Q96B26	SARS_CoV_2	0.0558231	3	0	3	32353859;33060197;36241425	EXOSC8	Medium-evidence
nsp16	Q6GYQ0	SARS_CoV_2	0.0550053	4	0	4	33060197;34672954;888800000082;888800000104	RALGAPA1	Medium-evidence
M	Q5T1Q4	SARS_CoV_1	0.0550053	1	0	1	33060197	SLC35F1	Low-evidence
nsp14	P63151	MERS	0.0550053	1	0	1	33060197	PPP2R2A	Low-evidence
M	Q9H2J7	SARS_CoV_1	0.0550053	1	0	1	33060197	SLC6A15	Low-evidence
orf3	P13489	MERS	0.0541987	2	0	2	33060197;35032548	RNH1	Medium-evidence
M	P38435	SARS_CoV_2	0.0541987	3	0	3	32353859;33060197;888800000104	GGCX	Medium-evidence
M	O95864	SARS_CoV_1	0.0534033	1	0	1	33060197	FADS2	Low-evidence
nsp8	Q9NQT5	SARS_CoV_2	0.0534033	7	0	7	32353859;33060197;36241425;38043095;39066279;40593736;888800000956	EXOSC3	Medium-evidence
orf4a	O00566	MERS	0.052619	1	0	1	33060197	MPHOSPH10	Low-evidence
M	Q96CW5	SARS_CoV_1	0.052619	1	0	1	33060197	TUBGCP3	Low-evidence
M	Q7L8L6	SARS_CoV_1	0.052619	1	0	1	33060197	FASTKD5	Low-evidence
M	Q6PJG6	SARS_CoV_1	0.0518455	1	0	1	33060197	BRAT1	Low-evidence
nsp7	O94766	SARS_CoV_1	0.0518455	1	0	1	33060197	B3GAT3	Low-evidence
M	Q9Y4R8	MERS	0.0518455	1	0	1	33060197	TELO2	Low-evidence
M	Q8N1F8	SARS_CoV_1	0.0510827	1	0	1	33060197	STK11IP	Low-evidence
nsp2	P16435	SARS_CoV_2	0.0503306	7	0	7	32353859;33060197;34709727;36225252;888800000104;888800000109;888800000303	POR	Medium-evidence
nsp13	P06396	SARS_CoV_1	0.0503306	1	0	1	33060197	GSN	Low-evidence
nsp7	Q9Y5J7	MERS	0.0503306	1	0	1	33060197	TIMM9	Low-evidence
M	Q9H7F0	SARS_CoV_1	0.0503306	1	0	1	33060197	ATP13A3	Low-evidence
orf8	P61916	SARS_CoV_2	0.0503306	5	0	5	32353859;33060197;34597346;888800000104;888800000817	NPC2	Medium-evidence
nsp13	Q9UPQ0	SARS_CoV_1	0.0503306	1	0	1	33060197	LIMCH1	Low-evidence
orf4a	Q9UPY3	MERS	0.0503306	1	0	1	33060197	DICER1	Low-evidence
nsp2	Q9UPQ9	MERS	0.049589	1	0	1	33060197	TNRC6B	Low-evidence
M	Q92616	MERS	0.049589	2	0	2	33060197;35032548	GCN1	Medium-evidence
M	Q7Z3U7	SARS_CoV_1	0.049589	1	0	1	33060197	MON2	Low-evidence
E	O15270	MERS	0.0488578	1	0	1	33060197	SPTLC2	Low-evidence
M	Q9UKV5	SARS_CoV_1	0.0488578	1	0	1	33060197	AMFR	Low-evidence
nsp2	Q9HD20	MERS	0.0481368	1	0	1	33060197	ATP13A1	Low-evidence
nsp13	O95613	SARS_CoV_1	0.0481368	1	0	1	33060197	PCNT	Low-evidence
nsp16	Q9P209	MERS	0.0474259	1	0	1	33060197	CEP72	Low-evidence
M	Q8WUD6	SARS_CoV_1	0.046725	1	0	1	33060197	CHPT1	Low-evidence
nsp8	Q9NTK5	MERS	0.046725	1	0	1	33060197	OLA1	Low-evidence
nsp2	P15954	MERS	0.046725	1	0	1	33060197	COX7C	Low-evidence
nsp7	P63218	SARS_CoV_2	0.0460339	2	0	2	32353859;33060197	GNG5	Medium-evidence
orf8	Q08431	SARS_CoV_2	0.0453526	3	0	3	32353859;33060197;888800000104	MFGE8	Medium-evidence
nsp1	P42345	MERS	0.0453526	1	0	1	33060197	MTOR	Low-evidence
M	P24390	SARS_CoV_1	0.0446809	1	0	1	33060197	KDELR1	Low-evidence
nsp4	Q9Y5J6	SARS_CoV_2	0.0446809	2	0	2	32353859;33060197	TIMM10B	Medium-evidence
nsp8	Q9HD40	SARS_CoV_2	0.0440186	3	0	3	32353859;33060197;40593736	SEPSECS	Medium-evidence
nsp8	Q92552	SARS_CoV_2	0.0440186	4	1	5	32353859;33060197;37314180;37483225;888800000817	MRPS27	High-evidence
nsp7	P00387	SARS_CoV_2	0.0440186	8	0	8	32353859;33060197;34709727;36225252;39147351;40593736	CYB5R3	Medium-evidence
nsp8	Q14146	MERS	0.0433658	1	0	1	33060197	URB2	Low-evidence
nsp8	Q9NQT5	SARS_CoV_1	0.0433658	1	0	1	33060197	EXOSC3	Low-evidence
nsp1	Q05516	MERS	0.0433658	1	0	1	33060197	ZBTB16	Low-evidence
nsp16	Q8TEM1	SARS_CoV_1	0.0433658	1	0	1	33060197	NUP210	Low-evidence
nsp16	Q15345	SARS_CoV_2	0.0427222	2	0	2	33060197;38777146	LRRC41	Medium-evidence
orf3a	Q8N6S5	SARS_CoV_2	0.0427222	3	0	3	32353859;32838362;33060197	ARL6IP6	Medium-evidence
nsp15	Q9H4P4	SARS_CoV_2	0.0427222	2	0	2	32353859;33060197	RNF41	Medium-evidence
nsp10	Q96CW1	SARS_CoV_2	0.0420877	6	1	7	32353859;33060197;34709727;34799561;40593736;888800000104	AP2M1	High-evidence
M	Q6P3X3	SARS_CoV_1	0.0420877	1	0	1	33060197	TTC27	Low-evidence
M	O94822	SARS_CoV_1	0.0420877	1	0	1	33060197	LTN1	Low-evidence
nsp14	Q5QP82	MERS	0.0420877	1	0	1	33060197	DCAF10	Low-evidence
orf7a	Q9Y263	SARS_CoV_1	0.0414623	1	0	1	33060197	PLAA	Low-evidence
N	Q9Y3U8	SARS_CoV_1	0.0414623	1	0	1	33060197	RPL36	Low-evidence
nsp9	Q9BU61	MERS	0.0414623	1	0	1	33060197	NDUFAF3	Low-evidence
nsp16	Q9Y305	MERS	0.0408457	1	0	1	33060197	ACOT9	Low-evidence
nsp4	Q92643	MERS	0.0402379	1	0	1	33060197	PIGK	Low-evidence
M	Q13433	SARS_CoV_1	0.0402379	2	0	2	33060197;37499664	SLC39A6	Medium-evidence
nsp2	Q5SZL2	MERS	0.0396388	1	0	1	33060197	CEP85L	Low-evidence
orf7a	O75691	SARS_CoV_1	0.0396388	1	0	1	33060197	UTP20	Low-evidence
orf4b	Q07021	MERS	0.0390483	1	0	1	33060197	C1QBP	Low-evidence
nsp2	Q10471	MERS	0.0390483	1	0	1	33060197	GALNT2	Low-evidence
N	Q86U42	SARS_CoV_1	0.0390483	1	0	1	33060197	PABPN1	Low-evidence
nsp13	Q9Y608	SARS_CoV_1	0.0384662	1	0	1	33060197	LRRFIP2	Low-evidence
nsp16	Q6PJI9	MERS	0.0384662	1	0	1	33060197	WDR59	Low-evidence
N	Q15435	MERS	0.0378924	1	0	1	33060197	PPP1R7	Low-evidence
M	Q9H8M5	SARS_CoV_1	0.0378924	1	0	1	33060197	CNNM2	Low-evidence
M	P43003	SARS_CoV_1	0.0378924	1	0	1	33060197	SLC1A3	Low-evidence
nsp14	Q5T9A4	MERS	0.0378924	1	0	1	33060197	ATAD3B	Low-evidence
M	Q6PML9	SARS_CoV_2	0.0378924	5	1	6	32353859;33060197;37483225;38569033;888800000109	SLC30A9	High-evidence
orf8	Q9NXK8	SARS_CoV_2	0.0378924	2	1	3	32353859;33060197;36071039	FBXL12	High-evidence
orf9b	Q14192	SARS_CoV_1	0.0378924	1	0	1	33060197	FHL2	Low-evidence
nsp13	Q15154	MERS	0.0373269	1	0	1	33060197	PCM1	Low-evidence
nsp14	Q96EN8	MERS	0.0367695	1	0	1	33060197	MOCOS	Low-evidence
orf9b	Q9UL15	SARS_CoV_1	0.0356786	1	0	1	33060197	BAG5	Low-evidence
nsp16	P51659	MERS	0.0351448	1	0	1	33060197	HSD17B4	Low-evidence
nsp16	Q96RU2	MERS	0.0351448	1	0	1	33060197	USP28	Low-evidence
nsp9	P49419	MERS	0.0351448	1	0	1	33060197	ALDH7A1	Low-evidence
nsp13	O14639	SARS_CoV_1	0.0346188	1	0	1	33060197	ABLIM1	Low-evidence
M	Q9BW92	SARS_CoV_2	0.0346188	5	0	5	32353859;33060197;37929963;888800000082;888800000817	TARS2	Medium-evidence
nsp16	Q92995	MERS	0.0346188	1	0	1	33060197	USP13	Low-evidence
nsp7	Q5JTV8	SARS_CoV_2	0.0341004	6	0	6	32353859;33060197;34709727;40593736;888800000104;888800000109	TOR1AIP1	Medium-evidence
orf6	P35658	SARS_CoV_1	0.0335895	1	0	1	33060197	NUP214	Low-evidence
E	Q5T9L3	MERS	0.033086	1	0	1	33060197	WLS	Low-evidence
M	Q4KMQ2	SARS_CoV_2	0.033086	8	0	8	32353859;33060197;38569033;888800000104;888800000109;888800000817	ANO6	Medium-evidence
nsp13	Q8WWI1	SARS_CoV_1	0.033086	1	0	1	33060197	LMO7	Low-evidence
M	P20020	SARS_CoV_1	0.033086	1	0	1	33060197	ATP2B1	Low-evidence
nsp9	P21281	MERS	0.0325897	1	0	1	33060197	ATP6V1B2	Low-evidence
nsp6	Q9H7F0	SARS_CoV_2	0.0321007	6	0	6	32353859;33060197;33845483;37768083;888800000082;888800000168	ATP13A3	Medium-evidence
orf9b	O75534	SARS_CoV_2	0.0321007	3	0	3	32353859;33060197;888800000817	CSDE1	Medium-evidence
nsp16	P11717	MERS	0.0321007	1	0	1	33060197	IGF2R	Low-evidence
nsp7	Q2TAA5	SARS_CoV_1	0.0321007	1	0	1	33060197	ALG11	Low-evidence
M	Q5T9L3	SARS_CoV_1	0.0316188	1	0	1	33060197	WLS	Low-evidence
nsp16	Q96II8	SARS_CoV_2	0.0311438	1	0	1	33060197	LRCH3	Low-evidence
nsp9	P38606	MERS	0.0311438	1	0	1	33060197	ATP6V1A	Low-evidence
orf6	Q9BWH2	SARS_CoV_1	0.0306758	1	0	1	33060197	FUNDC2	Low-evidence
orf9b	P27448	SARS_CoV_1	0.0306758	2	0	2	22046132;33060197	MARK3	Medium-evidence
nsp16	Q567U6	SARS_CoV_1	0.0306758	1	0	1	33060197	CCDC93	Low-evidence
M	P48556	SARS_CoV_2	0.0302146	2	2	4	32353859;33060197;33111431;34672947	PSMD8	High-evidence
nsp4	P14735	SARS_CoV_1	0.0302146	1	0	1	33060197	IDE	Low-evidence
nsp8	Q7L2J0	SARS_CoV_2	0.0302146	2	0	2	32353859;33060197	MEPCE	Medium-evidence
orf7a	O14787	SARS_CoV_1	0.0302146	1	0	1	33060197	TNPO2	Low-evidence
nsp2	P52306	SARS_CoV_1	0.0297601	1	0	1	33060197	RAP1GDS1	Low-evidence
M	P98194	SARS_CoV_1	0.0297601	1	0	1	33060197	ATP2C1	Low-evidence
orf8	P28300	SARS_CoV_2	0.0297601	2	1	3	32353859;33060197;37483225	LOX	High-evidence
nsp8	P09132	SARS_CoV_2	0.0297601	5	0	5	32353859;33060197;34578187;888800000082;888800000817	SRP19	Medium-evidence
nsp8	Q9H6F5	SARS_CoV_1	0.0297601	1	0	1	33060197	CCDC86	Low-evidence
M	O15431	SARS_CoV_1	0.0293122	2	0	2	33060197;37499664	SLC31A1	Medium-evidence
nsp4	Q969N2	MERS	0.0293122	1	0	1	33060197	PIGT	Low-evidence
orf7a	Q92616	SARS_CoV_1	0.0293122	1	0	1	33060197	GCN1	Low-evidence
orf7a	P42345	SARS_CoV_1	0.0293122	1	0	1	33060197	MTOR	Low-evidence
N	P68400	SARS_CoV_1	0.0288709	1	0	1	33060197	CSNK2A1	Low-evidence
orf3a	Q9H270	SARS_CoV_2	0.0288709	8	3	11	32353859;33060197;33845483;34232536;34709727;35337019;36217030;38448435;888800000168	VPS11	High-evidence
M	Q86UL3	SARS_CoV_1	0.0288709	1	0	1	33060197	GPAT4	Low-evidence
M	Q9BSJ2	SARS_CoV_1	0.0288709	1	0	1	33060197	TUBGCP2	Low-evidence
nsp7	O94766	MERS	0.028436	1	0	1	33060197	B3GAT3	Low-evidence
nsp14	Q9NQX3	MERS	0.028436	1	0	1	33060197	GPHN	Low-evidence
nsp2	O00186	MERS	0.0280075	1	0	1	33060197	STXBP3	Low-evidence
M	Q68DH5	MERS	0.0280075	1	0	1	33060197	LMBRD2	Low-evidence
N	Q13310	SARS_CoV_1	0.0280075	1	1	2	33060197;34612687	PABPC4	High-evidence
nsp7	P61106	SARS_CoV_2	0.0280075	4	0	4	32353859;33060197;39147351;888800000104	RAB14	Medium-evidence
M	O95674	SARS_CoV_1	0.0280075	1	0	1	33060197	CDS2	Low-evidence
N	P16989	SARS_CoV_1	0.0280075	1	0	1	33060197	YBX3	Low-evidence
nsp8	Q8IY37	SARS_CoV_1	0.0280075	1	0	1	33060197	DHX37	Low-evidence
nsp13	P14649	SARS_CoV_1	0.0280075	1	0	1	33060197	MYL6B	Low-evidence
nsp7	Q8NBX0	SARS_CoV_1	0.0280075	1	0	1	33060197	SCCPDH	Low-evidence
nsp4	Q8NFQ8	MERS	0.0271692	1	0	1	33060197	TOR1AIP2	Low-evidence
N	P19784	MERS	0.0271692	1	0	1	33060197	CSNK2A2	Low-evidence
nsp8	Q8TC07	MERS	0.0271692	1	0	1	33060197	TBC1D15	Low-evidence
nsp8	Q9H6R4	MERS	0.0267593	1	0	1	33060197	NOL6	Low-evidence
M	O43156	SARS_CoV_1	0.0267593	1	0	1	33060197	TTI1	Low-evidence
orf9b	Q9UHD1	SARS_CoV_1	0.0267593	1	0	1	33060197	CHORDC1	Low-evidence
nsp16	Q5SZL2	SARS_CoV_2	0.0267593	2	0	2	33060197;40593736	CEP85L	Medium-evidence
M	O75027	SARS_CoV_1	0.0267593	1	0	1	33060197	ABCB7	Low-evidence
nsp8	Q03701	MERS	0.0267593	1	0	1	33060197	CEBPZ	Low-evidence
nsp2	Q9UH62	MERS	0.0263554	1	0	1	33060197	ARMCX3	Low-evidence
nsp8	Q9NQT4	SARS_CoV_1	0.0263554	1	0	1	33060197	EXOSC5	Low-evidence
orf4b	Q9Y2E5	MERS	0.0259574	1	0	1	33060197	MAN2B2	Low-evidence
nsp13	O95684	SARS_CoV_1	0.0255652	1	0	1	33060197	CEP43	Low-evidence
nsp4	Q7L5Y9	SARS_CoV_1	0.0255652	1	0	1	33060197	MAEA	Low-evidence
orf7a	P46459	SARS_CoV_1	0.0251788	2	0	2	33060197;33845483	NSF	Medium-evidence
nsp4	Q9H871	SARS_CoV_1	0.0251788	1	0	1	33060197	RMND5A	Low-evidence
nsp13	Q04724	SARS_CoV_1	0.0251788	1	0	1	33060197	TLE1	Low-evidence
nsp16	Q8IWR1	MERS	0.0251788	1	0	1	33060197	TRIM59	Low-evidence
nsp16	Q9UBV2	MERS	0.0251788	1	0	1	33060197	SEL1L	Low-evidence
M	O94822	MERS	0.0251788	1	0	1	33060197	LTN1	Low-evidence
nsp4	P13674	MERS	0.0251788	1	0	1	33060197	P4HA1	Low-evidence
nsp8	Q8NEJ9	SARS_CoV_1	0.0247982	1	0	1	33060197	NGDN	Low-evidence
orf4a	P49189	MERS	0.0247982	1	0	1	33060197	ALDH9A1	Low-evidence
M	Q9C0D9	SARS_CoV_1	0.0247982	1	0	1	33060197	SELENOI	Low-evidence
nsp13	Q04726	SARS_CoV_1	0.0244231	1	0	1	33060197	TLE3	Low-evidence
M	P23634	SARS_CoV_1	0.0244231	1	0	1	33060197	ATP2B4	Low-evidence
orf4b	O60930	MERS	0.0244231	1	0	1	33060197	RNASEH1	Low-evidence
nsp16	Q96IV0	MERS	0.0244231	1	0	1	33060197	NGLY1	Low-evidence
M	Q9Y5Y0	SARS_CoV_1	0.0240536	1	0	1	33060197	FLVCR1	Low-evidence
nsp4	Q8NBJ7	MERS	0.0240536	1	0	1	33060197	SUMF2	Low-evidence
nsp16	Q13438	MERS	0.0236895	1	0	1	33060197	OS9	Low-evidence
orf5	P02786	MERS	0.0236895	1	0	1	33060197	TFRC	Low-evidence
M	Q6P3X3	MERS	0.0236895	1	0	1	33060197	TTC27	Low-evidence
nsp2	O15372	SARS_CoV_1	0.0236895	1	0	1	33060197	EIF3H	Low-evidence
nsp7	Q6P1Q0	MERS	0.0236895	1	0	1	33060197	LETMD1	Low-evidence
nsp6	P25685	MERS	0.0233308	1	0	1	33060197	DNAJB1	Low-evidence
orf9b	Q15013	SARS_CoV_1	0.0229774	1	0	1	33060197	MAD2L1BP	Low-evidence
orf8	Q96MM7	SARS_CoV_2	0.0226292	2	0	2	32353859;33060197	HS6ST2	Medium-evidence
nsp2	O60573	SARS_CoV_2	0.0222862	6	5	11	32353859;33060197;34578187;34597346;34709727;35756894;35878012;36998012;888800000303	EIF4E2	High-evidence
nsp16	P54802	MERS	0.0222862	1	0	1	33060197	NAGLU	Low-evidence
orf8	Q13443	SARS_CoV_2	0.0219483	3	1	4	32353859;33060197;37318366;888800000104	ADAM9	High-evidence
orf9b	Q13643	SARS_CoV_1	0.0216153	1	0	1	33060197	FHL3	Low-evidence
nsp16	O95835	MERS	0.0216153	1	0	1	33060197	LATS1	Low-evidence
nsp4	P14735	SARS_CoV_2	0.0216153	5	0	5	32353859;33060197;37059927;888800000082;888800000817	IDE	Medium-evidence
nsp8	Q9NY61	SARS_CoV_1	0.0216153	1	0	1	33060197	AATF	Low-evidence
M	Q96AA3	SARS_CoV_1	0.0216153	1	0	1	33060197	RFT1	Low-evidence
nsp8	Q8N5D0	MERS	0.0216153	1	0	1	33060197	WDTC1	Low-evidence
nsp8	Q14692	SARS_CoV_1	0.0212874	1	0	1	33060197	BMS1	Low-evidence
nsp8	Q8NEJ9	SARS_CoV_2	0.0212874	2	0	2	32353859;33060197	NGDN	Medium-evidence
nsp16	Q9Y2S7	SARS_CoV_1	0.0212874	1	0	1	33060197	POLDIP2	Low-evidence
M	Q9BQT8	SARS_CoV_2	0.0209642	2	1	3	32353859;33060197;37483225	SLC25A21	High-evidence
nsp7	Q8NBX0	SARS_CoV_2	0.0209642	2	0	2	32353859;33060197	SCCPDH	Medium-evidence
M	Q99805	SARS_CoV_1	0.0209642	1	0	1	33060197	TM9SF2	Low-evidence
nsp2	Q6Y7W6	MERS	0.0206459	1	0	1	33060197	GIGYF2	Low-evidence
orf4a	P82914	MERS	0.0203324	1	0	1	33060197	MRPS15	Low-evidence
M	P35670	SARS_CoV_1	0.0203324	1	0	1	33060197	ATP7B	Low-evidence
nsp16	P43686	MERS	0.0200234	1	0	1	33060197	PSMC4	Low-evidence
nsp8	Q9UL40	SARS_CoV_1	0.0197191	1	0	1	33060197	ZNF346	Low-evidence
nsp4	Q2TAA5	SARS_CoV_2	0.0197191	5	0	5	32353859;33060197;888800000082;888800000104;888800000109	ALG11	Medium-evidence
nsp2	Q9UBQ5	SARS_CoV_1	0.0197191	1	0	1	33060197	EIF3K	Low-evidence
nsp13	O75381	SARS_CoV_1	0.0197191	1	0	1	33060197	PEX14	Low-evidence
E	Q8IWA5	SARS_CoV_2	0.0197191	2	0	2	32353859;33060197	SLC44A2	Medium-evidence
M	P49768	SARS_CoV_1	0.0197191	1	0	1	33060197	PSEN1	Low-evidence
M	Q13505	SARS_CoV_1	0.0197191	1	0	1	33060197	MTX1	Low-evidence
orf9b	O95817	SARS_CoV_1	0.019124	1	0	1	33060197	BAG3	Low-evidence
N	Q9BQ75	SARS_CoV_1	0.019124	1	0	1	33060197	CMSS1	Low-evidence
orf4b	P49790	MERS	0.019124	1	0	1	33060197	NUP153	Low-evidence
orf8a	Q8N766	SARS_CoV_1	0.0188331	1	0	1	33060197	EMC1	Low-evidence
orf5	Q96S66	MERS	0.0188331	1	0	1	33060197	CLCC1	Low-evidence
orf9b	P43686	SARS_CoV_1	0.0188331	1	0	1	33060197	PSMC4	Low-evidence
nsp8	Q9UGI8	SARS_CoV_1	0.0188331	1	0	1	33060197	TES	Low-evidence
nsp8	O95373	MERS	0.0188331	1	0	1	33060197	IPO7	Low-evidence
nsp2	Q7L2H7	SARS_CoV_1	0.0185466	1	1	2	19640993;33060197	EIF3M	High-evidence
orf7a	Q7Z4Q2	SARS_CoV_1	0.0185466	1	0	1	33060197	HEATR3	Low-evidence
M	Q9BSJ2	SARS_CoV_2	0.0185466	4	0	4	32353859;33060197;34672954;34709727	TUBGCP2	Medium-evidence
nsp4	Q9NVH1	SARS_CoV_2	0.0182643	4	1	5	32353859;33060197;37768083;40593736;888800000104	DNAJC11	High-evidence
nsp8	Q8IX01	MERS	0.0182643	1	0	1	33060197	SUGP2	Low-evidence
M	P11310	SARS_CoV_2	0.0179862	3	0	3	32353859;33060197;37929963	ACADM	Medium-evidence
nsp16	Q96DZ1	MERS	0.0179862	1	0	1	33060197	ERLEC1	Low-evidence
nsp8	O76094	SARS_CoV_2	0.0179862	10	0	10	32353859;33060197;34029587;35652658;37939376;38043095;38777146;39147351;40593736;888800000956	SRP72	Medium-evidence
orf10	P50897	SARS_CoV_2	0.0179862	2	0	2	32353859;33060197	PPT1	Medium-evidence
nsp4	P49257	MERS	0.0174425	1	0	1	33060197	LMAN1	Low-evidence
nsp2	Q6Y7W6	SARS_CoV_2	0.0174425	10	8	18	32353859;32838362;33060197;34709727;35756894;35878012;37732428;38043095;38777146;39147351;40593736;888800000303;888800000525;888800000956	GIGYF2	High-evidence
nsp8	Q13206	SARS_CoV_1	0.0174425	1	0	1	33060197	DDX10	Low-evidence
nsp8	Q15269	MERS	0.0174425	1	0	1	33060197	PWP2	Low-evidence
nsp8	Q12788	MERS	0.0169149	1	0	1	33060197	TBL3	Low-evidence
M	Q9NX47	MERS	0.0169149	1	0	1	33060197	MARCHF5	Low-evidence
nsp8	Q9BSC4	SARS_CoV_1	0.0169149	1	0	1	33060197	NOL10	Low-evidence
orf4b	Q9UKX7	MERS	0.0169149	1	0	1	33060197	NUP50	Low-evidence
nsp8	Q9NY61	SARS_CoV_2	0.0169149	3	0	3	32353859;33060197;34578187	AATF	Medium-evidence
nsp8	O15381	MERS	0.016403	1	0	1	33060197	NVL	Low-evidence
nsp8	P10644	MERS	0.016403	1	0	1	33060197	PRKAR1A	Low-evidence
E	O00203	SARS_CoV_2	0.016403	11	0	11	32353859;33060197;34780058;36217030;37314180;38043095;38777146;40593736;888800000956	AP3B1	Medium-evidence
orf4a	Q86W50	MERS	0.016403	1	0	1	33060197	METTL16	Low-evidence
orf8a	Q96HE7	SARS_CoV_1	0.016403	1	0	1	33060197	ERO1A	Low-evidence
nsp8	Q9GZL7	MERS	0.016403	1	0	1	33060197	WDR12	Low-evidence
nsp10	P28330	MERS	0.016403	1	0	1	33060197	ACADL	Low-evidence
orf4a	Q15434	MERS	0.0159064	1	0	1	33060197	RBMS2	Low-evidence
nsp8	Q7Z4Q2	MERS	0.0159064	1	0	1	33060197	HEATR3	Low-evidence
nsp7	O00116	SARS_CoV_2	0.0159064	4	0	4	32353859;33060197;34709727;39147351	AGPS	Medium-evidence
nsp13	Q96II8	SARS_CoV_1	0.0154246	1	0	1	33060197	LRCH3	Low-evidence
nsp8	P09132	SARS_CoV_1	0.0154246	1	0	1	33060197	SRP19	Low-evidence
nsp7	Q6P1Q0	SARS_CoV_1	0.0154246	1	0	1	33060197	LETMD1	Low-evidence
M	O95674	MERS	0.0154246	1	0	1	33060197	CDS2	Low-evidence
nsp4	Q9BSF4	SARS_CoV_2	0.0154246	4	0	4	32353859;33060197;38777146;888800000104	TIMM29	Medium-evidence
orf7a	Q5VYK3	SARS_CoV_1	0.0154246	1	0	1	33060197	ECPAS	Low-evidence
orf4a	Q9BXR0	MERS	0.0154246	1	0	1	33060197	QTRT1	Low-evidence
M	Q8WY22	SARS_CoV_1	0.0149571	1	0	1	33060197	BRI3BP	Low-evidence
M	Q13409	SARS_CoV_1	0.0149571	1	0	1	33060197	DYNC1I2	Low-evidence
nsp4	Q9NWU2	SARS_CoV_1	0.0149571	1	0	1	33060197	GID8	Low-evidence
M	Q8NDZ4	MERS	0.0149571	1	0	1	33060197	DIPK2A	Low-evidence
M	Q9UBU6	SARS_CoV_2	0.0145036	3	0	3	32353859;33060197;888800000109	FAM8A1	Medium-evidence
nsp2	Q13347	SARS_CoV_1	0.0145036	1	0	1	33060197	EIF3I	Low-evidence
nsp7	Q7LGA3	SARS_CoV_1	0.0145036	1	0	1	33060197	HS2ST1	Low-evidence
M	Q5BJH7	SARS_CoV_1	0.0145036	1	0	1	33060197	YIF1B	Low-evidence
orf9b	Q8NBA8	SARS_CoV_1	0.0145036	2	0	2	33060197;33845483	DTWD2	Medium-evidence
nsp2	Q9C037	SARS_CoV_1	0.0145036	1	0	1	33060197	TRIM4	Low-evidence
nsp4	Q9H7D7	SARS_CoV_1	0.0145036	1	0	1	33060197	WDR26	Low-evidence
nsp8	Q13206	MERS	0.0145036	1	0	1	33060197	DDX10	Low-evidence
nsp8	Q13823	MERS	0.0145036	1	0	1	33060197	GNL2	Low-evidence
nsp2	P55884	SARS_CoV_1	0.0145036	1	0	1	33060197	EIF3B	Low-evidence
orf9b	P27448	SARS_CoV_2	0.0140636	10	0	10	32353859;33060197;34597346;34709727;34901782;888800000082;888800000104;888800000109;888800000817	MARK3	Medium-evidence
M	Q8N5G2	SARS_CoV_1	0.0140636	1	0	1	33060197	MACO1	Low-evidence
nsp7	Q7LGA3	SARS_CoV_2	0.0140636	2	0	2	32353859;33060197	HS2ST1	Medium-evidence
M	Q9BSJ2	MERS	0.0140636	1	0	1	33060197	TUBGCP2	Low-evidence
nsp11	O14734	MERS	0.0140636	1	0	1	33060197	ACOT8	Low-evidence
nsp2	P60228	SARS_CoV_1	0.0136368	1	0	1	33060197	EIF3E	Low-evidence
orf9b	Q00341	SARS_CoV_1	0.0136368	1	0	1	33060197	HDLBP	Low-evidence
orf7a	Q9Y6E2	SARS_CoV_1	0.0136368	1	0	1	33060197	BZW2	Low-evidence
orf9b	O43633	SARS_CoV_2	0.0136368	2	0	2	32353859;33060197	CHMP2A	Medium-evidence
nsp7	Q5VT66	SARS_CoV_1	0.0136368	1	0	1	33060197	MTARC1	Low-evidence
nsp2	Q6NUN9	SARS_CoV_1	0.0136368	1	0	1	33060197	ZNF746	Low-evidence
nsp2	O00303	SARS_CoV_1	0.0132228	1	3	4	18231581;33060197	EIF3F	High-evidence
nsp4	Q96S59	SARS_CoV_1	0.0132228	1	0	1	33060197	RANBP9	Low-evidence
nsp7	Q8WUY8	MERS	0.0132228	1	0	1	33060197	NAT14	Low-evidence
nsp8	P42285	MERS	0.0128212	1	0	1	33060197	MTREX	Low-evidence
nsp4	Q13586	MERS	0.0128212	1	0	1	33060197	STIM1	Low-evidence
orf9b	Q7KZF4	SARS_CoV_1	0.0128212	1	0	1	33060197	SND1	Low-evidence
nsp2	O15371	SARS_CoV_1	0.0128212	1	0	1	33060197	EIF3D	Low-evidence
nsp2	O75821	SARS_CoV_1	0.0124317	2	0	2	33060197;37499664	EIF3G	Medium-evidence
orf4a	Q9H6S0	MERS	0.0124317	1	0	1	33060197	YTHDC2	Low-evidence
M	Q9GZM5	SARS_CoV_1	0.0120538	1	0	1	33060197	YIPF3	Low-evidence
nsp6	O75964	SARS_CoV_2	0.0120538	3	0	3	32353859;33060197;34709727	ATP5MG	Medium-evidence
orf9b	O14745	SARS_CoV_2	0.0116873	3	0	3	32353859;33060197;888800000817	NHERF1	Medium-evidence
orf4b	P52294	MERS	0.0116873	1	0	1	33060197	KPNA1	Low-evidence
orf9b	Q6NSI4	SARS_CoV_1	0.0116873	1	0	1	33060197	RADX	Low-evidence
nsp8	Q7L2J0	SARS_CoV_1	0.0116873	2	0	2	33060197;37499664	MEPCE	Medium-evidence
orf4a	Q96RS0	MERS	0.0113318	1	0	1	33060197	TGS1	Low-evidence
M	P38606	SARS_CoV_2	0.0113318	5	0	5	32353859;33060197;40593736;888800000817	ATP6V1A	Medium-evidence
nsp2	O75822	SARS_CoV_1	0.0109869	1	0	1	33060197	EIF3J	Low-evidence
nsp8	P82675	SARS_CoV_2	0.0109869	2	1	3	32353859;33060197;37483225	MRPS5	High-evidence
nsp16	Q15796	MERS	0.0106525	1	0	1	33060197	SMAD2	Low-evidence
nsp2	Q14152	SARS_CoV_1	0.0106525	1	0	1	33060197	EIF3A	Low-evidence
orf9b	Q9UL15	SARS_CoV_2	0.0106525	3	0	3	32353859;33060197;888800000817	BAG5	Medium-evidence
orf3	P15531	MERS	0.0103282	1	0	1	33060197	NME1	Low-evidence
nsp2	Q9Y262	SARS_CoV_1	0.0103282	1	0	1	33060197	EIF3L	Low-evidence
nsp8	Q9BSC4	SARS_CoV_2	0.0103282	3	0	3	32353859;33060197;888800000833	NOL10	Medium-evidence
M	Q9BV40	MERS	0.0103282	1	0	1	33060197	VAMP8	Low-evidence
nsp8	Q9H6F5	SARS_CoV_2	0.0103282	4	0	4	32353859;33060197;34578187;38172120	CCDC86	Medium-evidence
nsp7	Q8N183	SARS_CoV_2	0.0100136	2	1	3	32353859;33060197;37483225	NDUFAF2	High-evidence
orf5	P46379	MERS	0.0100136	1	0	1	33060197	BAG6	Low-evidence
orf5	P81408	MERS	0.0100136	1	0	1	33060197	ENTREP3	Low-evidence
nsp8	Q13868	SARS_CoV_2	0.0100136	3	0	3	32353859;33060197;36241425	EXOSC2	Medium-evidence
nsp2	Q99613	SARS_CoV_1	0.0100136	1	0	1	33060197	EIF3C	Low-evidence
nsp7	Q9NYP7	SARS_CoV_1	0.0100136	1	0	1	33060197	ELOVL5	Low-evidence
nsp4	Q6VN20	SARS_CoV_1	0.0100136	1	0	1	33060197	RANBP10	Low-evidence
orf3a	O95573	SARS_CoV_1	0.00970848	1	0	1	33060197	ACSL3	Low-evidence
orf9b	Q7KZI7	SARS_CoV_1	0.00970848	2	0	2	33060197;33845483	MARK2	Medium-evidence
nsp7	Q8WVC6	MERS	0.00970848	1	0	1	33060197	DCAKD	Low-evidence
nsp8	P51114	MERS	0.00941259	1	0	1	33060197	FXR1	Low-evidence
nsp8	Q15397	SARS_CoV_1	0.00941259	1	0	1	33060197	PUM3	Low-evidence
nsp8	Q9Y399	SARS_CoV_2	0.00941259	3	0	3	32353859;33060197;33080218	MRPS2	Medium-evidence
orf7a	Q7L1Q6	SARS_CoV_1	0.00941259	1	0	1	33060197	BZW1	Low-evidence
orf9b	O95229	SARS_CoV_1	0.00941259	1	0	1	33060197	ZWINT	Low-evidence
nsp2	Q6Y7W6	SARS_CoV_1	0.00941259	2	1	3	19640993;33060197;33263384	GIGYF2	High-evidence
nsp8	Q9Y3A4	MERS	0.00912564	1	0	1	33060197	RRP7A	Low-evidence
nsp7	Q8WVC6	SARS_CoV_2	0.00912564	2	0	2	32353859;33060197	DCAKD	Medium-evidence
orf9b	Q7KZI7	SARS_CoV_2	0.00912564	10	4	14	32353859;33060197;34597346;34672954;34709727;37483225;38969617;888800000082;888800000104;888800000109;888800000817;888800001056	MARK2	High-evidence
orf9b	Q9P0L2	SARS_CoV_1	0.00912564	1	0	1	33060197	MARK1	Low-evidence
nsp8	Q8IY81	MERS	0.00884736	1	0	1	33060197	FTSJ3	Low-evidence
orf8a	Q9NYU2	SARS_CoV_1	0.00884736	1	0	1	33060197	UGGT1	Low-evidence
nsp8	P82663	SARS_CoV_2	0.00884736	2	0	2	32353859;33060197	MRPS25	Medium-evidence
nsp8	P51116	MERS	0.00884736	1	0	1	33060197	FXR2	Low-evidence
orf9b	Q9H773	SARS_CoV_2	0.00857749	3	1	4	32353859;33060197;37483225;888800000817	DCTPP1	High-evidence
orf8	Q99988	SARS_CoV_2	0.00857749	3	0	3	32353859;33060197;36952345	GDF15	Medium-evidence
orf4a	Q5VYS8	MERS	0.00857749	1	0	1	33060197	TUT7	Low-evidence
orf3a	Q96S66	SARS_CoV_1	0.00831578	2	0	2	33060197;33845483	CLCC1	Medium-evidence
nsp8	P82675	SARS_CoV_1	0.00831578	1	0	1	33060197	MRPS5	Low-evidence
nsp2	Q86UK7	SARS_CoV_1	0.00831578	2	0	2	33060197;37499664	ZNF598	Medium-evidence
nsp8	Q9BSC4	MERS	0.00806199	1	0	1	33060197	NOL10	Low-evidence
nsp8	Q9Y3B2	MERS	0.00806199	1	0	1	33060197	EXOSC1	Low-evidence
nsp2	O60573	SARS_CoV_1	0.00806199	2	1	3	19640993;33060197;33263384	EIF4E2	High-evidence
nsp7	Q5VT66	SARS_CoV_2	0.00806199	2	0	2	32353859;33060197	MTARC1	Medium-evidence
orf4a	Q92552	MERS	0.00806199	1	0	1	33060197	MRPS27	Low-evidence
orf4a	Q8IZ69	MERS	0.00757724	1	0	1	33060197	TRMT2A	Low-evidence
orf8a	Q6NUQ4	SARS_CoV_1	0.00757724	1	0	1	33060197	TMEM214	Low-evidence
orf9b	Q9UKA9	SARS_CoV_2	0.00734583	3	0	3	32353859;33060197;40593736	PTBP2	Medium-evidence
orf8a	Q9BS26	SARS_CoV_1	0.00734583	1	0	1	33060197	ERP44	Low-evidence
nsp8	O95707	MERS	0.00734583	1	0	1	33060197	POP4	Low-evidence
nsp8	Q9NY61	MERS	0.00734583	1	0	1	33060197	AATF	Low-evidence
nsp8	Q99848	MERS	0.00712143	1	0	1	33060197	EBNA1BP2	Low-evidence
orf9b	Q9H2P9	SARS_CoV_2	0.00712143	2	0	2	32353859;33060197	DPH5	Medium-evidence
nsp4	P62072	SARS_CoV_2	0.00690384	2	0	2	32353859;33060197	TIMM10	Medium-evidence
nsp8	Q9Y3B7	SARS_CoV_1	0.00690384	1	0	1	33060197	MRPL11	Low-evidence
orf4a	P09132	MERS	0.00690384	1	0	1	33060197	SRP19	Low-evidence
orf4a	Q9BST9	MERS	0.00669285	1	0	1	33060197	RTKN	Low-evidence
orf7a	Q7Z4Q2	SARS_CoV_2	0.00669285	2	0	2	32353859;33060197	HEATR3	Medium-evidence
orf4a	P51398	MERS	0.00669285	1	0	1	33060197	DAP3	Low-evidence
orf4a	Q8IY37	MERS	0.00648827	1	0	1	33060197	DHX37	Low-evidence
N	O75683	SARS_CoV_1	0.00648827	1	0	1	33060197	SURF6	Low-evidence
orf9b	Q9P0L2	SARS_CoV_2	0.0062899	9	0	9	32353859;33060197;34597346;34709727;40593736;888800000082;888800000109;888800000817	MARK1	Medium-evidence
orf4a	P61011	MERS	0.0062899	1	0	1	33060197	SRP54	Low-evidence
orf8a	P07237	SARS_CoV_1	0.0062899	1	0	1	33060197	P4HB	Low-evidence
orf8b	Q5JRX3	SARS_CoV_1	0.00609756	2	0	2	33060197;33845483	PITRM1	Medium-evidence
orf4a	P38935	MERS	0.00609756	1	0	1	33060197	IGHMBP2	Low-evidence
orf4a	Q96KR1	MERS	0.00573025	1	0	1	33060197	ZFR	Low-evidence
M	Q9ULX6	SARS_CoV_2	0.00555492	4	1	5	32353859;33060197;33111431;37201587;888800000817	AKAP8L	High-evidence
orf8a	O60568	SARS_CoV_1	0.00555492	1	0	1	33060197	PLOD3	Low-evidence
orf8a	Q9H488	SARS_CoV_1	0.00538494	1	0	1	33060197	POFUT1	Low-evidence
orf4a	O43818	MERS	0.00522013	1	0	1	33060197	RRP9	Low-evidence
orf8b	Q10713	SARS_CoV_1	0.00522013	2	0	2	33060197;33845483	PMPCA	Medium-evidence
orf8a	Q02809	SARS_CoV_1	0.00490541	1	0	1	33060197	PLOD1	Low-evidence
orf4a	O76094	MERS	0.00490541	1	0	1	33060197	SRP72	Low-evidence
orf6	Q9NZJ7	SARS_CoV_2	0.0047552	2	0	2	32353859;33060197	MTCH1	Medium-evidence
orf4a	Q49MG5	MERS	0.0047552	1	0	1	33060197	MAP9	Low-evidence
nsp4	Q9Y5J7	SARS_CoV_2	0.00460957	2	0	2	32353859;33060197	TIMM9	Medium-evidence
orf4a	Q9Y399	MERS	0.00460957	1	0	1	33060197	MRPS2	Low-evidence
orf8a	Q8NBJ5	SARS_CoV_1	0.00460957	1	0	1	33060197	COLGALT1	Low-evidence
orf4a	Q96G21	MERS	0.00446838	1	0	1	33060197	IMP4	Low-evidence
orf3	Q8N129	MERS	0.00446838	1	0	1	33060197	CNPY4	Low-evidence
orf4a	Q7KZI7	MERS	0.0043315	1	0	1	33060197	MARK2	Low-evidence
orf8a	P27797	SARS_CoV_1	0.0043315	1	0	1	33060197	CALR	Low-evidence
orf8b	P46199	SARS_CoV_1	0.0043315	1	0	1	33060197	MTIF2	Low-evidence
orf4a	Q9Y2Q9	MERS	0.00407014	1	0	1	33060197	MRPS28	Low-evidence
orf4a	Q02040	MERS	0.00407014	1	0	1	33060197	AKAP17A	Low-evidence
orf8a	Q9NVA1	SARS_CoV_1	0.00407014	1	0	1	33060197	UQCC1	Low-evidence
nsp8	Q8N983	SARS_CoV_1	0.00394541	1	0	1	33060197	MRPL43	Low-evidence
orf4a	Q7L2J0	MERS	0.00394541	1	0	1	33060197	MEPCE	Low-evidence
orf6	Q9HBL7	SARS_CoV_1	0.00382448	1	0	1	33060197	PLGRKT	Low-evidence
orf8b	O75439	SARS_CoV_1	0.00382448	2	0	2	33060197;33845483	PMPCB	Medium-evidence
orf4a	P82675	MERS	0.00382448	1	0	1	33060197	MRPS5	Low-evidence
orf4a	Q9P015	MERS	0.00382448	1	0	1	33060197	MRPL15	Low-evidence
nsp8	Q9ULX6	MERS	0.00370725	1	0	1	33060197	AKAP8L	Low-evidence
orf8a	P13667	SARS_CoV_1	0.00348342	1	0	1	33060197	PDIA4	Low-evidence
nsp8	Q99547	MERS	0.00348342	1	0	1	33060197	MPHOSPH6	Low-evidence
orf3a	Q92734	SARS_CoV_1	0.00348342	1	0	1	33060197	TFG	Low-evidence
orf5	P11441	MERS	0.00348342	1	0	1	33060197	UBL4A	Low-evidence
orf4a	Q9HC52	MERS	0.00337661	1	0	1	33060197	CBX8	Low-evidence
orf10	Q3KQU3	SARS_CoV_2	0.00327306	2	0	2	32353859;33060197	MAP7D1	Medium-evidence
nsp7	Q96A26	SARS_CoV_2	0.00307537	2	0	2	32353859;33060197	FAM162A	Medium-evidence
orf4a	Q86XZ4	MERS	0.00307537	1	0	1	33060197	SPATS2	Low-evidence
orf4a	P82933	MERS	0.00298103	1	0	1	33060197	MRPS9	Low-evidence
orf8a	Q96AY3	SARS_CoV_1	0.00280093	1	0	1	33060197	FKBP10	Low-evidence
orf4a	Q68D10	MERS	0.00271499	1	0	1	33060197	SPTY2D1	Low-evidence
orf4a	Q9H6F5	MERS	0.00263167	1	0	1	33060197	CCDC86	Low-evidence
orf4a	Q9UL40	MERS	0.00255091	1	0	1	33060197	ZNF346	Low-evidence
orf4a	Q96EL2	MERS	0.00247262	1	0	1	33060197	MRPS24	Low-evidence
orf4a	Q8N567	MERS	0.00247262	1	0	1	33060197	ZCCHC9	Low-evidence
orf4a	Q9UHA3	MERS	0.00247262	1	0	1	33060197	RSL24D1	Low-evidence
orf8	P0C7P0	SARS_CoV_2	0.00247262	3	0	3	32353859;33060197;888800000817	CISD3	Medium-evidence
nsp7	Q96A26	SARS_CoV_1	0.00247262	1	0	1	33060197	FAM162A	Low-evidence
orf4a	Q6DD87	MERS	0.00247262	1	0	1	33060197	ZNF787	Low-evidence
orf4a	Q5VV52	MERS	0.00232316	1	0	1	33060197	ZNF691	Low-evidence
nsp7	Q96A26	MERS	0.00225185	1	0	1	33060197	FAM162A	Low-evidence
orf10	P62877	SARS_CoV_2	0.0021157	2	1	3	32353859;33060197;37483225	RBX1	High-evidence
orf4a	Q9Y3A2	MERS	0.0021157	1	0	1	33060197	UTP11	Low-evidence
orf4a	Q9Y3B7	MERS	0.0021157	1	0	1	33060197	MRPL11	Low-evidence
orf4a	Q96EU6	MERS	0.00205074	1	0	1	33060197	RRP36	Low-evidence
orf8a	Q9NPA0	SARS_CoV_1	0.00198777	1	0	1	33060197	EMC7	Low-evidence
orf4a	P82663	MERS	0.00186757	1	0	1	33060197	MRPS25	Low-evidence
orf10	Q9Y5J9	SARS_CoV_2	0.00181021	2	0	2	32353859;33060197	TIMM8B	Medium-evidence
orf8a	Q9UMX5	SARS_CoV_1	0.00154876	1	0	1	33060197	NENF	Low-evidence
orf4a	Q9Y291	MERS	0.00132502	1	0	1	33060197	MRPS33	Low-evidence
orf8a	Q15006	SARS_CoV_1	0.00124484	1	0	1	33060197	EMC2	Low-evidence
orf8a	Q4G0I0	SARS_CoV_1	0.00120659	1	0	1	33060197	UQCC4	Low-evidence
orf8a	Q9BRT2	SARS_CoV_1	0.00113357	1	0	1	33060197	UQCC2	Low-evidence

## Sheet: Extended Data Table 4
human_gene_name	Bait	Interaction_virus_list	n_virus_x
ADAMTS1	orf8	['SARS_CoV_2_orf8']	1
APPBP2	nsp11	['SARS_CoV_1_nsp11']	1
ATP1B1	M	['SARS_CoV_1_M', 'SARS_CoV_2_M']	2
ATP6AP1	nsp6	['SARS_CoV_2_nsp6']	1
ATP6AP2	E	['MERS_E']	1
BCKDK	nsp12	['SARS_CoV_2_nsp12']	1
BRD2	E	['SARS_CoV_2_E']	1
BRD4	E	['SARS_CoV_2_E']	1
CCDC28A	nsp9	['MERS_nsp9']	1
CCHCR1	nsp12	['SARS_CoV_1_nsp12']	1
CCP110	nsp12	['SARS_CoV_1_nsp12']	1
CDK5RAP2	nsp13	['MERS_nsp13', 'SARS_CoV_1_nsp13', 'SARS_CoV_2_nsp13']	3
CEBPZOS	nsp7	['MERS_nsp7', 'SARS_CoV_1_nsp7']	2
CENPF	nsp13	['MERS_nsp13', 'SARS_CoV_2_nsp13']	2
CEP350	nsp13	['SARS_CoV_1_nsp13', 'SARS_CoV_2_nsp13']	2
CIT	nsp13	['SARS_CoV_2_nsp13']	1
CLCC1	orf3a	['SARS_CoV_1_orf3a', 'SARS_CoV_2_orf3a']	2
CLCC1	orf5	['MERS_orf5']	1
CMTR1	nsp9	['SARS_CoV_1_nsp9']	1
CNTRL	nsp13	['SARS_CoV_2_nsp13']	1
COMMD3	nsp16	['SARS_CoV_2_nsp16']	1
CRTC3	nsp12	['SARS_CoV_1_nsp12', 'SARS_CoV_2_nsp12']	2
CSNK2B	N	['SARS_CoV_1_N', 'SARS_CoV_2_N']	2
CUL2	orf10	['SARS_CoV_2_orf10']	1
CUX1	nsp12	['SARS_CoV_1_nsp12']	1
DCP1A	E	['MERS_E']	1
DDX21	N	['SARS_CoV_2_N']	1
DNAJB9	E	['MERS_E']	1
EIF2B1	nsp9	['SARS_CoV_1_nsp9']	1
ELOB	orf10	['SARS_CoV_2_orf10']	1
ELOC	orf10	['SARS_CoV_2_orf10']	1
ERP44	orf8	['SARS_CoV_2_orf8']	1
ERP44	orf8a	['SARS_CoV_1_orf8a']	1
FAM98A	N	['SARS_CoV_1_N', 'SARS_CoV_2_N']	2
FYCO1	nsp13	['MERS_nsp13', 'SARS_CoV_2_nsp13']	2
GARS1	nsp9	['MERS_nsp9']	1
GCC2	nsp13	['MERS_nsp13', 'SARS_CoV_2_nsp13']	2
GFER	nsp10	['SARS_CoV_2_nsp10']	1
GGH	orf8	['SARS_CoV_2_orf8']	1
GOLGA2	nsp13	['MERS_nsp13', 'SARS_CoV_1_nsp13', 'SARS_CoV_2_nsp13']	3
GOLGA7	S	['SARS_CoV_2_S']	1
GORASP1	nsp13	['SARS_CoV_1_nsp13', 'SARS_CoV_2_nsp13']	2
GTF2F2	nsp9	['SARS_CoV_2_nsp9']	1
KPNA4	orf4b	['MERS_orf4b']	1
LAP3	nsp16	['SARS_CoV_1_nsp16', 'SARS_CoV_2_nsp16']	2
LARP7	nsp8	['SARS_CoV_1_nsp8', 'SARS_CoV_2_nsp8']	2
LARP7	orf4a	['MERS_orf4a']	1
LMAN2	nsp7	['SARS_CoV_1_nsp7', 'SARS_CoV_2_nsp7']	2
LSM 3.00	nsp9	['MERS_nsp9']	1
MAT2B	nsp9	['SARS_CoV_2_nsp9']	1
MIB1	nsp9	['MERS_nsp9', 'SARS_CoV_1_nsp9', 'SARS_CoV_2_nsp9']	3
MOGS	nsp7	['MERS_nsp7', 'SARS_CoV_2_nsp7']	2
MPHOSPH10	nsp8	['SARS_CoV_1_nsp8', 'SARS_CoV_2_nsp8']	2
MPHOSPH10	orf4a	['MERS_orf4a']	1
MYO5B	nsp13	['SARS_CoV_1_nsp13']	1
NEK9	nsp9	['SARS_CoV_1_nsp9', 'SARS_CoV_2_nsp9']	2
NIN	nsp13	['MERS_nsp13', 'SARS_CoV_1_nsp13', 'SARS_CoV_2_nsp13']	3
NINL	nsp13	['MERS_nsp13', 'SARS_CoV_1_nsp13', 'SARS_CoV_2_nsp13']	3
NUP214	nsp9	['SARS_CoV_2_nsp9']	1
NUP214	orf6	['SARS_CoV_1_orf6']	1
NUP54	nsp9	['SARS_CoV_2_nsp9']	1
NUP58	nsp9	['SARS_CoV_2_nsp9']	1
PABPC1	N	['SARS_CoV_1_N', 'SARS_CoV_2_N']	2
PDE4DIP	nsp13	['MERS_nsp13', 'SARS_CoV_1_nsp13', 'SARS_CoV_2_nsp13']	3
PEX19	orf8a	['SARS_CoV_1_orf8a']	1
PHLDB2	nsp12	['SARS_CoV_1_nsp12']	1
PHLDB2	nsp16	['SARS_CoV_2_nsp16']	1
PKP2	nsp1	['SARS_CoV_2_nsp1']	1
PLEKHA5	nsp12	['SARS_CoV_1_nsp12', 'SARS_CoV_2_nsp12']	2
PMPCB	M	['SARS_CoV_2_M']	1
PMPCB	orf8b	['SARS_CoV_1_orf8b']	1
POGLUT2	orf8	['SARS_CoV_2_orf8']	1
POLA2	nsp1	['SARS_CoV_1_nsp1', 'SARS_CoV_2_nsp1']	2
PRIM1	nsp1	['SARS_CoV_1_nsp1', 'SARS_CoV_2_nsp1']	2
PRIM2	nsp1	['SARS_CoV_1_nsp1', 'SARS_CoV_2_nsp1']	2
PTGES2	nsp7	['MERS_nsp7', 'SARS_CoV_1_nsp7', 'SARS_CoV_2_nsp7']	3
QSOX2	nsp7	['MERS_nsp7', 'SARS_CoV_1_nsp7', 'SARS_CoV_2_nsp7']	3
RAB5C	nsp7	['SARS_CoV_2_nsp7']	1
RAB8A	nsp7	['SARS_CoV_1_nsp7', 'SARS_CoV_2_nsp7']	2
RAD23B	orf3	['MERS_orf3']	1
RAE1	orf6	['SARS_CoV_1_orf6', 'SARS_CoV_2_orf6']	2
RCBTB1	nsp13	['MERS_nsp13']	1
RIPK1	nsp12	['SARS_CoV_1_nsp12', 'SARS_CoV_2_nsp12']	2
RPL36	N	['SARS_CoV_1_N', 'SARS_CoV_2_N']	2
SARM1	nsp9	['MERS_nsp9']	1
SAV1	nsp16	['SARS_CoV_2_nsp16']	1
SCARB1	nsp7	['SARS_CoV_1_nsp7', 'SARS_CoV_2_nsp7']	2
SCFD1	E	['MERS_E']	1
SELENOS	nsp7	['MERS_nsp7', 'SARS_CoV_1_nsp7', 'SARS_CoV_2_nsp7']	3
SEMA4F	nsp16	['SARS_CoV_2_nsp16']	1
SIGMAR1	nsp6	['SARS_CoV_1_nsp6', 'SARS_CoV_2_nsp6']	2
SNIP1	N	['SARS_CoV_1_N', 'SARS_CoV_2_N']	2
SPART	nsp9	['SARS_CoV_1_nsp9', 'SARS_CoV_2_nsp9']	2
SRP72	nsp8	['SARS_CoV_1_nsp8', 'SARS_CoV_2_nsp8']	2
SRP72	orf4a	['MERS_orf4a']	1
TBK1	nsp13	['SARS_CoV_2_nsp13']	1
TBK1	nsp16	['SARS_CoV_2_nsp16']	1
TCF12	nsp12	['SARS_CoV_2_nsp12']	1
TNPO3	E	['MERS_E']	1
TOMM70	orf9b	['SARS_CoV_1_orf9b', 'SARS_CoV_2_orf9b']	2
TRAPPC5	nsp7	['SARS_CoV_1_nsp7']	1
UACA	nsp13	['SARS_CoV_1_nsp13']	1
UBE3A	nsp16	['SARS_CoV_2_nsp16']	1
USP13	nsp13	['SARS_CoV_1_nsp13', 'SARS_CoV_2_nsp13']	2
USP13	nsp16	['MERS_nsp16']	1
USP54	nsp12	['SARS_CoV_1_nsp12', 'SARS_CoV_2_nsp12']	2
USP54	nsp16	['SARS_CoV_2_nsp16']	1
ZC3H18	E	['SARS_CoV_2_E']	1
ZC3H7A	nsp12	['SARS_CoV_1_nsp12', 'SARS_CoV_2_nsp12']	2
ZNF503	nsp9	['SARS_CoV_2_nsp9']	1
ZYG11B	nsp11	['SARS_CoV_1_nsp11']	1
ZYG11B	orf10	['SARS_CoV_2_orf10']	1

## Sheet: Extended Data Table 5
UNIPROT_VIRUS	human_gene	pred_prob	VIRUS_NAME
H3N2_M1	RAB11A	0.723072	H3N2
H3N2_M1	SFN	0.761866	H3N2
H3N2_M1	CHEK1	0.718556	H3N2
H3N2_M1	ARF6	0.747382	H3N2
H3N2_M1	RAP2C	0.726037	H3N2
H3N2_M1	CDK1	0.726112	H3N2
H3N2_M1	RAP2B	0.72628	H3N2
H3N2_M1	ACTC1	0.724763	H3N2
H3N2_NS1	RAB11B	0.816987	H3N2
H3N2_NP	SRSF7	0.814264	H3N2
H3N2_NS1	RAB11A	0.774737	H3N2
H3N2_M1	RHOC	0.754397	H3N2
H3N2_HA	RAB1C	0.770257	H3N2
H3N2_NS1	ACTA1	0.767835	H3N2
H3N2_M2	RAB11A	0.716335	H3N2
H3N2_NP	RAP2B	0.73227	H3N2
H3N2_NP	RAP2C	0.710306	H3N2
H3N2_NS1	RAP2B	0.70024	H3N2
H3N2_NS1	TUBB2B	0.724434	H3N2
H3N2_M1	RAB8A	0.707496	H3N2
H3N2_M1	RHOA	0.7064	H3N2
H3N2_NS1	TUBB2A	0.708363	H3N2
H3N2_M1	RAB6B	0.770414	H3N2
H3N2_NS1	ARF6	0.77435	H3N2
H3N2_NS1	SRSF3	0.755039	H3N2
H3N2_NS1	YWHAB	0.707208	H3N2
H3N2_HA	RAB11B	0.748159	H3N2
H3N2_NEP	CHP1	0.75472	H3N2
H3N2_NS1	RAB5A	0.704558	H3N2
H3N2_HA	RAB1A	0.710387	H3N2
H3N2_NS1	RAB1A	0.862815	H3N2
H3N2_NP	SUMO2	0.851223	H3N2
H3N2_NP	RAB11A	0.701006	H3N2
H3N2_M1	RAB1B	0.73196	H3N2
H3N2_NEP	RAB2A	0.706767	H3N2
H3N2_NP	ARF6	0.752512	H3N2
H3N2_NP	HMGB2	0.722976	H3N2
H3N2_M1	RAB8B	0.741108	H3N2
H3N2_NEP	ZNF436	0.74621	H3N2
H3N2_NP	RHOA	0.710583	H3N2
H3N2_NS1	H2AX	0.749916	H3N2
H3N2_NS1	SLC25A6	0.740967	H3N2
H3N2_NS1	TUBB3	0.710167	H3N2
H3N2_HA	ARF4	0.749266	H3N2
H3N2_HA	PPP6C	0.795328	H3N2
H3N2_M2	RAB25	0.738151	H3N2
H3N2_NA1	PPP6C	0.780682	H3N2
H3N2_NEP	CALR	0.851544	H3N2
H3N2_NEP	KRT19	0.7027	H3N2
H3N2_NP	RAB1A	0.774306	H3N2
H3N2_NP	RHOC	0.779501	H3N2
H3N2_PA	PPP6C	0.720523	H3N2
H3N2_NP	RAB8B	0.795045	H3N2
H3N2_HA	RAB11A	0.719357	H3N2
H3N2_HA	ARF3	0.771614	H3N2
H3N2_M1	ANXA2	0.739906	H3N2
H3N2_M1	CDK2	0.702795	H3N2
H3N2_M1	GZMB	0.768836	H3N2
H3N2_M1	PRSS3P2	0.820084	H3N2
H3N2_NEP	KRT15	0.73929	H3N2
H3N2_NP	SFN	0.711283	H3N2
H3N2_NEP	KRT13	0.730053	H3N2
H3N2_HA	RAB5A	0.821127	H3N2
H3N2_M2	RAB8A	0.706047	H3N2
H3N2_NEP	TUBB2A	0.730034	H3N2
H3N2_NS1	RAB25	0.715462	H3N2
H3N2_M1	RALB	0.713409	H3N2
H3N2_NEP	ACTA1	0.777637	H3N2
H3N2_M1	HMGB2	0.736125	H3N2
H3N2_M1	RAB27B	0.719268	H3N2
H3N2_HA	ACTA1	0.704015	H3N2
H3N2_M1	HMGB1	0.742005	H3N2
H3N2_HA	ARF6	0.72223	H3N2
H3N2_HA	CALR	0.71582	H3N2
H3N2_M1	CDK3	0.873769	H3N2
H3N2_M1	KRT19	0.705959	H3N2
H3N2_M1	RAB35	0.887722	H3N2
H3N2_M1	RAB4A	0.704435	H3N2
H3N2_M1	SUMO2	0.702319	H3N2
H3N2_M2	RAP1A	0.704617	H3N2
H3N2_NEP	ARF3	0.791916	H3N2
H3N2_NEP	TUBB2B	0.738729	H3N2
H3N2_NP	RAB1C	0.753553	H3N2
H3N2_NS1	RCN2	0.894805	H3N2
H3N2_HA	ACTA2	0.807695	H3N2
H3N2_NEP	RAB8B	0.729706	H3N2
H3N2_NP	PPP6C	0.856533	H3N2
H3N2_NS1	CTSG	0.704473	H3N2
H3N2_NS1	H2AC1	0.726162	H3N2
H3N2_NS1	H2AJ	0.742076	H3N2
H3N2_HA	VDAC1	0.782076	H3N2
H3N2_M1	CDK5	0.799949	H3N2
H3N2_M1	RHOG	0.750555	H3N2
H3N2_NS1	GZMB	0.732004	H3N2
H3N2_NS1	H2AC21	0.725622	H3N2
H3N2_NP	HMGB1	0.716661	H3N2
H3N2_NA1	ARF3	0.761412	H3N2
H3N2_NEP	SLC25A5	0.732681	H3N2
H3N2_NS1	S100A13	0.786628	H3N2
H3N2_HA	KRT83	0.749429	H3N2
H1N1_NS1	YWHAB	0.760671	H1N1
H1N1_M1	RAP2C	0.745869	H1N1
H1N1_NS1	RAB11A	0.733001	H1N1
H1N1_M1	ARF6	0.793344	H1N1
H1N1_HA	ARF6	0.769385	H1N1
H1N1_M1	RAB11A	0.846025	H1N1
H1N1_M2	RAB29	0.848089	H1N1
H1N1_NS1	RAB11B	0.735433	H1N1
H1N1_M1	RAP2B	0.743622	H1N1
H1N1_M1	SFN	0.812091	H1N1
H1N1_NS1	ARF3	0.756544	H1N1
H1N1_NS1	CDK1	0.74412	H1N1
H1N1_M1	RAB1B	0.784555	H1N1
H1N1_M1	RAB29	0.830105	H1N1
H1N1_NS1	RAB1A	0.806552	H1N1
H1N1_M1	CDK1	0.745175	H1N1
H1N1_NS1	SRSF3	0.803656	H1N1
H1N1_M2	RAB11A	0.825273	H1N1
H1N1_HA	KRT83	0.734276	H1N1
H1N1_NS1	ARF6	0.827368	H1N1
H1N1_HA	RAB1A	0.804105	H1N1
H1N1_M1	SRSF7	0.811817	H1N1
H1N1_M2	RAB18	0.823172	H1N1
H1N1_NS1	RAB5A	0.796816	H1N1
H1N1_NS1	RAP2B	0.752706	H1N1
H1N1_M1	RHOA	0.79186	H1N1
H1N1_NEP	KRT19	0.708864	H1N1
H1N1_NS1	ACTA1	0.785068	H1N1
H1N1_HA	RAB11B	0.844318	H1N1
H1N1_M1	HMGB2	0.774819	H1N1
H1N1_M2	ACTG1	0.802416	H1N1
H1N1_HA	RAB11A	0.8396	H1N1
H1N1_HA	KRT81	0.735536	H1N1
H1N1_HA	KRT85	0.729767	H1N1
H1N1_HA	KRT86	0.733755	H1N1
H1N1_M1	ACTC1	0.758635	H1N1
H1N1_NEP	ACTG1	0.773687	H1N1
H1N1_M2	ARF6	0.838454	H1N1
H1N1_M1	KRT83	0.766476	H1N1
H1N1_M1	TUBB3	0.761491	H1N1
H1N1_M2	CDK1	0.803657	H1N1
H1N1_NS1	H2AC21	0.728573	H1N1
H1N1_NS1	H2AX	0.733425	H1N1
H1N1_M2	RRAS	0.805372	H1N1
H1N1_M1	RAB6B	0.843844	H1N1
H1N1_NEP	KRT83	0.700487	H1N1
H1N1_NP	SRSF7	0.823519	H1N1
H1N1_HA	RAB1C	0.803878	H1N1
H1N1_NS1	CDK2	0.807773	H1N1
H1N1_NP	SUMO2	0.794186	H1N1
H1N1_NS1	APOBEC3C	0.824153	H1N1
H1N1_NP	RAB1A	0.817176	H1N1
H1N1_NS1	H2AC6	0.738072	H1N1
H1N1_NS1	H2AJ	0.750155	H1N1
H1N1_HA	ACTG1	0.75557	H1N1
H1N1_M1	ACTB	0.775133	H1N1
H1N1_M1	KRT19	0.725461	H1N1
H1N1_M2	RAB8A	0.786355	H1N1
H1N1_NA1	PPP6C	0.820463	H1N1
H1N1_NP	MYL6B	0.791053	H1N1
H1N1_NA1	TUBA1A	0.768702	H1N1
H1N1_M1	KRT86	0.703312	H1N1
H1N1_M1	RAB8A	0.864132	H1N1
H1N1_M2	KRT15	0.722218	H1N1
H1N1_HA	RAB1B	0.829349	H1N1
H1N1_M1	UBB	0.824039	H1N1
H1N1_NS1	H2AC18,H2AC19	0.732087	H1N1
H1N1_NEP	KRT13	0.744901	H1N1
H1N1_NEP	KRT85	0.734985	H1N1
H1N1_NS1	FYN	0.771638	H1N1
H1N1_NS1	H2AC7	0.753714	H1N1
H1N1_NS1	TUBB2B	0.798454	H1N1
H1N1_M2	HMGB1	0.736099	H1N1
H1N1_M1	KRT85	0.733763	H1N1
H1N1_NEP	ARF6	0.788313	H1N1
H1N1_NS1	H2AC1	0.738451	H1N1
H1N1_NS1	RCN2	0.756392	H1N1
H1N1_HA	NME1	0.756328	H1N1
H1N1_NA1	ACTC1	0.763569	H1N1
H1N1_M1	HMGB1	0.79955	H1N1
H1N1_HA	UBB	0.762244	H1N1
H1N1_M1	FYN	0.74241	H1N1
H1N1_NS1	ACTG2	0.779022	H1N1
H1N1_NS1	APOBEC3F	0.750202	H1N1
H1N1_NS1	TUBB3	0.775666	H1N1
H1N1_NS1	TUBB4B	0.830751	H1N1
H1N1_M2	PRKACA	0.847836	H1N1
H1N1_M1	AKT1	0.748601	H1N1
H1N1_M1	FABP5	0.822718	H1N1
H1N1_M2	ACTC1	0.779845	H1N1
H1N1_NEP	KRT81	0.705699	H1N1
H1N1_NP	ARF4	0.863176	H1N1
H1N1_NS1	RAP1A	0.74183	H1N1
H1N1_NS1	RAP1BL	0.746175	H1N1
H1N1_M2	RAB8B	0.799241	H1N1
H1N1_NP	RAB11A	0.855647	H1N1
H1N1_NS1	KRT13	0.754811	H1N1
H1N1_M1	RAB4A	0.856911	H1N1
H1N1_HA	ACTC1	0.740307	H1N1
H1N1_HA	SRSF7	0.800296	H1N1
H9N2_HA	ARF4	0.773302	H9N2
H9N2_NS1	RAB11B	0.794281	H9N2
H9N2_M1	RAB11A	0.829883	H9N2
H9N2_NS1	RAB11A	0.793228	H9N2
H9N2_M1	RAP2B	0.755973	H9N2
H9N2_M1	RAP2C	0.751522	H9N2
H9N2_NS1	RAP2B	0.775986	H9N2
H9N2_HA	KRT83	0.738427	H9N2
H9N2_NEP	KRT19	0.721067	H9N2
H9N2_M2	RAB11A	0.812835	H9N2
H9N2_NS1	ARF3	0.762944	H9N2
H9N2_NS1	GZMA	0.736527	H9N2
H9N2_HA	RAB11A	0.827939	H9N2
H9N2_M1	RAB6B	0.839803	H9N2
H9N2_M2	RAB29	0.836259	H9N2
H9N2_NS1	ACTC1	0.790864	H9N2
H9N2_M1	ACTC1	0.740758	H9N2
H9N2_HA	KRT86	0.736974	H9N2
H9N2_HA	ARF6	0.771635	H9N2
H9N2_M1	SFN	0.810744	H9N2
H9N2_NS1	H2AC18,H2AC19	0.737154	H9N2
H9N2_HA	KRT85	0.733607	H9N2
H9N2_M1	RAB29	0.855383	H9N2
H9N2_NS1	H2AC21	0.730641	H9N2
H9N2_NS1	RAP1A	0.842657	H9N2
H9N2_NS1	ACTA1	0.796386	H9N2
H9N2_M1	GZMB	0.693394	H9N2
H9N2_NS1	RAB1A	0.810642	H9N2
H9N2_M2	ACTG1	0.783848	H9N2
H9N2_NP	HMGB2	0.766731	H9N2
H9N2_NS1	ARF6	0.790346	H9N2
H9N2_NS1	RAB1C	0.755546	H9N2
H9N2_M2	RAB18	0.839294	H9N2
H9N2_HA	ARF3	0.773728	H9N2
H9N2_M1	RAB1B	0.797584	H9N2
H9N2_NS1	CDK1	0.785983	H9N2
H9N2_HA	RAB11B	0.795038	H9N2
H9N2_HA	SLC25A6	0.747585	H9N2
H9N2_M1	RHOA	0.76828	H9N2
H9N2_M2	ARL_2.00	0.88686	H9N2
H9N2_NS1	TUBB2B	0.777881	H9N2
H9N2_M1	TUBB3	0.773933	H9N2
H9N2_NS1	YWHAQ	0.772288	H9N2
H9N2_NA1	SLC25A6	0.796825	H9N2
H9N2_NS1	H2AC6	0.746402	H9N2
H9N2_NS1	SRSF3	0.74962	H9N2
H9N2_M2	RAB25	0.78945	H9N2
H9N2_NA1	PPP6C	0.899287	H9N2
H9N2_NS1	TUBB2A	0.781464	H9N2
H9N2_NS1	TUBB3	0.776229	H9N2
H9N2_HA	HLA-H	0.766173	H9N2
H9N2_NS1	LYZ	0.763015	H9N2
H9N2_NEP	KRT13	0.749982	H9N2
H9N2_M1	ARF6	0.780927	H9N2
H9N2_M1	CDK1	0.767272	H9N2
H9N2_NS1	SRSF7	0.763665	H9N2
H9N2_M1	RAB27B	0.782598	H9N2
H9N2_M2	CDK1	0.796772	H9N2
H9N2_NA1	ARF4	0.776559	H9N2
H9N2_NEP	KRT83	0.705829	H9N2
H9N2_NS1	GZMB	0.844799	H9N2
H9N2_NS1	S100A13	0.762766	H9N2
H9N2_M2	RAB8B	0.790389	H9N2
H9N2_M1	KRT83	0.766175	H9N2
H9N2_M2	GNAT2	0.780962	H9N2
H9N2_M2	RAB39B	0.817447	H9N2
H9N2_HA	KRT81	0.730027	H9N2
H9N2_NS1	H2AX	0.752926	H9N2
H9N2_NS1	SLC25A6	0.75483	H9N2
H9N2_NP	RAB11A	0.772499	H9N2
H9N2_NEP	ACTG1	0.804132	H9N2
H9N2_M1	RAB35	0.865613	H9N2
H9N2_M1	SRSF7	0.811231	H9N2
H9N2_NP	KRT85	0.732608	H9N2
H9N2_NP	SRSF7	0.83099	H9N2
H9N2_HA	RAP2B	0.794363	H9N2
H9N2_M1	KRT19	0.71203	H9N2
H9N2_M1	UBB	0.771128	H9N2
H9N2_M2	RAB8A	0.775548	H9N2
H9N2_NEP	KRT85	0.701023	H9N2
H9N2_NS1	H2AC7	0.742607	H9N2
H9N2_NS1	RAB13	0.805209	H9N2
H9N2_NS1	TUBB4B	0.835982	H9N2
H9N2_HA	RAB1A	0.789656	H9N2
H9N2_M2	KRT15	0.700546	H9N2
H9N2_M2	RAP1A	0.808455	H9N2
H9N2_NP	RAB11B	0.780331	H9N2
H9N2_NP	RAB1A	0.780085	H9N2
H9N2_NS1	MAP1LC3A	0.755228	H9N2
H9N2_NS1	RAB25	0.828199	H9N2
H9N2_M1	HMGB1	0.783582	H9N2
H9N2_M1	RALB	0.755246	H9N2
H9N2_NA1	ARF6	0.781415	H9N2
H9N2_NS1	APOBEC3F	0.799663	H9N2
H9N2_M1	RAB8B	0.870245	H9N2
H9N2_NS1	RAB1B	0.807121	H9N2
H9N2_NS1	KRT13	0.739194	H9N2
H9N2_NEP	CHP1	0.800215	H9N2
H9N2_NS1	RAB5A	0.771662	H9N2
H9N2_HA	ACTA1	0.842971	H9N2

## Sheet: Extended Data Table 6
Number	Gene	Virus	Reference
1	SFN	Influenza A virus(IAV);Dengue virus(DENV);Severe acute respiratory syndrome coronavirus 2 (SARS-CoV-2)	PMID:37459366;36055433;36840402
2	RAB11A	Influenza A virus(IAV); Human Parainfluenza virus type 3 (HPIV3) ; Respiratory syncytial virus (RSV);Enterovirus 71 (EV-A71)	PMID:34473799;40259361;38943128
3	RAB11B	Influenza A virus(IAV);Severe acute respiratory syndrome coronavirus 2 (SARS-CoV-2)	PMID:41332559;35840993
4	ARF3	Influenza A virus(IAV)	PMID:40608252
5	CDK1	Influenza A virus(IAV);Japanese encephalitis virus (JEV); Hepatitis type B virus(HBV);Epstein-Barr virus (EBV);Herpes Simplex virus 2 (HSV-2);Oncolytic viruses (OVs)	PMID:35367281;34756071;38858165;32433544;40238458;40233744
6	SRSF3	Influenza A virus(IAV);Severe acute respiratory syndrome coronavirus 2 (SARS-CoV-2)	PMID:35063826;39138195
7	SRSF7	Influenza A virus(IAV); Hepatitis type B virus(HBV)	PMID:39134172;40343745
8	RHOA	Influenza A virus(IAV); Dengue virus(DENV)	PMID:41061927;40189910
9	HMGB1	Influenza A virus(IAV);Dengue virus(DENV);Severe acute respiratory syndrome coronavirus 2 (SARS-CoV-2);Zika virus (ZIKV);Respiratory syncytial virus (RSV)	PMID:40434888;36587643;33147444; 35058496;40525842
10	ARF4	Zika virus (ZIKV);influenza A virus (IAV);Severe acute respiratory syndrome coronavirus 2 (SARS-CoV-2)	PMID:39972062
11	PPP6C	Influenza A virus(IAV);Herpes Simplex virus 1 (HSV-1)	PMID：39368468;32474700
12	KRT13	Influenza A virus(IAV);Severe acute respiratory syndrome coronavirus 2 (SARS-CoV-2)	PMID: 38964332;34352228
13	KRT15	Human papillomavirus (HPV);Varicella-zoster virus (VZV)	PMID: 41462011;39385182
14	ARF6	Severe acute respiratory syndrome coronavirus 2 (SARS-CoV-2);Murine leukemia viruses （MuLV）;Human Immunodeficiency Virus type 1(HIV-1);Adeno-associated virus serotype 9(AAV9)	PMID：37342971;38334661;34435263; 41608631
15	RAP2C	Hepatitis E virus (HEV)	PMID：33996960
16	RAP2B	Hepatitis C virus (HCV) ;Human Papilloma virus(HPV)	PMID：23498955;30018982
17	RAB1B	African swine fever virus (ASFV);Hepatitis C Virus(HCV);Severe acute respiratory syndrome coronavirus 2 (SARS-CoV-2)	PMID：38169281;29020629;37112806
18	RAB1A	Hepatitis B virus(HBV);Classical Swine Fever virus (CSFV)	PMID： 40714109;29128753
19	RAB5A	Hepatitis B virus (HBV); Hepatitis E virus(HEV);Respiratory syncytial virus (RSV)	PMID：37725090;38109552;33504607
20	KRT19	Severe acute respiratory syndrome coronavirus 2 (SARS-CoV-2)	PMID：38532129
21	ACTA1	adeno-associated virus（AAV);Hepatitis B virus (HBV)	PMID：35867710;34041839
22	HMGB2	Kaposi's sarcoma-associated herpesvirus (KSHV);Lymphocytic Choriomeningitis virus (LCMV)	PMID：30699189;37704621
23	RAB8B	yellow head virus (YHV)	PMID: 38013134
24	ACTC1	adeno-associated virus（AAV); Porcine Circo virus 2 (PCV2)	PMID：30023931;35714796
25	H2AX	Pseudorabies virus(PRV);Hepatitis B virus (HBV);Epstein-Barr virus(EB);varicella-zoster virus (VZV)	PMID：35199383;41292688; 24429368;24606682
26	RAP1A	Respiratory syncytial virus (RSV)；Hepatitis B virus (HBV)	PMID: 35848790；27780730
27	RAB8A	adeno-associated virus（AAV);Respiratory syncytial virus (RSV)	PMID：27529348;34383332
28	TUBB3	BK polyomavirus (BKPyV) ;Human immunodeficiency virus-1 (HIV)	PMID：41527905;26826352
29	TUBB2B	Hepatitis B virus (HBV)	PMID：35592651
30	RAB6B	Hepatitis C virus (HCV)	PMID：17642525
31	KRT83	/	/
32	H2AC21	/	/
33	RAB1C	/	/

## Sheet: Extended Data Table 7
Virus_name	Protein	NCBI_ID	Sequence
H1N1	PB2	ADC45732.1	MERIKELRNLMSQSRTREILTKTTVDHMAIIKKYTSGRQEKNPSLRMKWMMAMKYPITADKRITEMIPERNEHGQTLWSKVNDAGSDRVMVSPLAVTWWNRNGPVASTIHYPKIYKTYFEKVERLKQGTFGPVHFRNQVKIRRRVDINPGHADLSAKEAQDVIMEVVFPNEVGARILTSESQLTITKEKKEELQNCKISPLMVAYMLERELVRKTRFLPVAGGTSSVYIEVLHLTQGTCWEQMYTPGGEVRNDDVDQSLIIAARNIVRRAAVSADPLASLLEMCHSTQIGGTRMVDILRQNPTEEQAVDICKAAMGLRISSSFSFGGFTFKRTSGSSVKREEEVLTGNLQTLKLTVHEGYEEFTMVGKRATAILRKATRRLIQLIVSGRDEQSIVEAIV…
H1N1	NS1	ADC45741.1	MDSHTVSSFQVDCFLWHVRKQVADQDLGDAPFLDRLRRDQKSLKGRGSTLGLNIETATCVGKQIVERILKEESDEALKMTMASALASRYLTDMTAEEMSRDWFMLMPKQKVAGPLCVRMDQAIMDKNIILKANFSVIFDRLENLTLLRAFTEEGAIVGEISPLPSFPGHTNEDVKNAIGVLIGGLEWNDNTVRVSETLQRFAWRSSNETGGPPFTTTQKRKMAGTTRSEV
H1N1	NEP	ADC45742.1	MDSHTVSSFQDILMRMSKMQLGSSSGDLNGMITQFESLKLYRDSLGEAVMRLGDLHSLQHRNGKWREQLGQKFEEVRWLIEEVRHKLKTTENSFEQITFIQALQLLFEVEQEIRTFSFQLI
H1N1	M2	ADC45740.1	MSLLTEVETPIRNEWGCRCNDSSDPLVVAASIIGIVHLILWIIDRLFSKSIYRIFKHGLKRGPSTEGVPESMREEYREEQQNAVDADDDHFVSIELE
H1N1	M1	ADC45739.1	MSLLTEVETYVLSIIPSGPLKAEIAQRLEDVFAGKNTDLEALMEWLKTRPILSPLTKGILGFVFTLTVPSERGLQRRRFVQNALNGNGDPNNMDRAVKLYRKLKREITFHGAKEIALSYSAGALASCMGLIYNRMGAVTTESAFGLICATCEQIADSQHKSHRQMVTTTNPLIRHENRMVLASTTAKAMEQMAGSSEQAAEAMEVASQARQMVQAMRAIGTHPSSSTGLKNDLLENLQAYQKRMGVQMQRFK
H1N1	NA1	ADC45738.1	MNPNQKIITIGSISIAIGIISLMLQIGNIISIWASHSIQTGSQNNTGICNQRIITYENSTWVNHTYVNINNTNVVAGEDKTSVTLAGNSSLCSISGWAIYTKDNSIRIGSKGDVFVIREPFISCSHLECRTFFLTQGALLNDKHSNGTVKDRSPYRALMSCPLGEAPSPYNSKFESVAWSASACHDGMGWLTIGISGPDNGAVAVLKYNGIITGTIKSWKKQILRTQESECVCMNGSCFTIMTDGPSNKAASYKIFKIEKGKVTKSIELNAPNFYYEECSCYPDTGIVMCVCRDNWHGSNRPWVSFNQNLDYQIGYICSGVFGDNPRPEDGEGSCNPVTVDGANGVKGFSYKYDNGVWIGRTKSNRLRKGFEMIWDPNGWTNTDSDFSVKQDVVAITDW…
H1N1	NP	ADC45737.1	MASQGTKRSYEQMETDGERQNATEIRASVGRMIGGIGRFYIQMCTELKLNDYEGRLIQNSLTMERMVLSAFDERRNKYLEEHPSAGKDPKKTGGPIYKRVDGKWVRELVLYDKEEIRRIWRQANNGDDATAGLTHIMIWHSNLNDTTYQRTRALVRTGMDPRMCSLMQGSTLPRRSGAAGAAVKGVGTMVLELIRMIKRGINDRNFWRGENGRKTRIAYERMCNILKGKFQTAAQKAMMDQVRESRNPGNAEIEDLTFLARSALILRGSVAHKSCLPACVYGPAVASGYDFEKEGYSLVGVDPFKLLQTSQVYSLIRPNENPAHKSQLVWMACNSAAFEDLRVSSFIRGTRVLPRGKLSTRGVQIASNENMDAIVSSTLELRSRYWAIRTRSGGNTNQQ…
H1N1	HA	ADC45736.1	MKVKLLVLLCTFTATYADTICIGYHANNSTDTVDTVLEKNVTVTHSVNLLENSHNGKLCLLKGIAPLQLGNCSVAGWILGNPECELLISKESWSYIVEKPNPENGTCYPGHFADYEELREQLSSVSSFERFEIFPKESSWPNHTVTGVSASCSHNGESSFYRNLLWLTGKNGLYPNLSKSYANNKEKEVLVLWGVHHPPNIGDQKALYHTENTYVSVVSSHYSRKFTPEIAKRPKVRDQEGRINYYWTLLEPGDTIIFEANGNLIAPRYAFALSRGFGSGIINSNAPMDKCDAKCQTPQGAINSSLPFQNVHPVTIGECPKYVRSAKLRMVTGLRNIPSIQSRGLFGAIAGFIEGGWTGMVDGWYGYHHQNEQGSGYAADQKSTQNAINGITNKVNSVI…
H1N1	PA	ADC45735.1	MEDFVRQCFNPMIVELAEKAMKEYGEDLKIETNKFAAICTHLEVCFMYSDFHFINEQGESIIVEPEDPNALLKHRFEIIEGRDRTMAWTVVNSICNTTGAEKPKFLPDLYDYKENRFIEIGVTRREVHIYYLEKANKIKSEKTHIHIFSFTGEEMATKADYTLDEESRARIKTRLFTIRQEMASRGLWDSFRQSERGEETIEERFEITGTMRRLADQSLPPNFSCIENFRAYVDGFEPNGYIEGKLSQMSKEVNARIEPFLKTTPRPIRLPNGPPCFQRSKFLLMDSLKLSIEDPNHEGEGIPLYDAIKCMRTFFGWKEPTVVKPHEKGINPNYLLSWKQVLEELQDIESEEKIPRTKNMKKTSQLKWALGENMAPEKVDFDDCKDISDLKQYDSDEPE…
H1N1	PB1	ADC45733.1	MDVNPTLLFLKVPAQNAISTTFPYTGDPPYSHGTGTGYTMDTVNRTHQYSERGRWTKNTETGAPQLNPIDGPLPEDNEPSGYAQTDCVLEAMAFLEESHPGIFENSCIETMEVVQQTRVDKLTQGRQTYDWTLNRNQPAATALANTIEVFRSNGLIANESGRLIDFLKDVMESMDRGEVEVTTHFQRKRRVRDNVTKKMVTQRTIGKKKHKLDKRSYLIRALTLNTMTKDAERGKLKRRAIATPGMQIRGFVYFVETLARSICEKLEQSGLPVGGNEKKAKLANVVRKMMTNSQDTEISFTITGDNTKWNENQNPRMFLAMITYITKNQPEWFRNILSIAPIMFSNKMARLGKGYMFESKSMKLRTQIPAEMLANIDLKYFNDSTKKKIEKIRPLLIDG…
H1N1	PB1-F2	ADC45734.1	MGQEQGTPWIQSTGHTSTQKEEDGQKIPKLEHRNLTQLMVHYRKTMNQVAMPKQIVY
Virus_name	Protein	NCBI_ID	Sequence
H3N2	HA	IAV|JN22022_HA	MKTIIALSYTLCLVFAQKIPGNDNSTATLCLGHHAVPNGTIVKTITNDRIEVTNATELVQNSSTGEICDSPHQILDGGNCTLIDALLGDPQCDGFQNKEWDLFVERSRANSNCYPYDVPDYASLRSLVASSGTLEFKNESFNWTGVKQNGTSSACIRGSSSSFFSRLNWLTHLNYTYPALNVTMPNNEQFDKLYIWGVHHPSTDKDQISLFAQPSGRITVSTKRSQQAVIPNIGSRPRIRDIPSRISIYWTIVKPGDILLINSTGNLIAPRGYFKIRSGKSSIMRSDAPIGKCKSECITPNGSIPNDKPFQNVNRITYGACPRYVKQSTLKLATGMRNVPEKQTRGIFGAIAGFIENGWEGMVDGWYGFRHQNSEGRGQAADLKSTQAAIDQINGKLNR…
H3N2	M1	IAV|JN22022_M1	MSLLTEVETYVLSIVPSGPLKAEIAQRLEDVFAGKNTDLEALMEWLKTRPILSPLTKGILGFVFTLTVPSERGLQRRRFVQNALNGNGDPNNMDKAVKLYRKLKREITFHGAKEIALSYSAGALASCMGLIYNRMGAVTTEVAFGLVCATCEQIADSQHRSHRQMVATTNPLIKHENRMVLASTTAKAMEQMAGSSEQAAEAMEIASQARQMVQAMRAIGTHPSSSTGLRDDLLENLQTYQKRMGVQMQRFK
H3N2	M2	IAV|JN22022_M2	MSLLTEVETPIRNEWGCRCNDSSDPLVVAANIIGILHLILWILDRLFFKCVYRLFKHGLKRGHSTEGVPESMREEYRKEQQNAVDADDSHFVSIELE
H3N2	NA1	IAV|JN22022_NA	MNPNQKIITIGSVSLTISTICFFMQIAILITTVTLHFKQYEFNSPPNNQVMLCEPTIIERNMTEIVYLTNTTVEKEICPKPAEYRNWSKPQCGITGFAPFSKDNSIRLSAGGDIWVTREPYVSCDLDKCYQFALGQGTTLNNVHSNNTVRDRTPYRTLLMNELGVPFHLGTKQVCIAWSSSSCHDGKAWLHVCITGDDKNATASLIYNGRLVDSVVSWSNNILRTQESECVCINGTCTVVMTDGHATGKADTKILFIEEGKIVHTSKLSGSAQHVEECSCYPRYPGVRCVCRDNWKGSNRPIIDINIKDHSIVSRYVCSGLVGDTPRKSDSSSSSHCLNPNNEKGDHGVKGWAFDDGNDVWMGRTINETSRLGYETFKVIEGWSNPKSKLQINRQVIVD…
H3N2	NEP	IAV|JN22022_NEP	MDSNTVSSFQDILLRMSKMQLGSSSEDLNGMITRFESLKIYRDSLGEAVMRMGDLHLLQNRNGKWREQLGQKFEEIRWLIEEVRHRLRTTENSFEQITFMQALQLLFEVEQEIRTFSFQLI
H3N2	NP	IAV|JN22022_NP	LSDIKIMASQGTKRSYEQMETDGDRQNATEIRASVGKMIDGIGRFYIQMCTELKLSDHEGRLIQNSLTIEKMVLSAFDERRNKYLEEHPSAGKDPKKTGGPIYRRVDGKWMRELVLYDKEEIRRIWRQANNGEDATSGLTHIMIWHSNLNDATYQRTRALVRTGMDPRMCSLMQGSTLPRRSGAAGAAVKGVGTMVMELIRMIKRGINDRNFWRGENGRKTRSAYERMCNILKGKFQTAAQRAMVDQVRESRNPGNAEIEDLIFLARSALILRGSVAHKSCLPACAYGPAVSSGYDFEKEGYSLVGIDPFKLLQNSQIYSLIRPNENPAHKSQLVWMACHSAAFEDLRLLSFIRGTKVSPRGKLSTRGVQIASNENMDNMGSSTLELRSGYWAIRTRSG…
H3N2	NS1	IAV|JN22022_NS1	MDSNTVSSFQVDCFLWHIRKQVVDQKLSDAPFLDRLRRDQRSLRGRGNTLGLDIKSATHVGKQIVEKILKGESDEALKMTMVSTPASRYITDMTIEELSRNWFMLMPKQKVEGPLCIRMDQAIMEKNIMLKANFNVIFGRLETIVLLRAFTEEGAIVGEISPLPSFPGHTIEDVKNAIGVLIGGLEWNDNTVRVSKNLQRFAWRSSHENGGPPLTPKQKREMARTARSEV
H3N2	PA	IAV|JN22022_PA	MEDFVRQCFNPMIVELAEKAMKEYGEDLKIETNKFAAICTHLEVCFMYSDFHFINEQGESIVVELDDPNALLKHRFEIIEGRDRTMAWTVVNSICNTTGAGKPKFLPDLYDYKENRFIEIGVTRREVHIYYLEKANKIKSENTHIHIFSFTGEEMATRADYTLDEESRARIKTRLFTIRQEMANRGLWDSFRQSERGEETIEEKFEITGTMRRLADQSLPPNFSCLENFRAYVDGFEPNGCIEGKLSQMSKKVNAQIEPFLKTTPRPIKLPSGPPCYQRSKFLLMDALKLSIEDPSHEGEGIPLYDAIKCIKTFFGWKEPYIVKPHEKGINSNYLLSWKQVLSELQDIENEEKIPRTKNMKKTSQLKWALGENMAPEKVDFENCRDISDLKQYDSEEPE…
H3N2	PA-X	IAV|JN22022_PA-X	MEDFVRQCFNPMIVELAEKAMKEYGEDLKIETNKFAAICTHLEVCFMYSDFHFINEQGESIVVELDDPNALLKHRFEIIEGRDRTMAWTVVNSICNTTGAGKPKFLPDLYDYKENRFIEIGVTRREVHIYYLEKANKIKSENTHIHIFSFTGEEMATRADYTLDEESRARIKTRLFTIRQEMANRGLWDSFVSPKEAKKQLKKNLKSQELCAGLPTKVSHRTSPALRILEPMWMDSNRTAALRASFLKCPKK
H3N2	PB1	IAV|JN22022_PB1	MDVNPTLLFLKVPAQNAISTTFPYTGDPPYSHGTGTGYTMDTVNRTHQYSERGKWTTNTETGAPQLNPIDGPLPEDNEPSGYAQTDCVLEAMAFLEESHPGIFENSCLETMEAVQQTRVDKLTQGRQTYDWTLNRNQPAATALANTIEVFRSNGLTANESGRLIDFLKDVMESMDKDEMEITTHFQRKRRVRDNMTKKMVTQRTIGKKKQRVNKRGYLIRALTLNTMTKDAERGKLKRRAIATPGMQIRGFVYFVETLARSICEKLEQSGLPVGGNEKKAKLANVVRKMMTNSQDTELSFTITGDNTKWNENQNPRMFLAMITYITKNQPEWFRNILSIAPIMFSNKMARLGKGYMFESKRMKLRTQIPAEMLASIDLKYFNESTRKKIEKIRPLLIDG…
H3N2	PB1-F2	IAV|JN22022_PB1-F2	MEQGQGTLWTQSTEHTNTQRGGSGRQIQKLGLPNSTQLMDHYLRIMNQVDMHKQTVSWRLWPSLKNPTQVSLKTPALKQWKPFNRQG
H3N2	PB2	IAV|JN22022_PB2	MERIKELRNLMSQSRTREILTKTTVDHMAIIKKYTSGRQEKNPSLRMKWMMAMKYPITAEKRITEMVPERNEQGQTLWSKMSDAGSDRVMVSPLAVTWWNRNGPVTDTVHYPKVYKTYFDKVERLKHGTFGPVHFRNQVKIRRRVDINPGHADLSAKEAQDVIMEVVFPNEVGARILTSESQLTITKEKKEELRDCKISPLMVAYMLERELVRKTRFLPVAGGTSSIYIEVLHLTQGTCWEQMYTPGGGVRNDDVDQSLIIAARNIVRRAAVSADPLASLLEMCHSTQIGGTRMVDILRQNPTEEQAVDICKAAMGLRISSSFSFGGFTFKRTSGSSVKREEEVLTGNLQTLRIRVHEGYEEFTMVGKRATAILRKATRRLVQLIVSGRDEQSIAEAII…
Virus_name	Protein	NCBI_ID	Sequence
H9N2	NS1	AER39804.1	MDSNTVSSFQVDCFLWHVRKRFADQELGDAPFLDRLRRDQKSLRGRGSTLGLDIETATRAGKQIVKRILEEESDEALKMTIASVPASRYLTDMTLEEMSRDWFMLMPKQKVAGSLCIRMDQAITDKNIILKANFSVIFDRLETLILLRAFTEEGAIVGEISPLPSLPGHTDEDVKNAIGVLIGGLEWNDNTVRVSETLQRFAWRSSNEDGRPPLPPKQKRKMARTIESEV
H9N2	M1	AER39800.1	MSLLTEVETYVLSIVPSGPLKAEIAQRLEDVFAGKNTDLEALMEWLKTRPILSPLTKGILGFVFTLTVPSERGLQRRRFVQNALNGNGDPNNMDRAVKLYRKLKREITFHGAKEVALSYSTGALASCMGLIYNRMGTVTTEVAFGLVCATCEQIADSQHRSHRQMVTTTNPLIRHENRMVLASTTAKAMEQMAGSSEQAAEAMEVASQARQMVQAMRTIGTHPSSSAGLKDDLLENLQAYQKRMGVQMQRFK
H9N2	NA1	AER39802.1	MNPNQKIITIGSVSLTIATVCFLMQIAILATTITLHFKQNECSIPSNNQVVPCEPIIVERNITEIVYLNNTTIEKELCPKLTEYRDWSKPQCQITGFAPFSKDNSIRLSAGGDIWVTREPYVSCSPNKCYQFALGQGTTLDNKHSNGTIHDRIPHRTLLMNELGVPFHLGTKQVCIAWSSSSCHDGRAWLHVCITGDDRNATASFIYNGVLVDSIGSWSQNILRTQESECVCINGTCTVVMTDGSASGRADTRILFIKEGKIVHISPLSGSAQHIEECSCYPRYPDVRCVCRDNWKGSNRPVIDINMADYSIDSSYVCSGLVGDTPRNDDSSSNSNCKDPNNERGNPGVKGWAFDYGSDVWMGRTISKDSRSGYETFRVIGGWTTANSKSQVNRQVIVD…
H9N2	NP	AER39803.1	MASQGTKRSYEQMETGGERQNATEIRASVGRMVGGIGRFYIQMCTELKLSDHEGRLIQNSITIERMVLSAFDERRNRYLEEHPSAGKDPKKTGGPIYRRRDGKWVRELILYDKEEIRRIWRQANNGEDATAGLTHMMIWHSNLNDATYQRTRALVRTGMDPRMCSLMQGSTLPRRSGAAGAAVKGVGTMVMELIRMIKRGVNDRNFWRGENGRRTRIAYERMCNILKGKFQTAAQRAMVDQVRESRNPGNAEIEDLIFLARSALILRGSVAHKSCLPACVYGLAVASGYDFEREGYSLVGIDPFRLLQNSQVFSLIRPNENPAHKSQLVWMACHSAAFEDLRVLSFIRGARVVPRGQLSTRGVQIASNENTEAMDSSTLELRSRYWAIRTRSGGNTNQQ…
H9N2	HA	AER39799.1	MEVIALIAILVVTGTSNADKICIGYQSTNSTETVDTLVETNVPVTHAKELLHTEHNGMLCATNQGHPLILDTCTVEGLVYGNPACDSLLGGKEWSYIVERSSAVHGMCYPGRVENLEELRSFFSSARSYKRLLLFPDRTWNVTFTGTSKACSGSFYRSMRWLTHKSNSYPIQDAQYTNDWGKNILFVWGIHHPPTDTEQMNLYKKADTTTSITTEDINRTFKPVIGPRPIVNGQQGRIDYYWSVLKPGQTLRIRSNGNLIAPWYGHILSGESHGRILKTDLNSGNCVVQCQTEKGGLNTTLPFHNVSKYAFGNCPKYVGVKSLKLAVGLRNVPATSGRGLFGAIAGFIEGGWPGLVAGWYGFQHSNDQGVGMAADRESTQTAVNKITSKVNNIIDKMNK…
H9N2	PB1	AER39807.1	MDVNPTLLFLKVPAQNAISTTFPYTGDPPYSHGTGTGYTMDTVNRTHQYSEKGKWTTNTETGAPQLNPIDGPLPEDNEPSGYAQTDCVLEAMAYLEESHPGIFENSCLETMEIVQQTRVDKLTQGRQTYDWTLNRNQPAATALANTIEVFRSNGLTNNESGRLIDFLKDVIESMDKEEMEITTHFQRKRRVRDNMTKKMVTQRTIGKKKQKLNKKSYLIRALTLNTMTKDAERGKLKRRAIATPGMQIRGFVYFVETLARSICEKLEQSGLPVGGNEKKAKLANVVRKMMTNSHDTELSFTITGDNTKWNENQNPRVFLAMITYITRNQPEWFRNVLSIAPIMFSNKMARLGKGYMFESKSMKLRTQIPAEMLADIDLKYFNESTKKKIEKIRPLLIDG…
H9N2	PA	AER39806.1	MEDFVRQCFNPMIVELAEKAMKEYGEDPKIETNKFAAICTHLEVCFMYSDFHFIDERGESIIVESGDPNALLKHRFEIIEGRDRTMAWTVVNSICNTTGVDKPKFLPDLYDYKENRFIEIGVTRREVHIYYLEKANKIKSEKTHIHIFSFTGEEMATKADYTLDEESRARIKTRLFTIRQEMASRGLWDSFRQSERGEETIEERFEITGTMRRLADQSLPPNFSSLENFRAYVDGFEPNGCIEGKLSQMSKEVNARIEPFLKTTPRPLRLPDGPPCSQRSKFLLMDALKLSIEDPSHEGEGIPLYDAIKCMKTFFGWKEPNIVKPHEKGINPNYLLAWKQVLAELQDIENGEEIPKTKNMKKTSQLKWALGENMAPEKVDFEDCKDVSDLRQYDSDEPE…
H9N2	PB2	AER39808.1	MERIKELRDLMSQSRTREILTKTTVDHMAIIKKYTSGRQEKNPALRIKWMMAMKYPITADKRIMEMIPERNEQGQTLWSKTNDAGSDRVMVSPLAVTWWNRNGPTTSTVHYPKVYKTYFEKVERLKHGTFGPVHFRNQVKIRRRVDINPGHADLSAKEAQDVIMEVVFPNEVGARILTSESQLTITKEKKEELQDCKIAPLMVAYMLERELVRKTRFLPVAGGTSSVYIEVLHLTQGTCWEQMYTPGGEVRNDDVDQSLIIAARNIVRRATVSADPLASLLEMCHSTKIGGIRMVDILRQNPTEEQAVDICKAAMGLRISSSFSFGGFTFKRTSGSSVKKEEEVLTGNLQTLKIRVHEGYEEFTMVGRRATAILRKATKRLIQLIVSGRDEQSIAEAII…
H9N2	NEP	AER39805.1	MDSNTVSSFQDILMRMSKMQLGSSSEDLNGMITQFESLKLYRDS LGEAVMRMGDLHSLQNRNGKWREQLSQKFEEIRWLIEEVRHRLKITENSFEQITFMQALQLLLEVEQEIRTFSFQLI
H9N2	M2	AER39801.1	MSLLTEVETPTRNGWECKCSDSSDPLVIAASIIGILHLILWILD RLFFKCIYRRLKYGLKRGPSTEGVPESMREEYRQEQQSAVDVDDDHFVNIELE
